# Supplementary material for: One-pot synthesis of carbazoles via tandem C–C cross-coupling and reductive amination
Source: Royal Society of Chemistry journal article supplement (doi:10.1039/c5ob01952d), 2015-10-28

## **Supplementary Information**

### **One-Pot Synthesis of Carbazoles via Tandem C-C Cross-Coupling and Reductive Amination**

Deuk-young Goo and Sang Kook Woo\*

Department of Chemistry, University of Ulsan, 93 Daehak-Ro, Nam-Gu, Ulsan 44610, Korea

#### **Table of Contents**

|                                                                       |          |
|-----------------------------------------------------------------------|----------|
| General Information .....                                             | S2       |
| General Procedure for Carbazole Synthesis .....                       | S3       |
| Detailed Procedure and Spectral Data for Compounds .....              | S4–S97   |
| General Procedure for Suzuki coupling of 3-chlorocarbazole (3i) ..... | S98      |
| Detailed Procedure and Spectral Data for Compounds .....              | S99–S111 |

## **General Information**

All reactions were run under an atmosphere of air under anhydrous conditions unless otherwise indicated. Dichloromethane ( $\text{CH}_2\text{Cl}_2$ ), tetrahydrofuran (THF), dimethylformamide (DMF) and toluene (PhMe) were obtained from Pure-Solv MD-5 Solvent Purification System (Innovative Technology). Pressure tubes (13 x 100 mm, PYREXPLUS, and 350 mL flask, purchased from Chem Glass) were dried in oven for overnight and cooled under a stream of nitrogen prior to use. All commercial reagents were used directly without further purification.

The progress of reaction was checked on TLC plates (Merck 5554 Kiesel gel 60  $\text{F}_{254}$ ), and the spots were visualized under 254 nm UV light and/or charring after dipping the TLC plate into a *p*-anisaldehyde solution (5.6 mL of *p*-anisaldehyde, 2.3 mL acetic acid and 3.0 mL of concentrated sulfuric acid in 200 mL of ethanol) or a  $\text{KMnO}_4$  solution (3 g of  $\text{KMnO}_4$ , 20 g of  $\text{K}_2\text{CO}_3$ , and 5 mL of 5% NaOH solution in 300 mL of water). Column chromatography was performed on silica gel (Merck 9385 Kiesel gel 60) using hexanes-EtOAc (v/v) or hexanes-acetone (v/v). The solvents were simple distilled unless otherwise noted.

Infrared spectra were recorded on a Varian 2000 FT-IR. High-resolution mass spectra (EI) were obtained on a Jeol JMS 700 HRMS at the Korea Basic Science Center (KBSI), Daegu, Korea. Low-resolution mass spectra (EI) were obtained on a Varian 450-GC/Varian 220-MS and are reported as  $m/z$  (relative intensity). Accurate masses are reported for the molecular ion ( $[\text{M}+\text{H}]^+$  or  $[\text{M}+\text{Na}]^+$ ). Nuclear magnetic resonance spectra ( $^1\text{H}$  NMR and  $^{13}\text{C}$  NMR) were recorded with a Bruker (300 MHz) spectrometer. Chemical shift values were recorded as parts per million relative to tetramethylsilane as an internal standard unless otherwise indicated, and coupling constants in Hertz. The following abbreviations are used: m (multiplet), s (singlet), d (doublet), t (triplet), q (quartet), dd (doublet of doublets), etc.

## General Procedure for Carbazole Synthesis

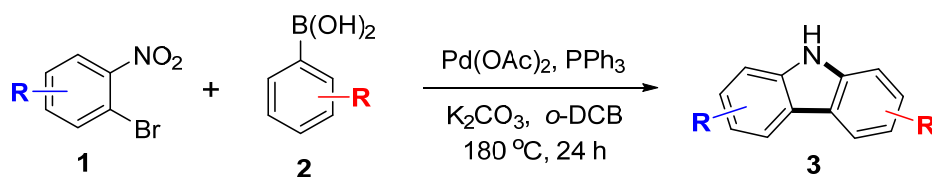

To a re-sealable pressure tube (13 x 100 mm) equipped with magnetic stir bar were added *o*-bromonitrobenzene **1** (0.5 mmol, 100 mol%), aryl boronic acid **2** (0.65 mmol, 130 mol%), Pd(OAc) (0.01 mmol, 2 mol%), PPh<sub>3</sub> (1.25 mmol, 250 mol %), K<sub>2</sub>CO<sub>3</sub> (1 mmol, 200 mol%) and *o*-DCB (1 mL, 0.5 M concentration with respect to *o*-bromonitrobenzene **1**). The mixture was heated at 180 °C (oil bath temperature) for 24-48 hr, at which point the reaction mixture was allowed to cool to ambient temperature. The reaction mixture was filtered through a pad of celite and the resulting liquor was concentrated *in vacuo* and purified by flash column chromatography (SiO<sub>2</sub>) under the conditions noted to furnish the corresponding product.

## Detailed Procedure and Spectral Data for Compounds

### 9H-carbazole (3a)

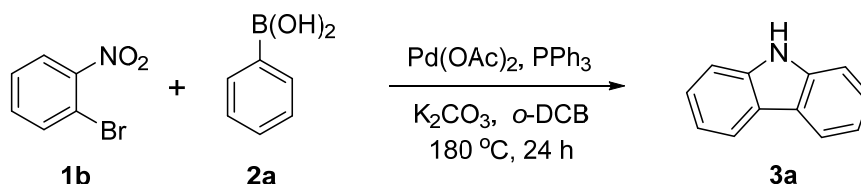

To a re-sealable pressure tube (13 x 100 mm) equipped with magnetic stir bar were added 1-bromo-2-nitrobenzene **1b** (100 mg, 0.5 mmol, 100 mol%), phenylboronic acid **2a** (82 mg, 0.65 mmol, 130 mol%), Pd(OAc)<sub>2</sub> (2.2 mg, 0.01 mmol, 2 mol%), PPh<sub>3</sub> (328 mg, 1.25 mmol, 250 mol %), K<sub>2</sub>CO<sub>3</sub> (138 mg, 1 mmol, 200 mol%) and *o*-DCB (1 mL, 0.5 M concentration with respect to 1-bromo-2-nitrobenzene **1b**). The mixture was heated at 180 °C (oil bath temperature) for 24 hr, at which point the reaction mixture was allowed to cool to ambient temperature. The reaction mixture was filtered through a pad of celite and the resulting liquor was concentrated *in vacuo* and purified by flash column chromatography (SiO<sub>2</sub>) using 5% acetone in hexanes as eluant to give **3a** as a white solid (72 mg, 86% yield). <sup>1</sup>H and <sup>13</sup>C NMR data were consistent with literature values.<sup>1</sup>

**TLC (SiO<sub>2</sub>):** R<sub>f</sub> = 0.34 (acetone:hexanes, 1:5).

**<sup>1</sup>H NMR** (300 MHz, DMSO): δ 11.33 (s, 1H), 8.12 (d, *J* = 7.8 Hz, 3H), 7.56 (d, *J* = 8.1 Hz, 2H), 7.45 – 7.39 (m, 3H), 7.21 – 7.16 (m, 3H).

**<sup>13</sup>C NMR** (75 MHz, DMSO): δ 139.79, 125.54, 122.48, 120.18, 118.53, 110.98.

**FTIR** (neat): ν 3379, 2946, 1450, 1033 cm<sup>-1</sup>.

**LRMS** *m/z* (EI): 166.8 (M<sup>+</sup>-1), 139.0, 83.4, 62.8.

---

(1) C. Suzuki, K. Hirano, T. Satoh and M. Miura, *Org. Lett.*, 2015, **17**, 1597-1600.

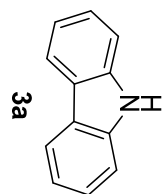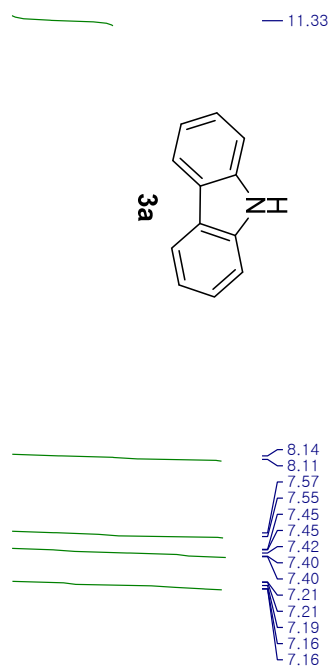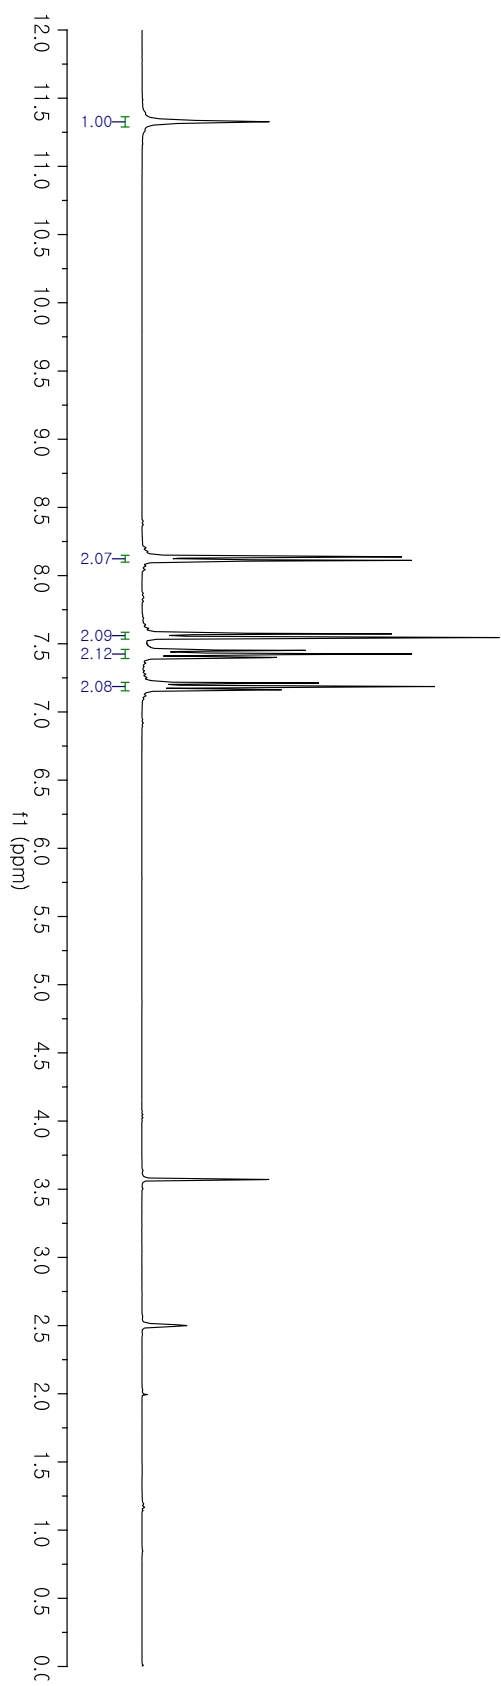

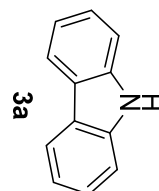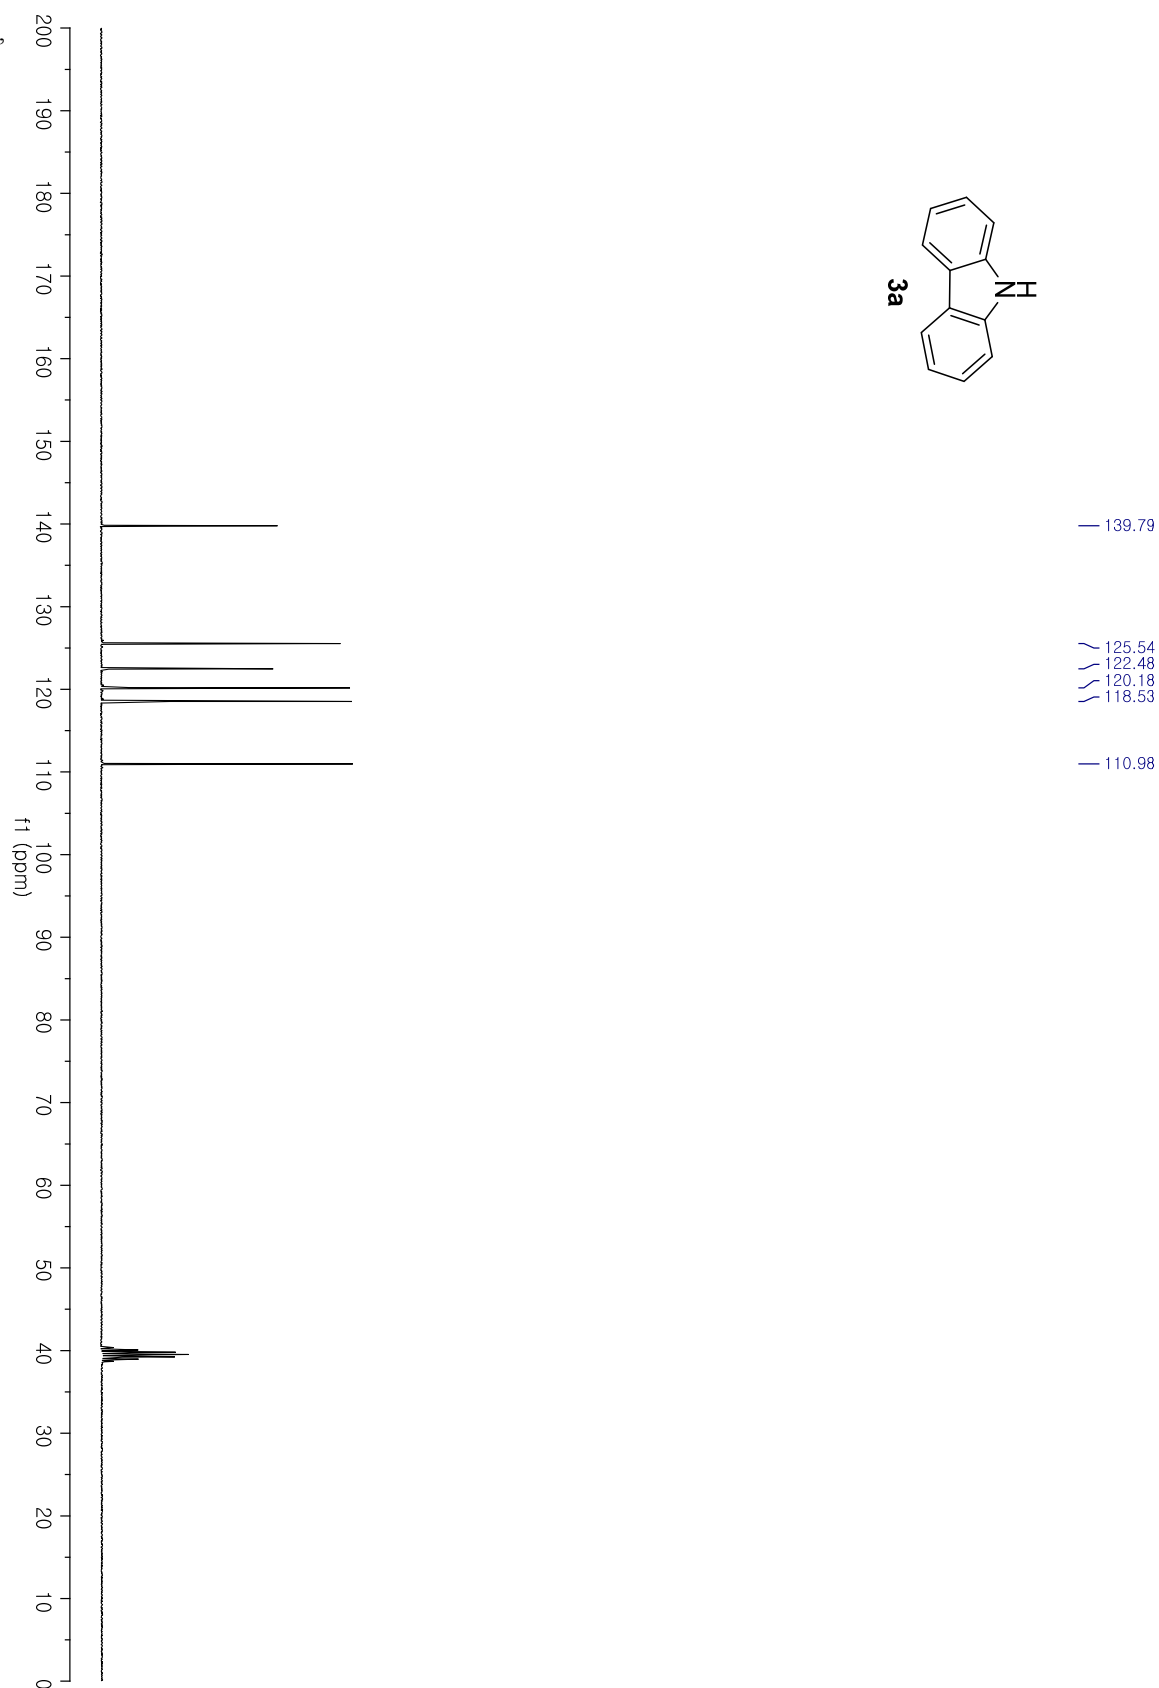

### 2-Methyl-9H-carbazole (3b)

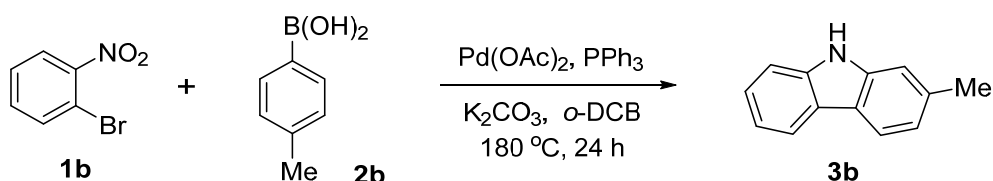

To a re-sealable pressure tube (13 x 100 mm) equipped with magnetic stir bar were added 1-bromo-2-nitrobenzene **1b** (100 mg, 0.5 mmol, 100 mol%), *p*-Tolylboronic acid **2b** (88 mg, 0.65 mmol, 130 mol%), Pd(OAc)<sub>2</sub> (2.2 mg, 0.01 mmol, 2 mol%), PPh<sub>3</sub> (328 mg, 1.25 mmol, 250 mol %), K<sub>2</sub>CO<sub>3</sub> (138 mg, 1 mmol, 200 mol%) and *o*-DCB (1 mL, 0.5 M concentration with respect to 1-bromo-2-nitrobenzene **1b**). The mixture was heated at 180 °C (oil bath temperature) for 24 hr, at which point the reaction mixture was allowed to cool to ambient temperature. The reaction mixture was filtered through a pad of celite and the resulting liquor was concentrated *in vacuo* and purified by flash column chromatography (SiO<sub>2</sub>) using 5% acetone in hexanes as eluant to give **3b** as a white solid (76 mg, 84% yield). <sup>1</sup>H and <sup>13</sup>C NMR data were consistent with literature values.<sup>2</sup>

**TLC (SiO<sub>2</sub>):** R<sub>f</sub> = 0.32 (acetone:hexanes, 1:5).

**<sup>1</sup>H NMR** (300 MHz, CDCl<sub>3</sub>) δ 8.03 (d, *J* = 7.8 Hz, 1H), 7.95 (d, *J* = 7.9 Hz, 2H), 7.42 – 7.35 (m, 2H), 7.24 – 7.18 (m, 2H), 7.07 (d, *J* = 8.0 Hz, 1H), 2.53 (s, 3H).

**<sup>13</sup>C NMR** (75 MHz, CDCl<sub>3</sub>) δ 140.09, 139.59, 136.15, 125.41, 123.58, 121.19, 121.12, 120.14, 120.13, 119.46, 110.86, 110.60, 22.21.

**FTIR** (neat) ν 3394, 2920, 1652, 1530, 1365 cm<sup>-1</sup>.

**LRMS** *m/z* (EI): 179.8 (M<sup>+</sup>-1), 151.8, 76.8, 62.8.

(2) B. Alcaide, P. Almendros, J. M. Alonso, M. T. Quirós and P. Gadziński, *Adv. Synth. Catal.*, 2011, **353**, 1871-1876.

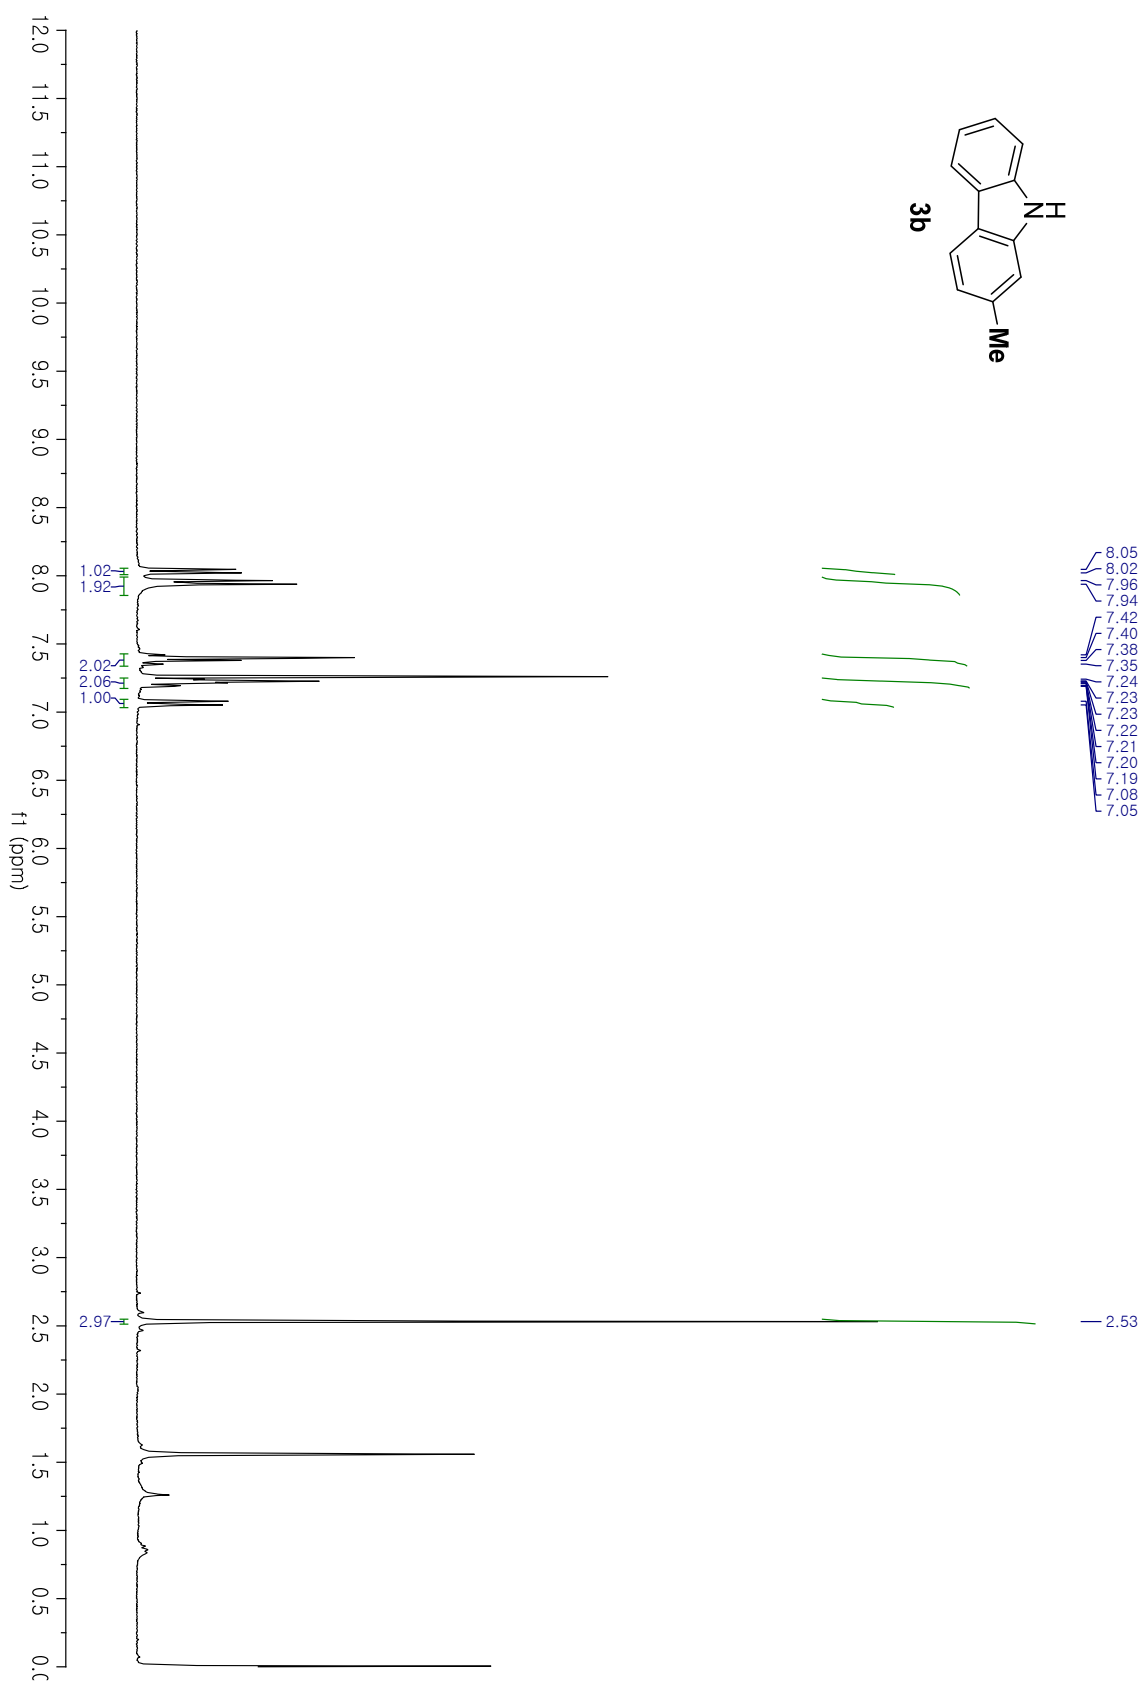



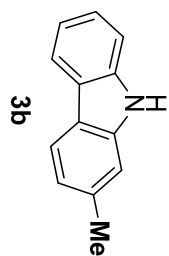

140.09  
139.59  
136.15

125.41  
123.58  
121.19  
121.12  
120.14  
120.13  
119.46

110.86  
110.60

22.21

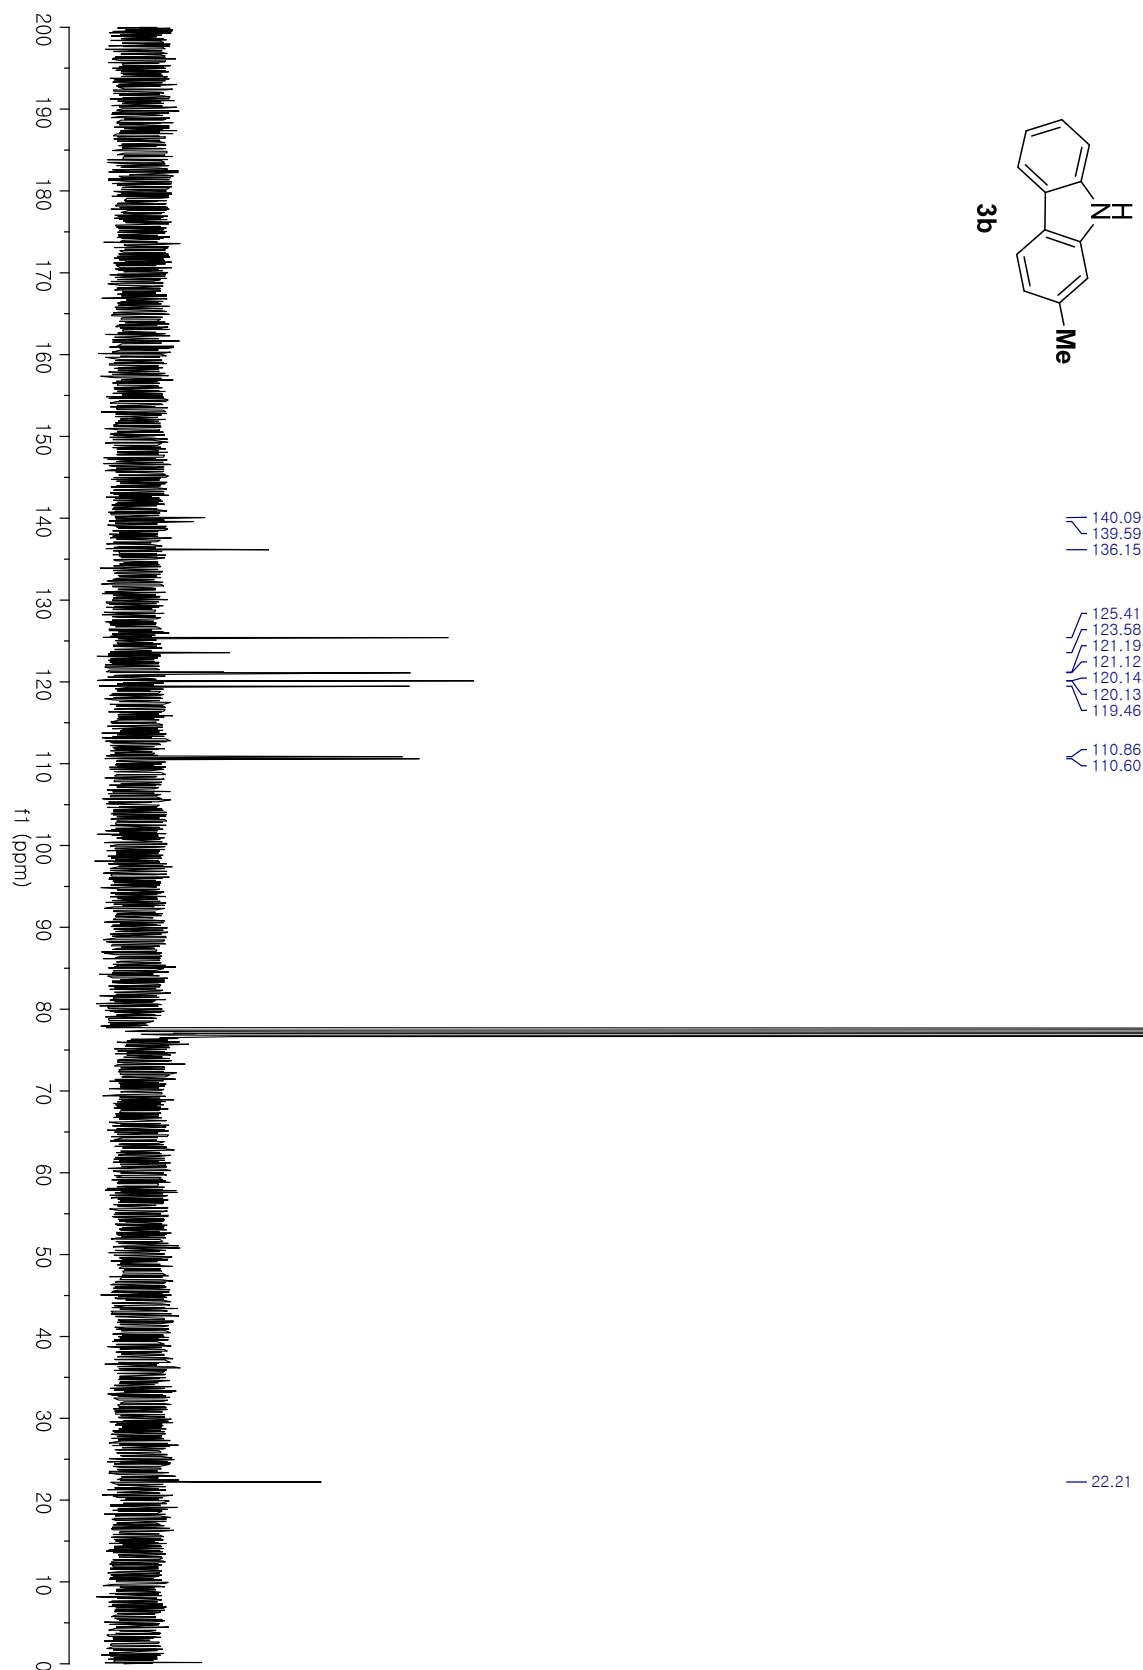

#### 4-Methyl-9H-carbazole (3c)

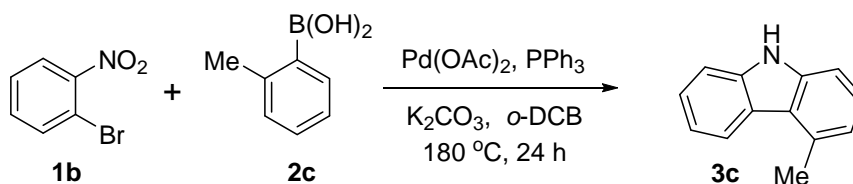

To a re-sealable pressure tube (13 x 100 mm) equipped with magnetic stir bar were added 1-bromo-2-nitrobenzene **1b** (100 mg, 0.5 mmol, 100 mol%), *o*-Tolylboronic acid **2c** (88 mg, 0.65 mmol, 130 mol%), Pd(OAc)<sub>2</sub> (2.2 mg, 0.01 mmol, 2 mol%), PPh<sub>3</sub> (328 mg, 1.25 mmol, 250 mol %), K<sub>2</sub>CO<sub>3</sub> (138 mg, 1 mmol, 200 mol%) and *o*-DCB (1 mL, 0.5 M concentration with respect to 1-bromo-2-nitrobenzene **1b**). The mixture was heated at 180 °C (oil bath temperature) for 24 hr, at which point the reaction mixture was allowed to cool to ambient temperature. The reaction mixture was filtered through a pad of celite and the resulting liquor was concentrated *in vacuo* and purified by flash column chromatography (SiO<sub>2</sub>) using 5% acetone in hexanes as eluant to give **3c** as a white solid (79 mg, 87% yield). <sup>1</sup>H and <sup>13</sup>C NMR data were consistent with literature values.<sup>3</sup>

**TLC (SiO<sub>2</sub>):** R<sub>F</sub> = 0.33 (acetone:hexanes, 1:5).

**<sup>1</sup>H NMR** (300 MHz, CDCl<sub>3</sub>): δ 8.19 (d, J = 7.9 Hz, 1H), 8.09 (br s, 1H), 7.50 – 7.39 (m, 2H), 7.37 – 7.31 (m, 1H), 7.32 – 7.26 (m, 2H), 7.02 (dd, J = 7.3, 0.8 Hz, 1H), 2.89 (s, 3H).

**<sup>13</sup>C NMR** (75 MHz, CDCl<sub>3</sub>): δ 139.54, 139.51, 133.49, 125.77, 125.29, 123.93, 122.68, 121.90, 120.99, 119.44, 110.49, 108.26, 20.92.

**FTIR** (neat) ν 3396, 3200, 2924, 1653, 1521, 1267, 1048 cm<sup>-1</sup>.

**LRMS** *m/z* (EI): 181.3 (M<sup>+</sup>), 182.3, 180.4, 177.5, 155.3, 125.8, 93.7.

(3) B. J. Stokes, B. Jovanović, H. Dong, K. J. Richert, R. D. Riell and T. G. Driver, *J. Org. Chem.*, 2009, **74**, 3225-3228.

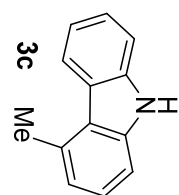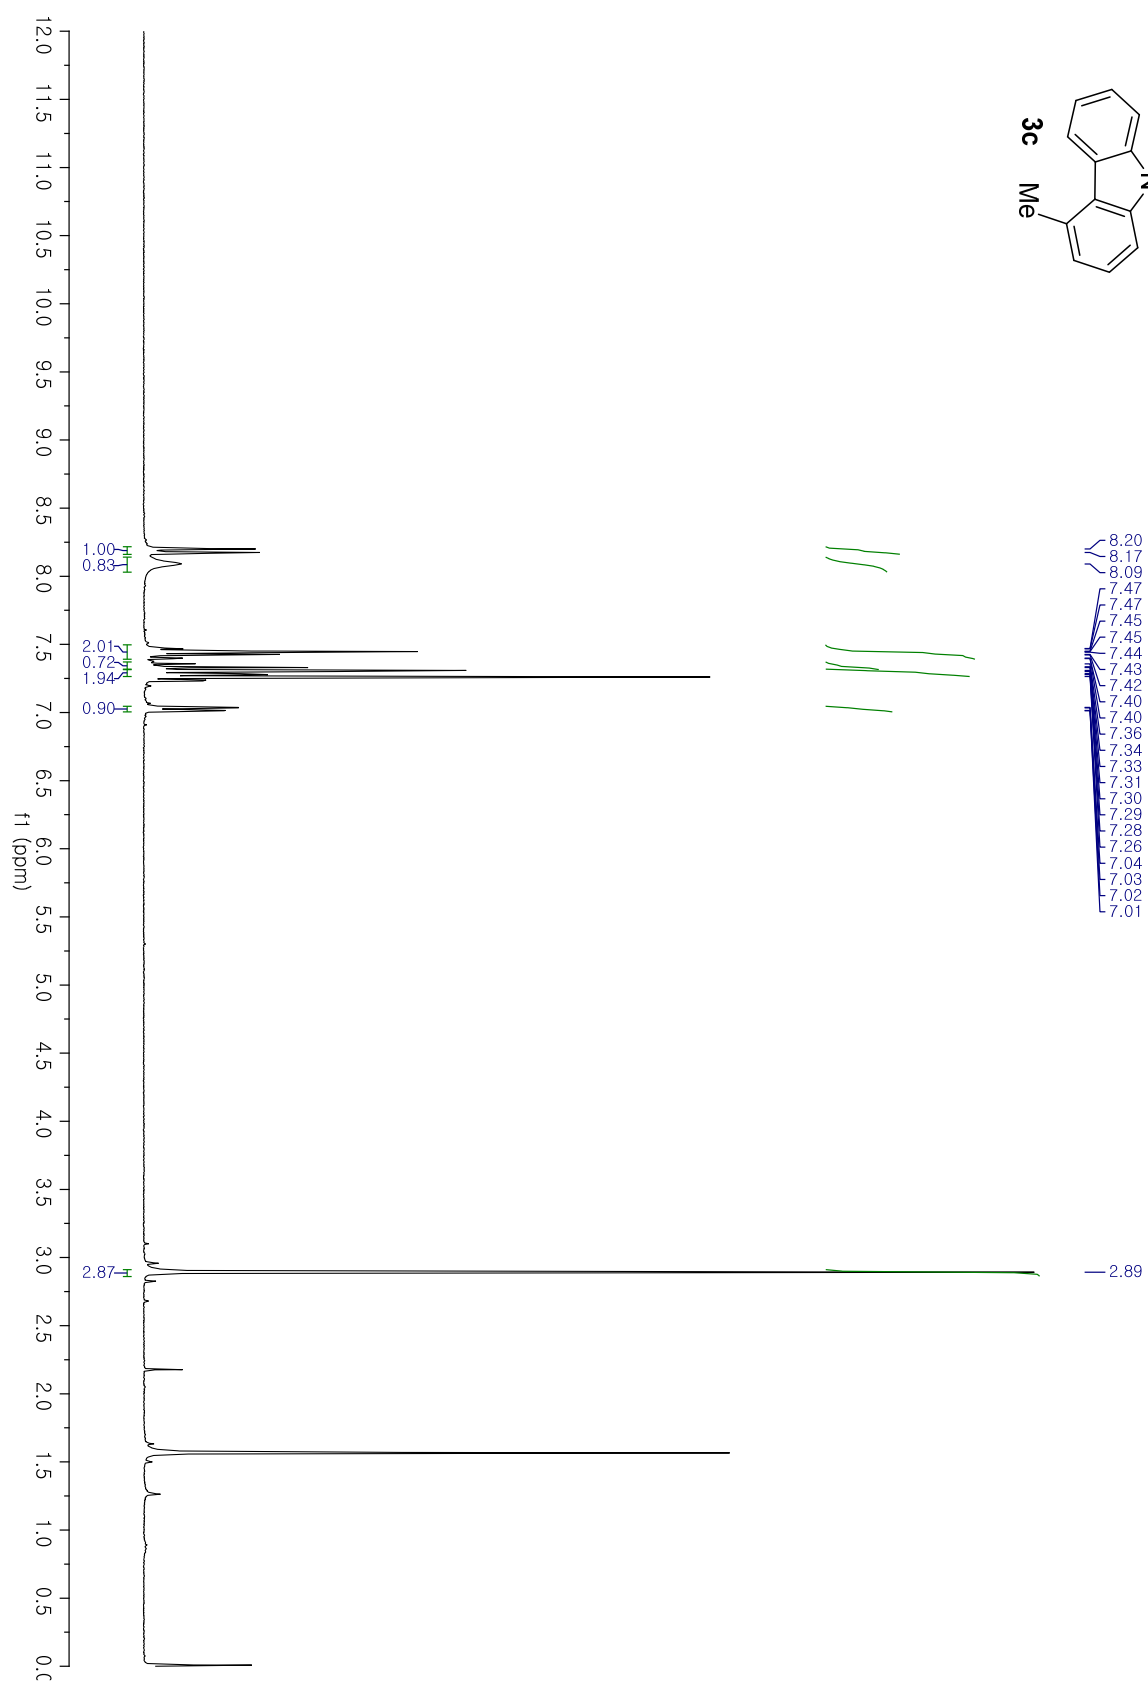

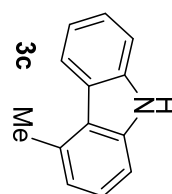

$\gamma$  139.54  
 139.51  
 — 133.49  
 $\gamma$  125.77  
 125.29  
 123.93  
 122.68  
 121.90  
 120.99  
 119.44

— 110.49  
 — 108.26

— 20.92

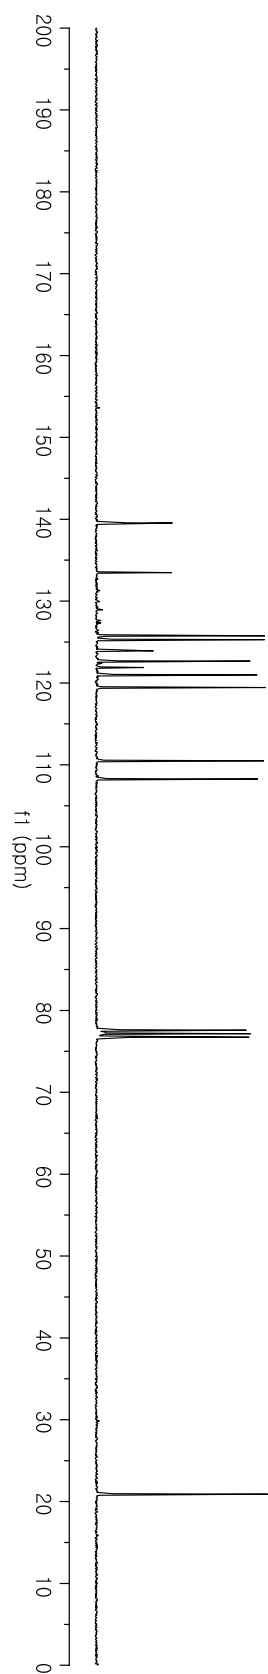

### 2-(Tert-butyl)-9H-carbazole (3d)

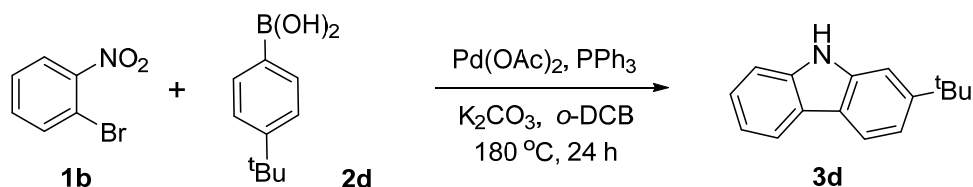

To a re-sealable pressure tube (13 x 100 mm) equipped with magnetic stir bar were added 1-bromo-2-nitrobenzene **1b** (100 mg, 0.5 mmol, 100 mol%), (4-(tert-butyl)phenyl)boronic acid **2d** (116 mg, 0.65 mmol, 130 mol%), Pd(OAc)<sub>2</sub> (2.2 mg, 0.01 mmol, 2 mol%), PPh<sub>3</sub> (328 mg, 1.25 mmol, 250 mol %), K<sub>2</sub>CO<sub>3</sub> (138 mg, 1 mmol, 200 mol%) and *o*-DCB (1 mL, 0.5 M concentration with respect to 1-bromo-2-nitrobenzene **1b**). The mixture was heated at 180 °C (oil bath temperature) for 24 hr, at which point the reaction mixture was allowed to cool to ambient temperature. The reaction mixture was filtered through a pad of celite and the resulting liquor was concentrated *in vacuo* and purified by flash column chromatography (SiO<sub>2</sub>) using 5% acetone in hexanes as eluant to give **3d** as a white solid (94 mg, 84% yield). <sup>1</sup>H and <sup>13</sup>C NMR data were consistent with literature values.<sup>4</sup>

**TLC (SiO<sub>2</sub>):** R<sub>f</sub> = 0.35 (acetone:hexanes, 1:5).

**<sup>1</sup>H NMR** (300 MHz, CDCl<sub>3</sub>) δ 8.05 (d, *J* = 7.0 Hz, 1H), 8.00 (d, *J* = 7.5 Hz, 1H), 7.94 (s, 1H), 7.44 (d, *J* = 1.6 Hz, 1H), 7.41 – 7.35 (m, 2H), 7.32 (dd, *J* = 8.3, 1.4 Hz, 1H), 7.25 – 7.20 (m, 1H), 1.44 (s, 9H).

**<sup>13</sup>C NMR** (75 MHz, CDCl<sub>3</sub>) δ 149.72, 139.89, 139.82, 125.40, 123.49, 121.03, 120.21, 119.90, 119.41, 117.65, 110.57, 107.25, 35.25, 31.90.

**FTIR** (neat) ν 3194, 2916, 1650, 1525, 1267 cm<sup>-1</sup>.

**LRMS** *m/z* (EI): 222.7 (M<sup>+</sup>-1), 207.8, 180.0, 167.0, 89.9.

(4) A. W. Freeman, M. Urvoy and M. E. Criswell, *J. Org. Chem.*, 2005, **70**, 5014-5019.

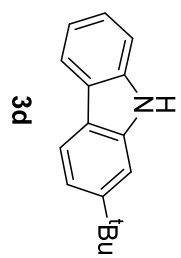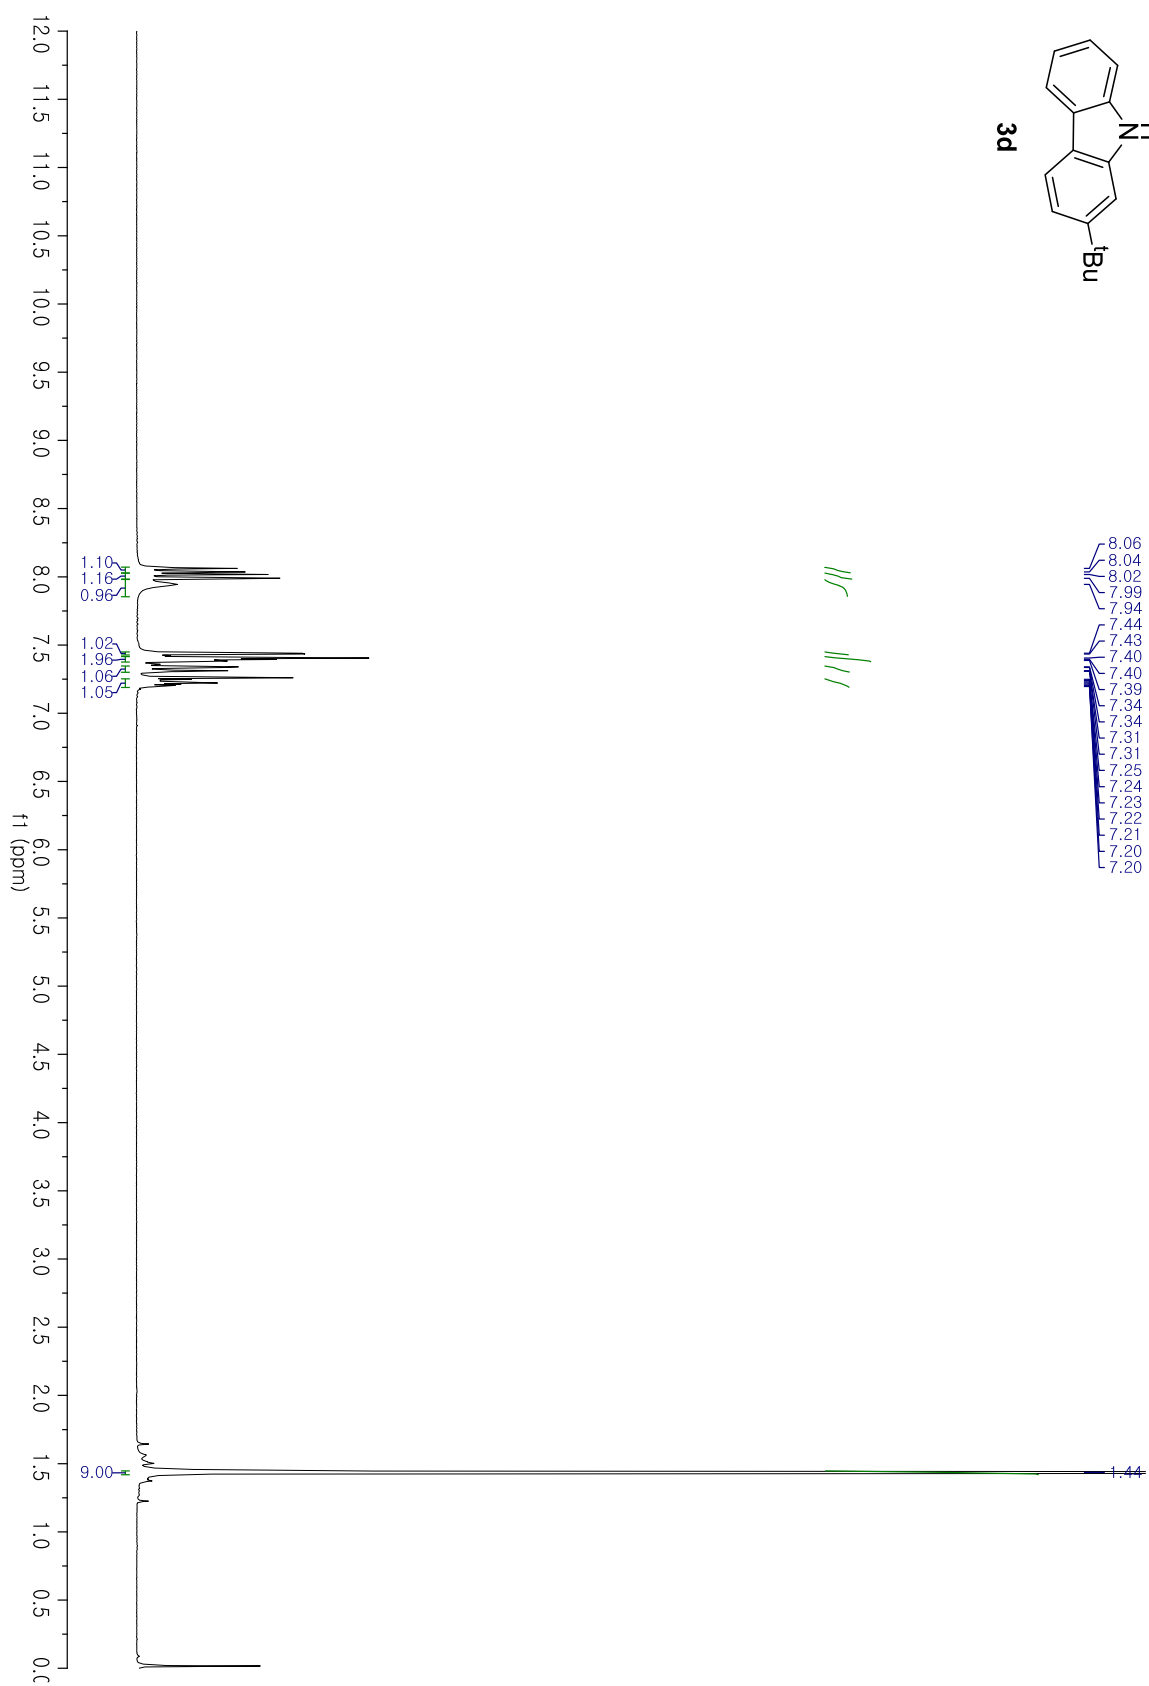

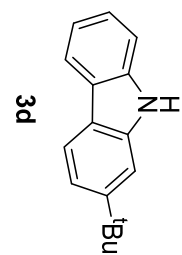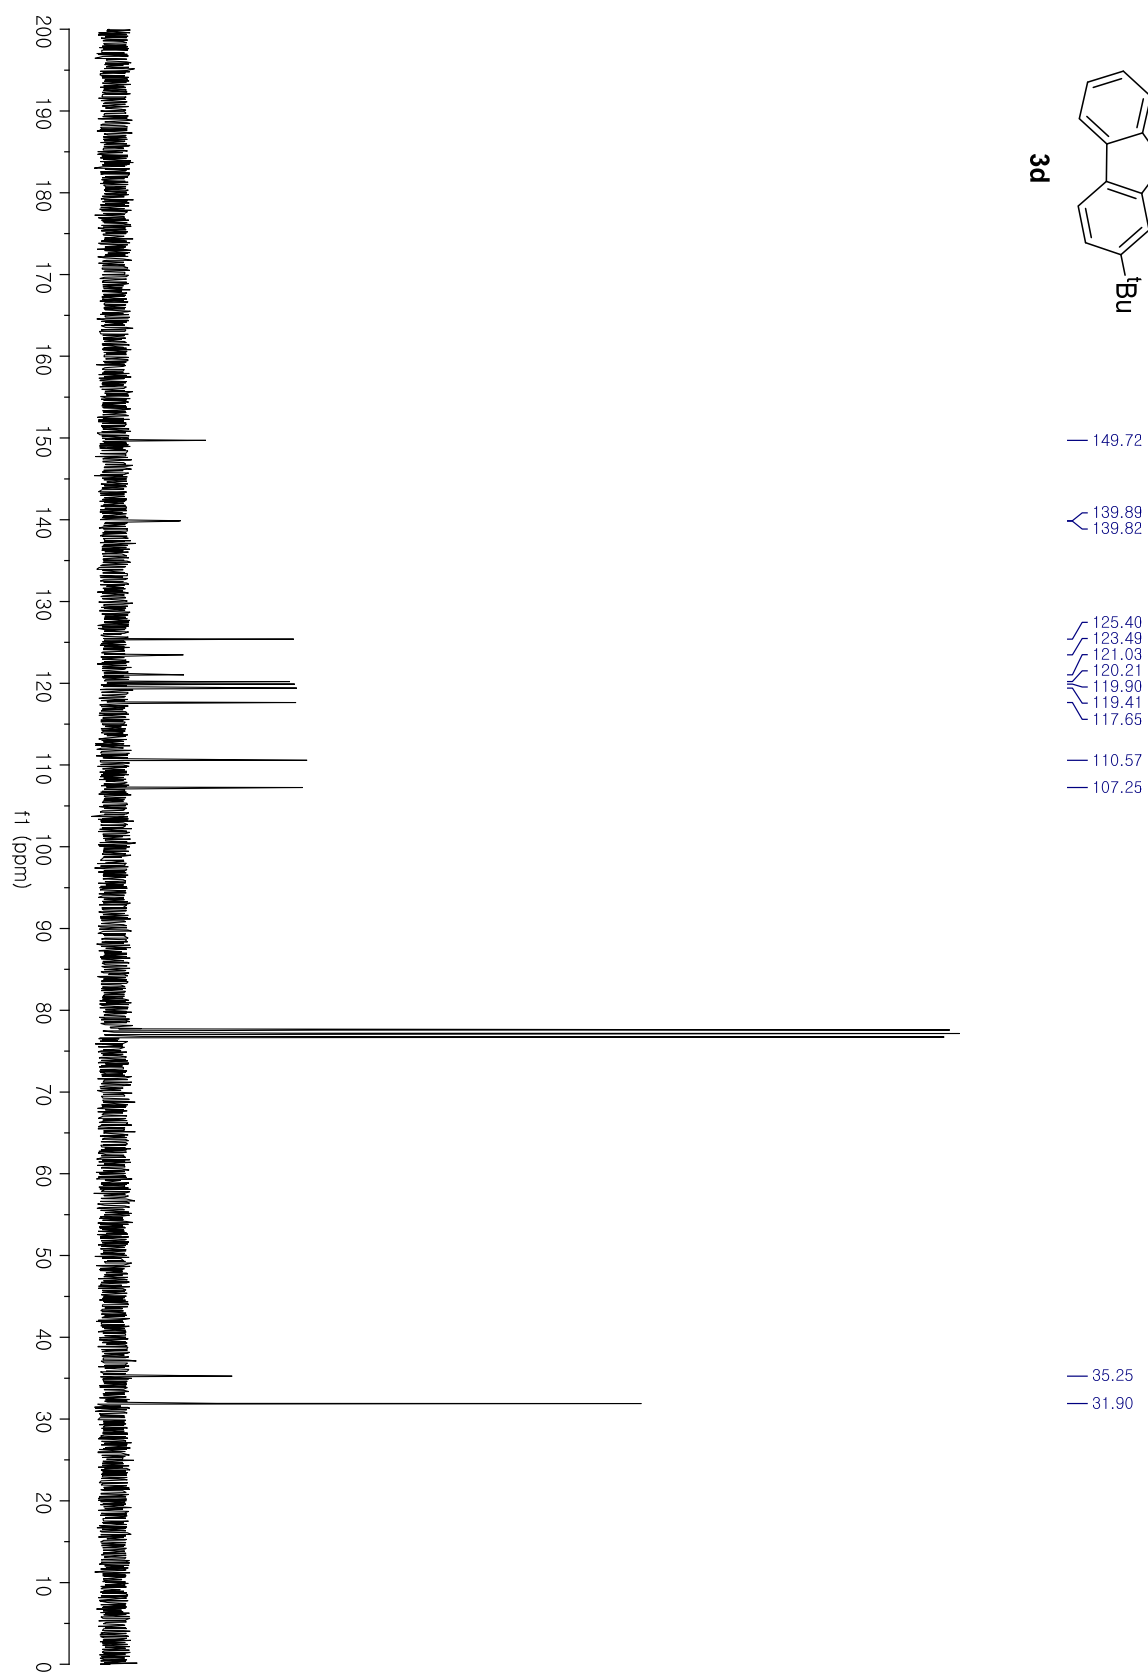

## **2-Phenyl-9H-carbazole (3e)**

From reaction of 1-bromo-2-nitrobenzene **1b** with [1,1'-biphenyl]-4-ylboronic acid **2e**

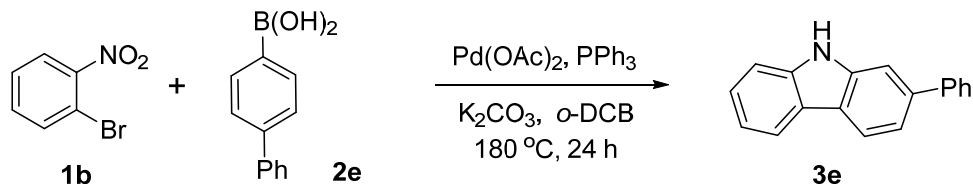

To a re-sealable pressure tube (13 x 100 mm) equipped with magnetic stir bar were added 1-bromo-2-nitrobenzene **1b** (100 mg, 0.5 mmol, 100 mol%), [1,1'-biphenyl]-4-ylboronic acid **2e** (129 mg, 0.65 mmol, 130 mol%), Pd(OAc)<sub>2</sub> (2.2 mg, 0.01 mmol, 2 mol%), PPh<sub>3</sub> (328 mg, 1.25 mmol, 250 mol %), K<sub>2</sub>CO<sub>3</sub> (138 mg, 1 mmol, 200 mol%) and *o*-DCB (1 mL, 0.5 M concentration with respect to 1-bromo-2-nitrobenzene **1b**). The mixture was heated at 180 °C (oil bath temperature) for 24 hr, at which point the reaction mixture was allowed to cool to ambient temperature. The reaction mixture was filtered through a pad of celite and the resulting liquor was concentrated *in vacuo* and purified by flash column chromatography (SiO<sub>2</sub>) using 5% acetone in hexanes as eluant to give **3e** as a white solid (110 mg, 90% yield). <sup>1</sup>H and <sup>13</sup>C NMR data were consistent with literature values.<sup>2, 5</sup>

**TLC (SiO<sub>2</sub>)**: R<sub>f</sub> = 0.37 (acetone:hexanes, 1:5).

**<sup>1</sup>H NMR** (300 MHz, Acetone-d<sub>6</sub>) δ 10.50 (s, 1H), 8.19 (d, *J* = 8.1 Hz, 1H), 8.14 (d, *J* = 7.7 Hz, 1H), 7.80 – 7.71 (m, 3H), 7.57 – 7.32 (m, 6H), 7.21 (td, *J* = 8.2, 4.3 Hz, 1H).

**<sup>13</sup>C NMR** (75 MHz, DMSO): δ 141.26, 140.43, 140.35, 137.88, 128.99, 127.12, 127.06, 125.70, 122.23, 121.88, 120.68, 120.32, 118.76, 117.89, 111.06, 108.93.

**FTIR** (neat) ν 3377, 3268, 1692, 1528, 1367, 1227 cm<sup>-1</sup>.

**LRMS** *m/z* (EI): 242.8 (M<sup>+</sup>-1), 120.3, 76.7, 50.9.

(2) B. Alcaide, P. Almendros, J. M. Alonso, M. T. Quirós and P. Gadziński, *Adv. Synth. Catal.*, 2011, **353**, 1871-1876.

(5) K. Takamatsu, K. Hirano, T. Satoh and M. Miura, *Org. Lett.*, 2014, **16**, 2892-2895.



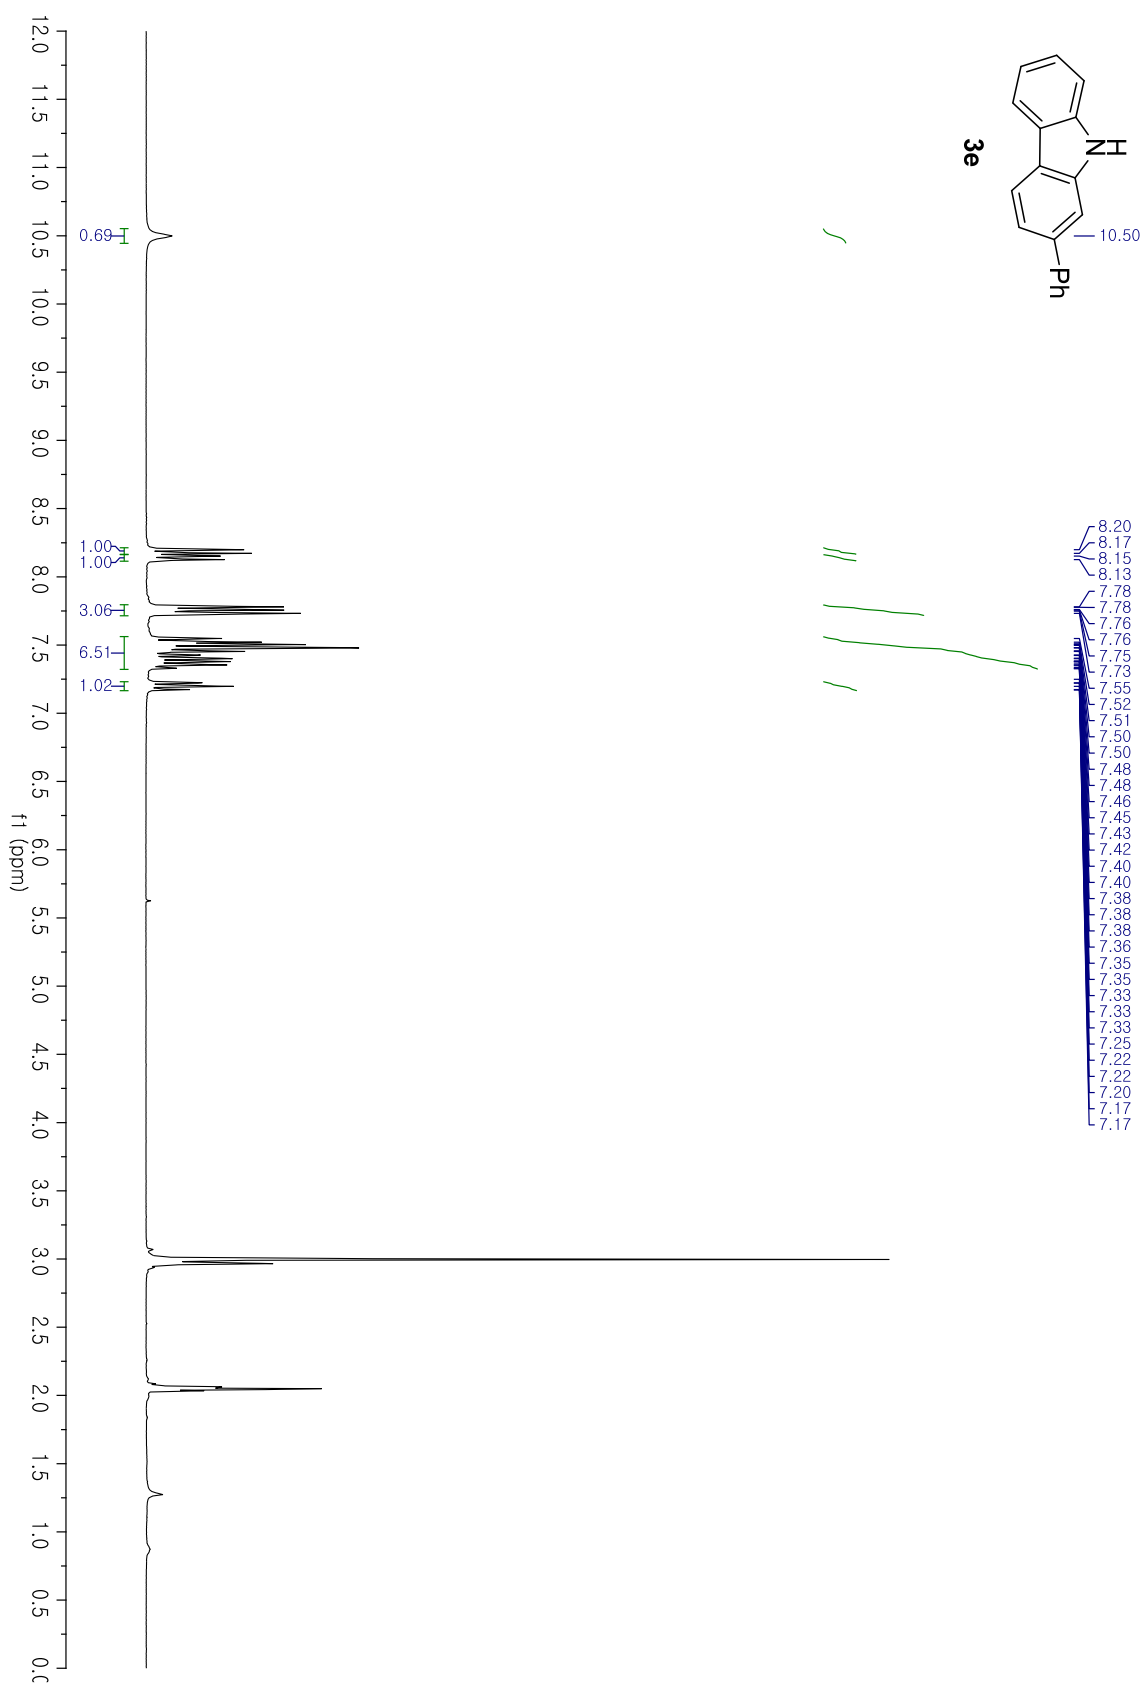

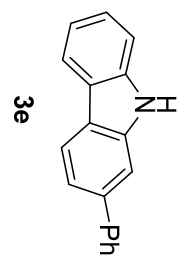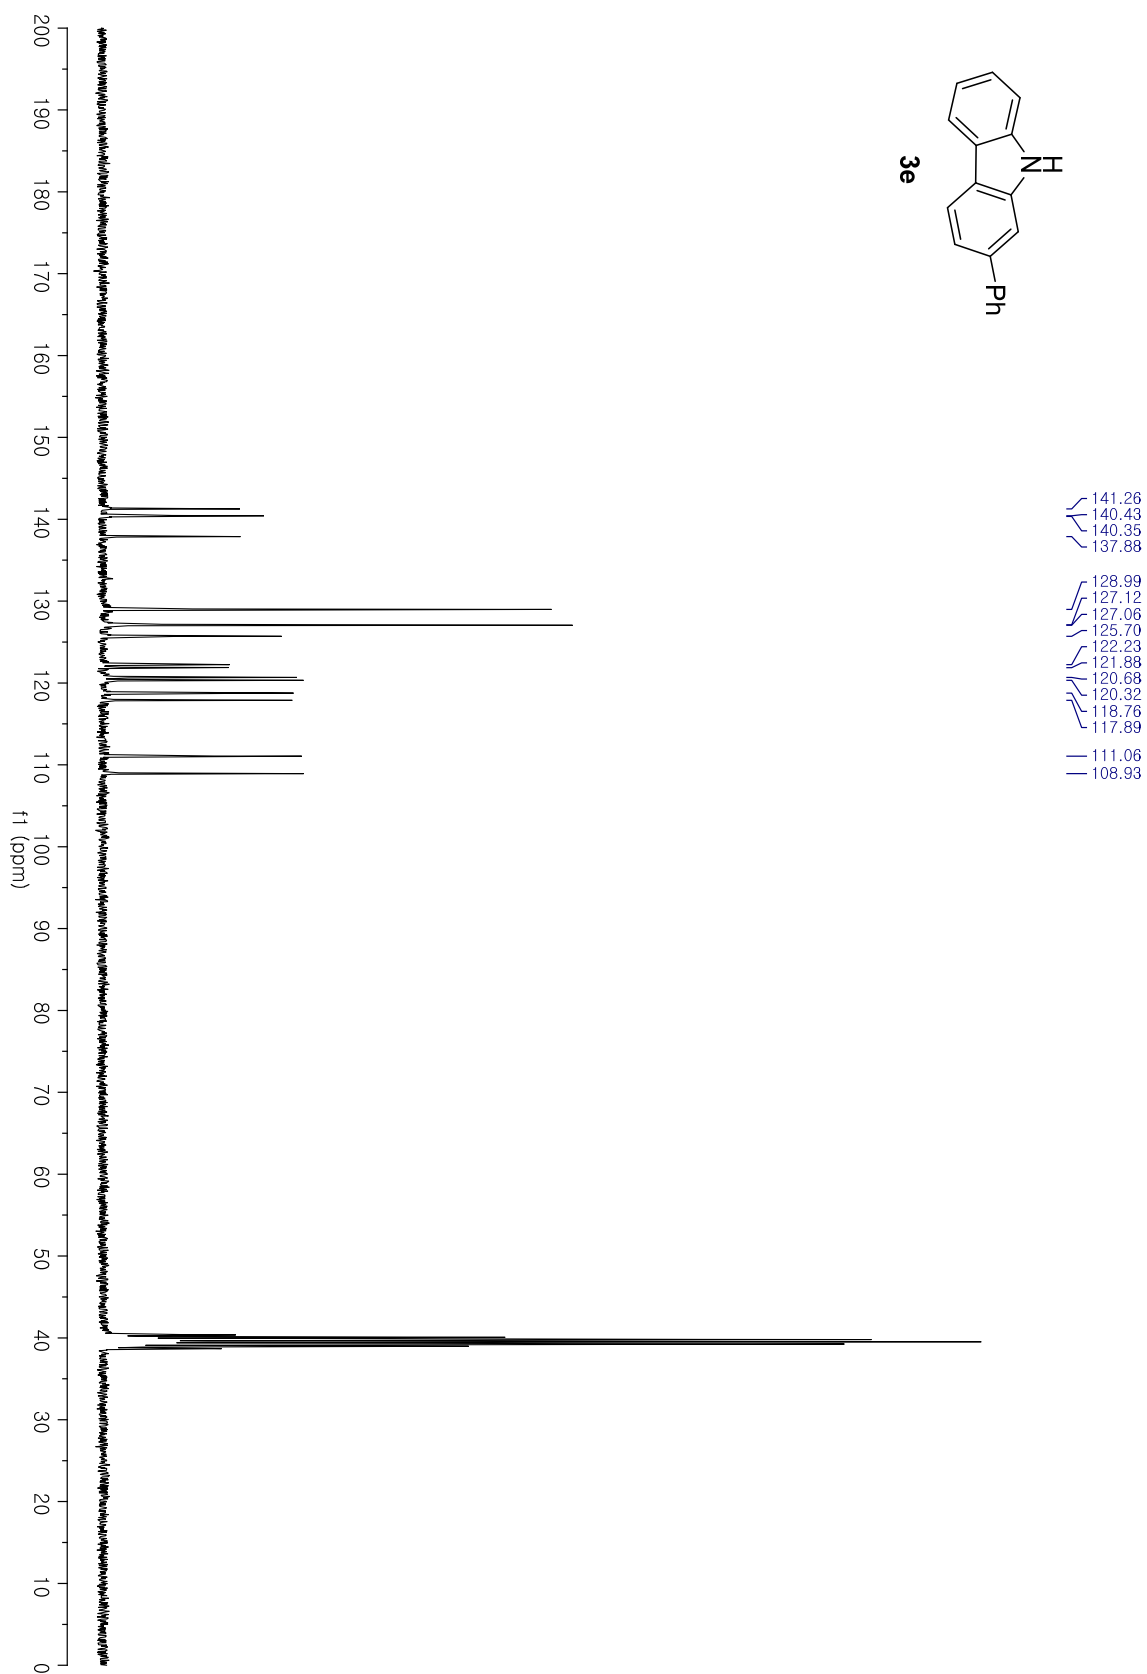

### 7H-Benzo[c]carbazole (3f)

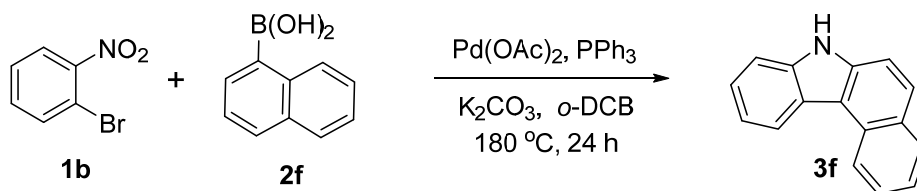

To a re-sealable pressure tube (13 x 100 mm) equipped with magnetic stir bar were added 1-bromo-2-nitrobenzene **1b** (100 mg, 0.5 mmol, 100 mol%), naphthalen-1-ylboronic acid **2f** (122 mg, 0.65 mmol, 130 mol%), Pd(OAc)<sub>2</sub> (2.2 mg, 0.01 mmol, 2 mol%), PPh<sub>3</sub> (328 mg, 1.25 mmol, 250 mol %), K<sub>2</sub>CO<sub>3</sub> (138 mg, 1 mmol, 200 mol%) and *o*-DCB (1 mL, 0.5 M concentration with respect to 1-bromo-2-nitrobenzene **1b**). The mixture was heated at 180 °C (oil bath temperature) for 24 hr, at which point the reaction mixture was allowed to cool to ambient temperature. The reaction mixture was filtered through a pad of celite and the resulting liquor was concentrated *in vacuo* and purified by flash column chromatography (SiO<sub>2</sub>) using 5% acetone in hexanes as eluant to give **3f** as a white solid (91 mg, 84% yield). <sup>1</sup>H and <sup>13</sup>C NMR data were consistent with literature values.<sup>6</sup>

**TLC (SiO<sub>2</sub>):** R<sub>f</sub> = 0.40 (acetone:hexanes, 1:5).

**<sup>1</sup>H NMR** (300 MHz, CDCl<sub>3</sub>) δ 8.79 (d, *J* = 8.3 Hz, 1H), 8.58 (d, *J* = 7.8 Hz, 1H), 8.44 (s, 1H), 8.01 (d, *J* = 8.1 Hz, 1H), 7.87 (d, *J* = 8.8 Hz, 1H), 7.75 – 7.68 (m, 1H), 7.65 (d, *J* = 8.8 Hz, 1H), 7.59 (d, *J* = 7.8 Hz, 1H), 7.52 – 7.43 (m, 2H), 7.43 – 7.36 (m, 1H).

**<sup>13</sup>C NMR** (75 MHz, CDCl<sub>3</sub>) δ 138.52, 137.16, 130.03, 129.32, 127.55, 127.01, 124.46, 124.09, 123.38, 123.13, 122.16, 120.36, 115.54, 112.71, 111.25.

**FTIR** (neat) ν 3396, 2920, 1876, 1465, 1267, 1120 cm<sup>-1</sup>.

**LRMS** *m/z* (EI): 217.7 (M<sup>+</sup>+1), 216.8, 188.8, 108.2, 95.3.

(6) C. Wang, W. Zhang, S. Lu, J. Wu and Z. Shi, *Chem. Commun.*, 2008, 5176-5178.

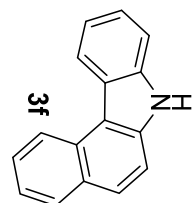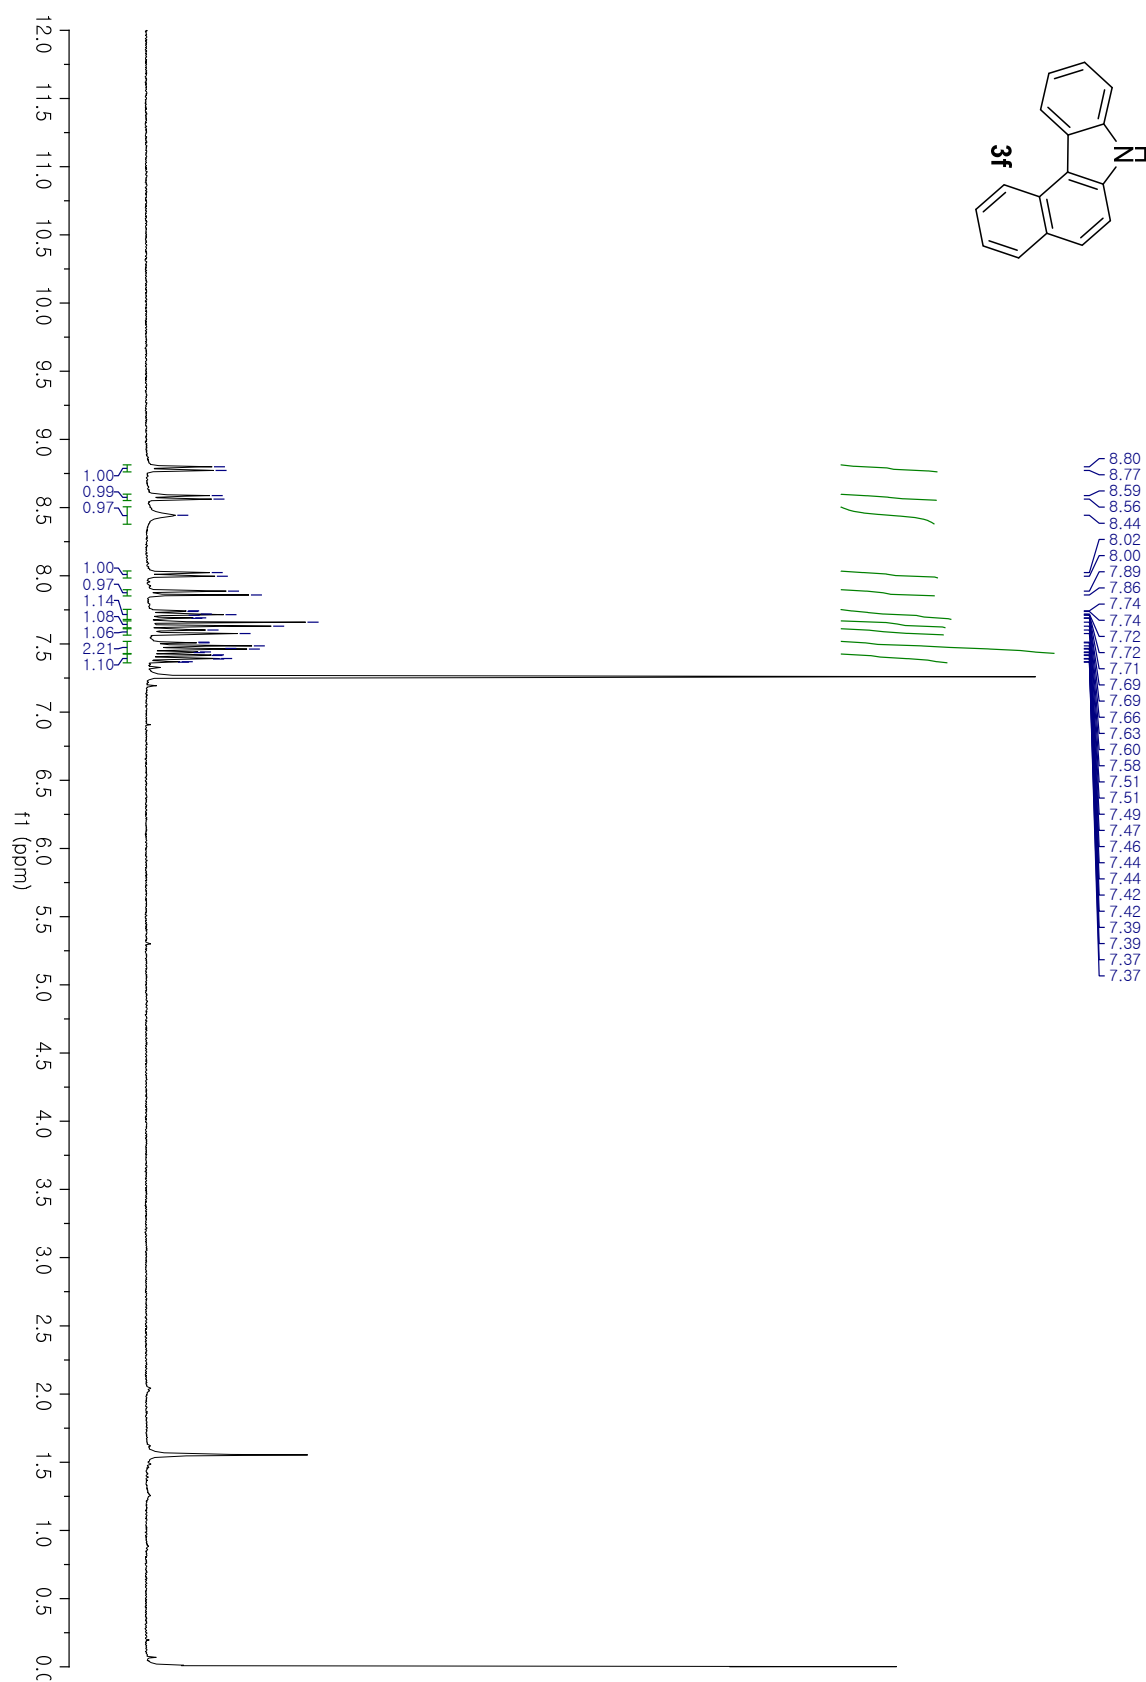

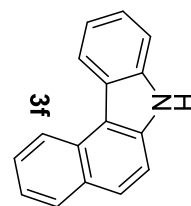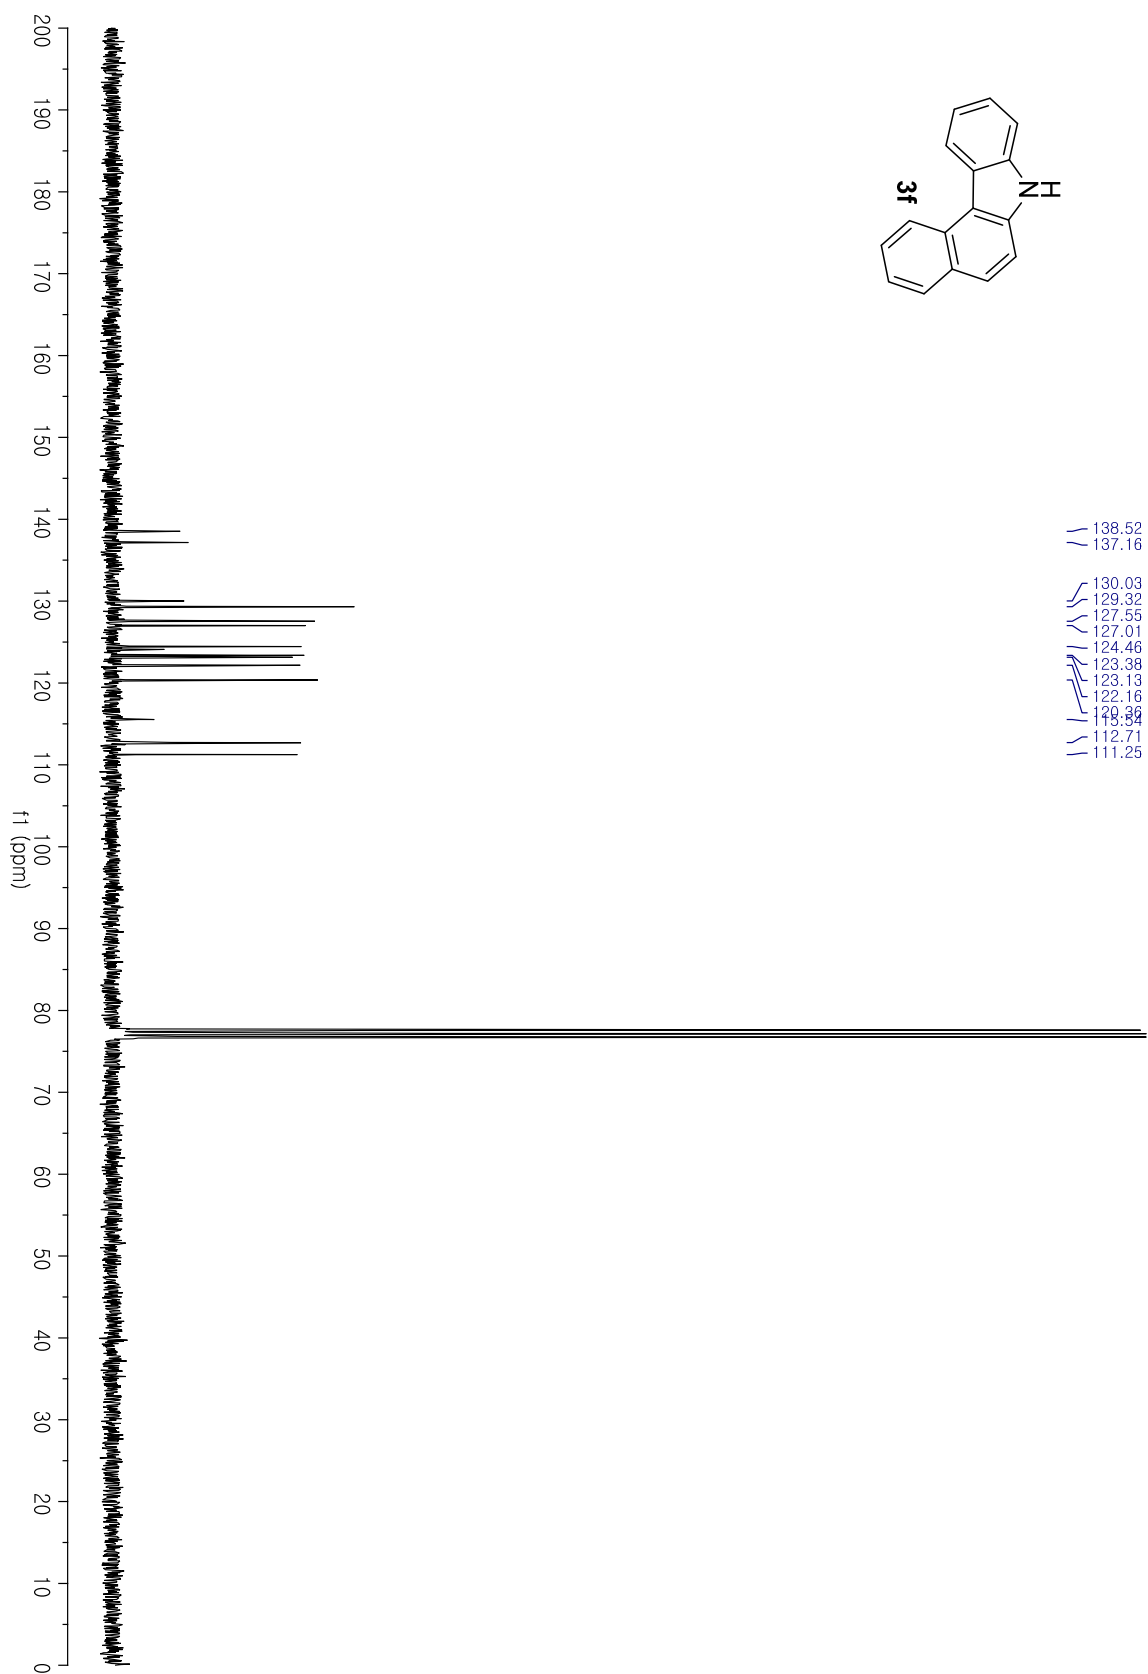

### 2-Methoxy-9H-carbazole (3g)

From reaction of 1-bromo-2-nitrobenzene **1b** with (4-methoxyphenyl)boronic acid **2g**

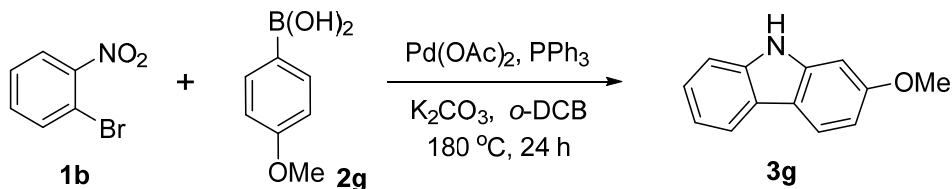

To a re-sealable pressure tube (13 x 100 mm) equipped with magnetic stir bar were added 1-bromo-2-nitrobenzene **1b** (100 mg, 0.5 mmol, 100 mol%), (4-methoxyphenyl)boronic acid **2g** (99 mg, 0.65 mmol, 130 mol%), Pd(OAc)<sub>2</sub> (2.2 mg, 0.01 mmol, 2 mol%), PPh<sub>3</sub> (328 mg, 1.25 mmol, 250 mol %), K<sub>2</sub>CO<sub>3</sub> (138 mg, 1 mmol, 200 mol%) and *o*-DCB (1 mL, 0.5 M concentration with respect to 1-bromo-2-nitrobenzene **1b**). The mixture was heated at 180 °C (oil bath temperature) for 24 hr, at which point the reaction mixture was allowed to cool to ambient temperature. The reaction mixture was filtered through a pad of celite and the resulting liquor was concentrated *in vacuo* and purified by flash column chromatography (SiO<sub>2</sub>) using 5% acetone in hexanes as eluant to give **3g** as a white solid (76 mg, 77% yield). <sup>1</sup>H and <sup>13</sup>C NMR data were consistent with literature values.<sup>7</sup>

From reaction of 1-bromo-4-methoxy-2-nitrobenzene **1g** with phenylboronic acid **2a**

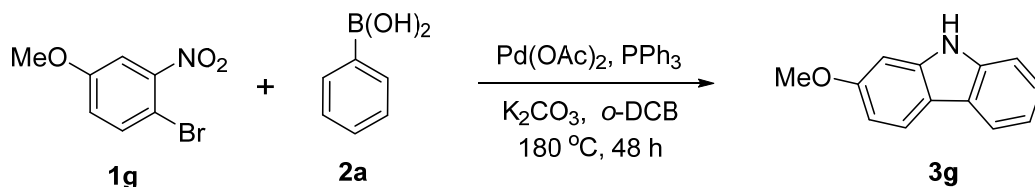

To a re-sealable pressure tube (13 x 100 mm) equipped with magnetic stir bar were added 1-bromo-4-methoxy-2-nitrobenzene **1g** (120 mg, 0.5 mmol, 100 mol%), phenylboronic acid **2a** (94 mg, 0.65 mmol, 130 mol%), Pd(OAc)<sub>2</sub> (2.2 mg, 0.01 mmol, 2 mol%), PPh<sub>3</sub> (328 mg, 1.25 mmol, 250 mol %), K<sub>2</sub>CO<sub>3</sub> (138 mg, 1 mmol, 200 mol%) and *o*-DCB (1 mL, 0.5 M concentration with respect to 1-bromo-4-methoxy-2-nitrobenzene **1g**). The mixture was heated at 180 °C (oil bath temperature) for 48 hr, at which point the reaction mixture was allowed to cool to ambient temperature. The reaction mixture was filtered through a pad of celite and the resulting liquor was concentrated *in vacuo* and purified by flash column chromatography (SiO<sub>2</sub>) using 5% acetone in hexanes as eluant to give **3g** as a white solid (72 mg, 73% yield).

(7) T. Watanabe, S. Oishi, N. Fujii and H. Ohno, *J. Org. Chem.*, 2009, **74**, 4720-4726.

**TLC (SiO<sub>2</sub>)**: R<sub>f</sub> = 0.26 (acetone:hexanes, 1:5).

**<sup>1</sup>H NMR** (300 MHz, CDCl<sub>3</sub>) δ 7.99 (s, 1H), 7.96 (d, *J* = 3.4 Hz, 1H), 7.94 (d, *J* = 8.6 Hz, 1H), 7.41 – 7.31 (m, 1H), 7.24 – 7.18 (m, 1H), 6.92 (d, *J* = 2.1 Hz, 1H), 6.86 (dd, *J* = 8.5, 2.2 Hz, 1H), 3.91 (s, 1H).

**<sup>13</sup>C NMR** (75 MHz, CDCl<sub>3</sub>) δ 159.21, 140.93, 139.63, 124.69, 123.67, 121.19, 119.70, 119.63, 117.39, 110.44, 108.29, 94.83, 55.77.

**FTIR** (neat) ν 3395, 1336, 1200, 1030 cm<sup>-1</sup>.

**LRMS** *m/z* (EI): 197.7 (M<sup>+</sup>+1), 196.7, 181.8, 153.8, 127.8.

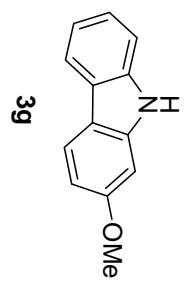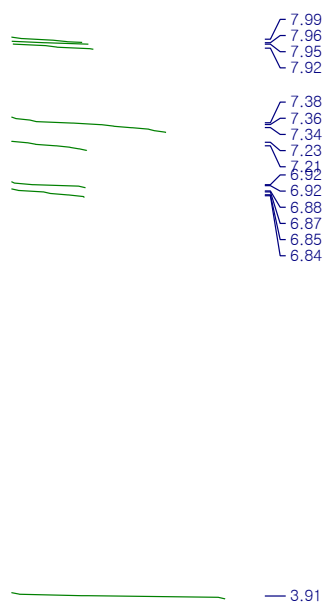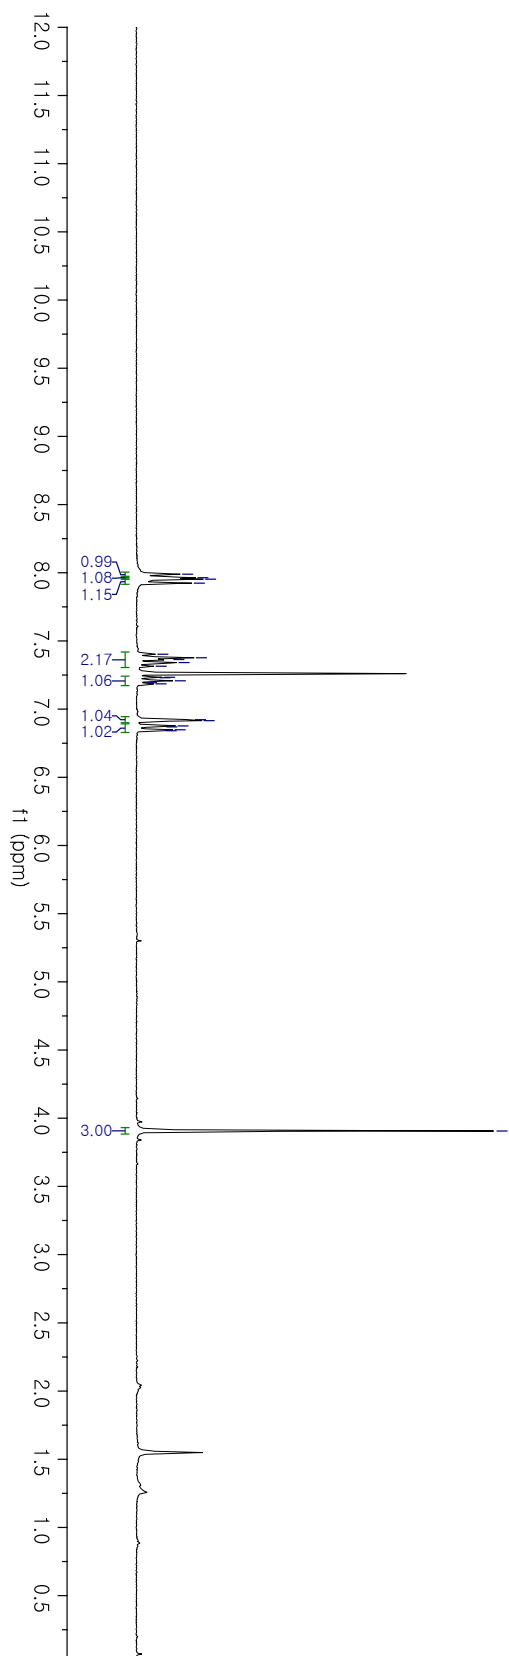



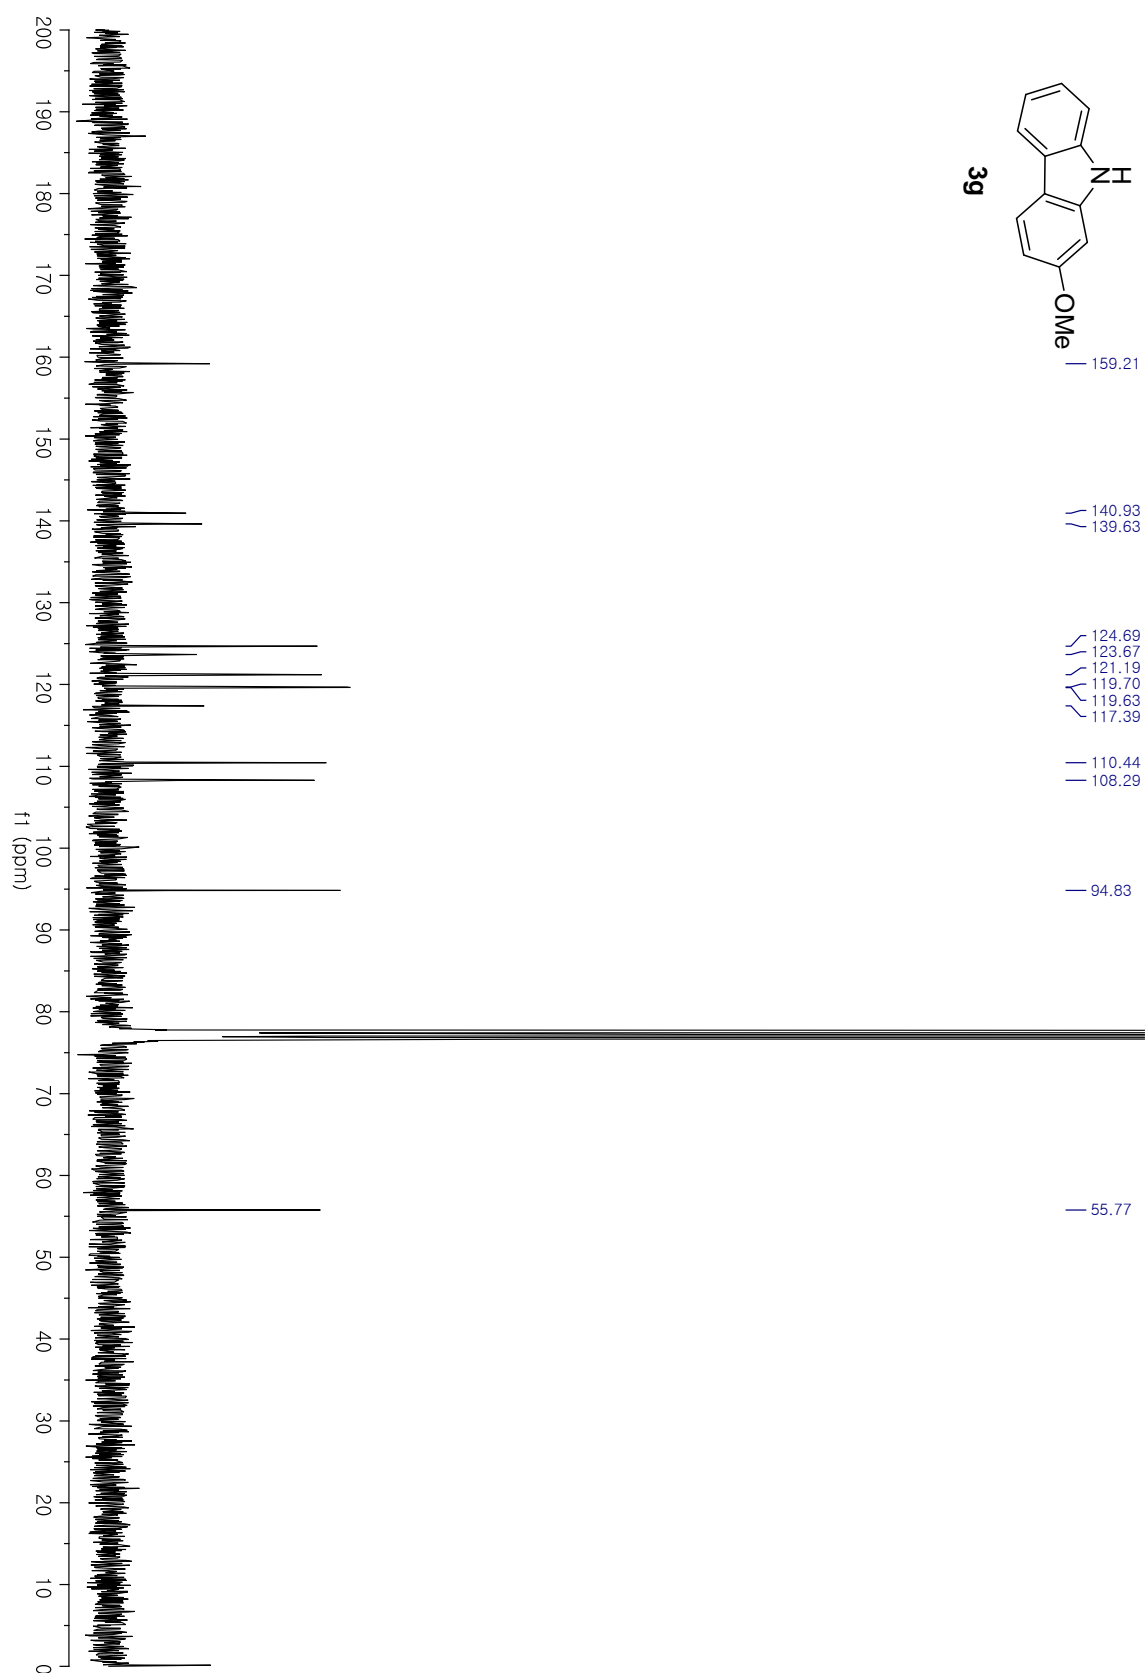

#### 4-Methoxy-9H-carbazole (3h)

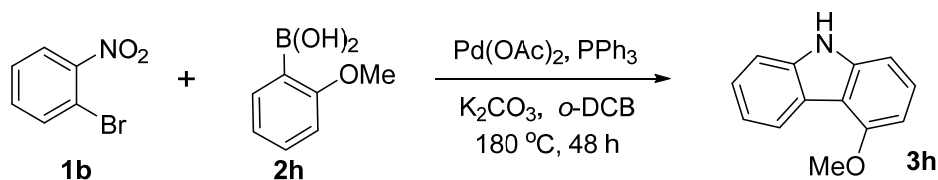

To a re-sealable pressure tube (13 x 100 mm) equipped with magnetic stir bar were added 1-bromo-2-nitrobenzene **1b** (100 mg, 0.5 mmol, 100 mol%), (2-methoxyphenyl)boronic acid **2h** (99 mg, 0.65 mmol, 130 mol%), Pd(OAc)<sub>2</sub> (2.2 mg, 0.01 mmol, 2 mol%), PPh<sub>3</sub> (328 mg, 1.25 mmol, 250 mol %), K<sub>2</sub>CO<sub>3</sub> (138 mg, 1 mmol, 200 mol%) and *o*-DCB (1 mL, 0.5 M concentration with respect to 1-bromo-2-nitrobenzene **1**). The mixture was heated at 180 °C (oil bath temperature) for 48 hr, at which point the reaction mixture was allowed to cool to ambient temperature. The reaction mixture was filtered through a pad of celite and the resulting liquor was concentrated *in vacuo* and purified by flash column chromatography (SiO<sub>2</sub>) using 5% acetone in hexanes as eluant to give **3h** as a white solid (66 mg, 67% yield). <sup>1</sup>H and <sup>13</sup>C NMR data were consistent with literature values.<sup>8</sup>

**TLC (SiO<sub>2</sub>):** R<sub>f</sub> = 0.26 (acetone:hexanes, 1:5).

**<sup>1</sup>H NMR** (300 MHz, CDCl<sub>3</sub>) δ 8.34 (d, *J* = 7.8 Hz, 1H), 8.02 (s, 1H), 7.43 – 7.38 (m, 2H), 7.34 (d, *J* = 8.0 Hz, 1H), 7.30 – 7.21 (m, 1H), 7.04 (d, *J* = 8.1 Hz, 1H), 6.70 (d, *J* = 8.0 Hz, 1H), 4.09 (s, 3H).

**<sup>13</sup>C NMR** (75 MHz, CDCl<sub>3</sub>): δ 156.32, 140.92, 138.72, 126.77, 125.01, 123.12, 122.67, 119.70, 112.60, 110.07, 103.62, 100.42, 55.51.

**FTIR** (neat) ν 3386, 2938, 1405, 1248, 1184, 1045 cm<sup>-1</sup>.

**LRMS** *m/z* (EI): 197.8 (M<sup>+</sup>+1), 196.7, 181.9, 153.9, 128.0.

(8) S. Chakrabarty, I. Chatterjee, L. Tebben and A. Studer, *Angew. Chem. Int. Ed.*, 2013, **52**, 2968-2971.

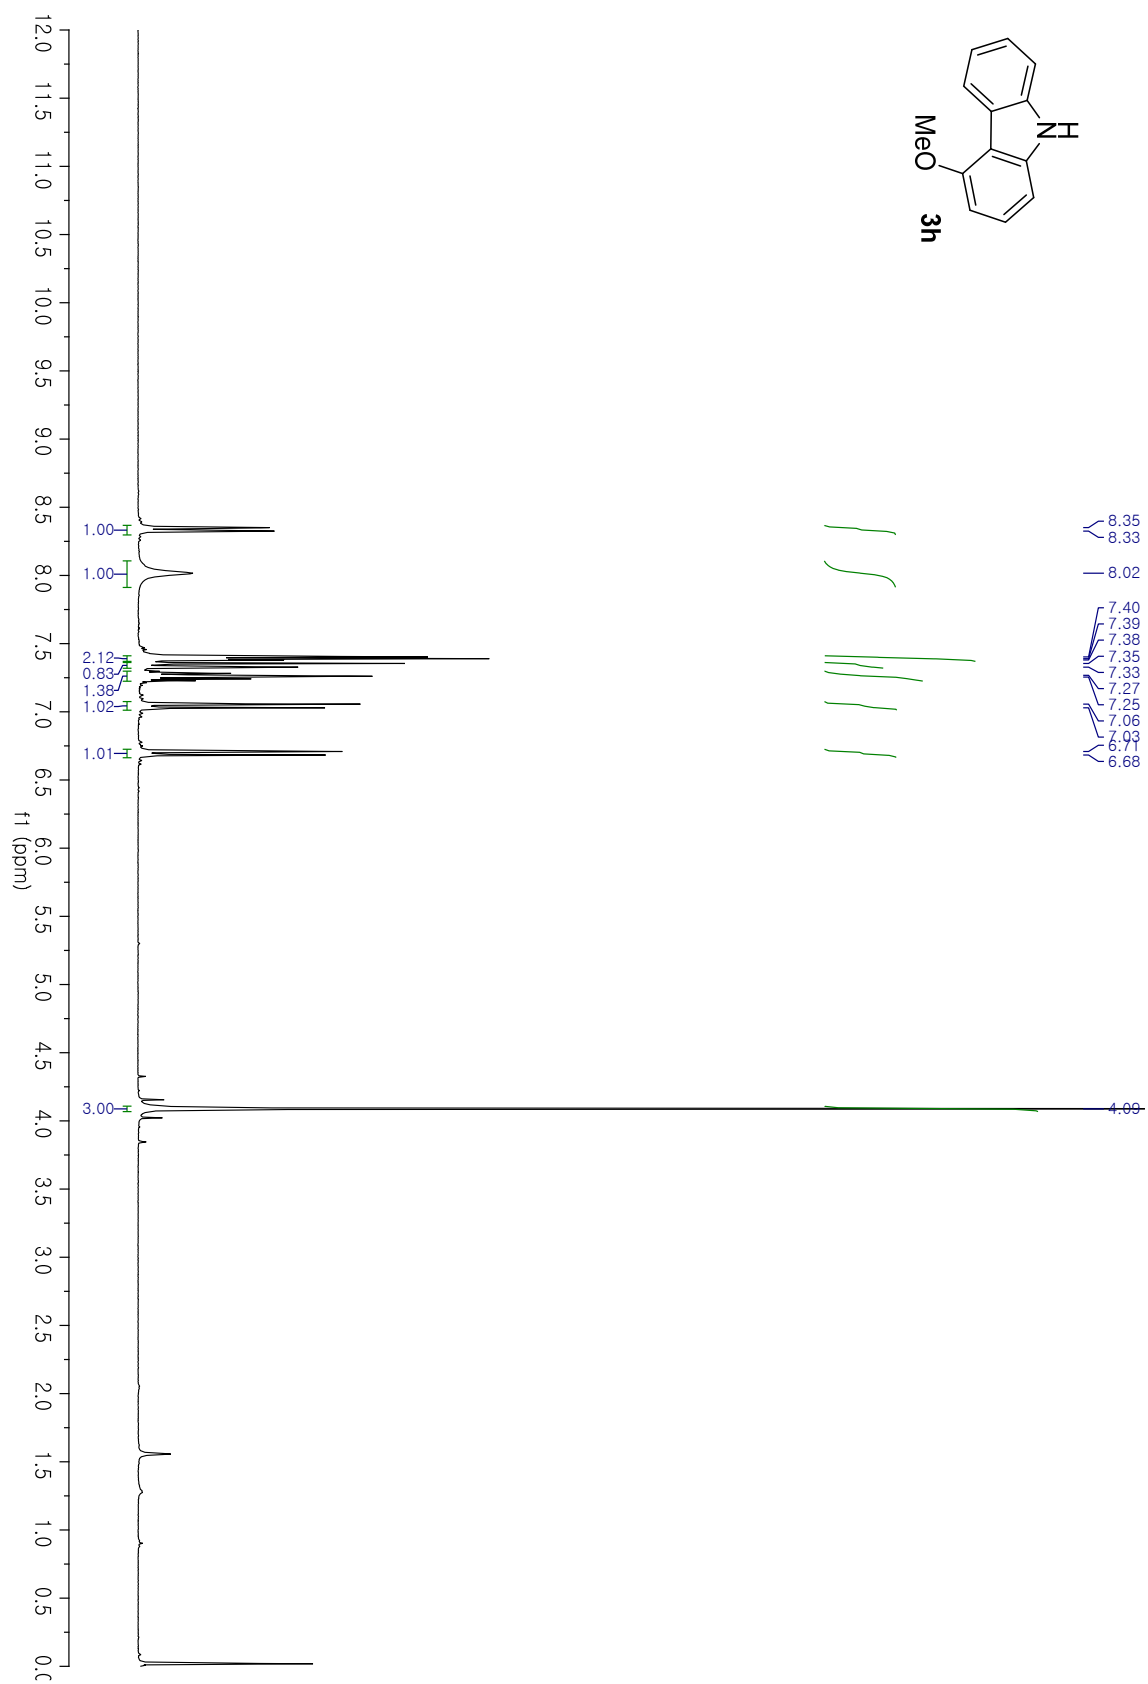

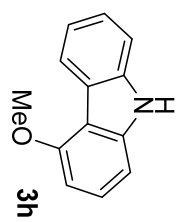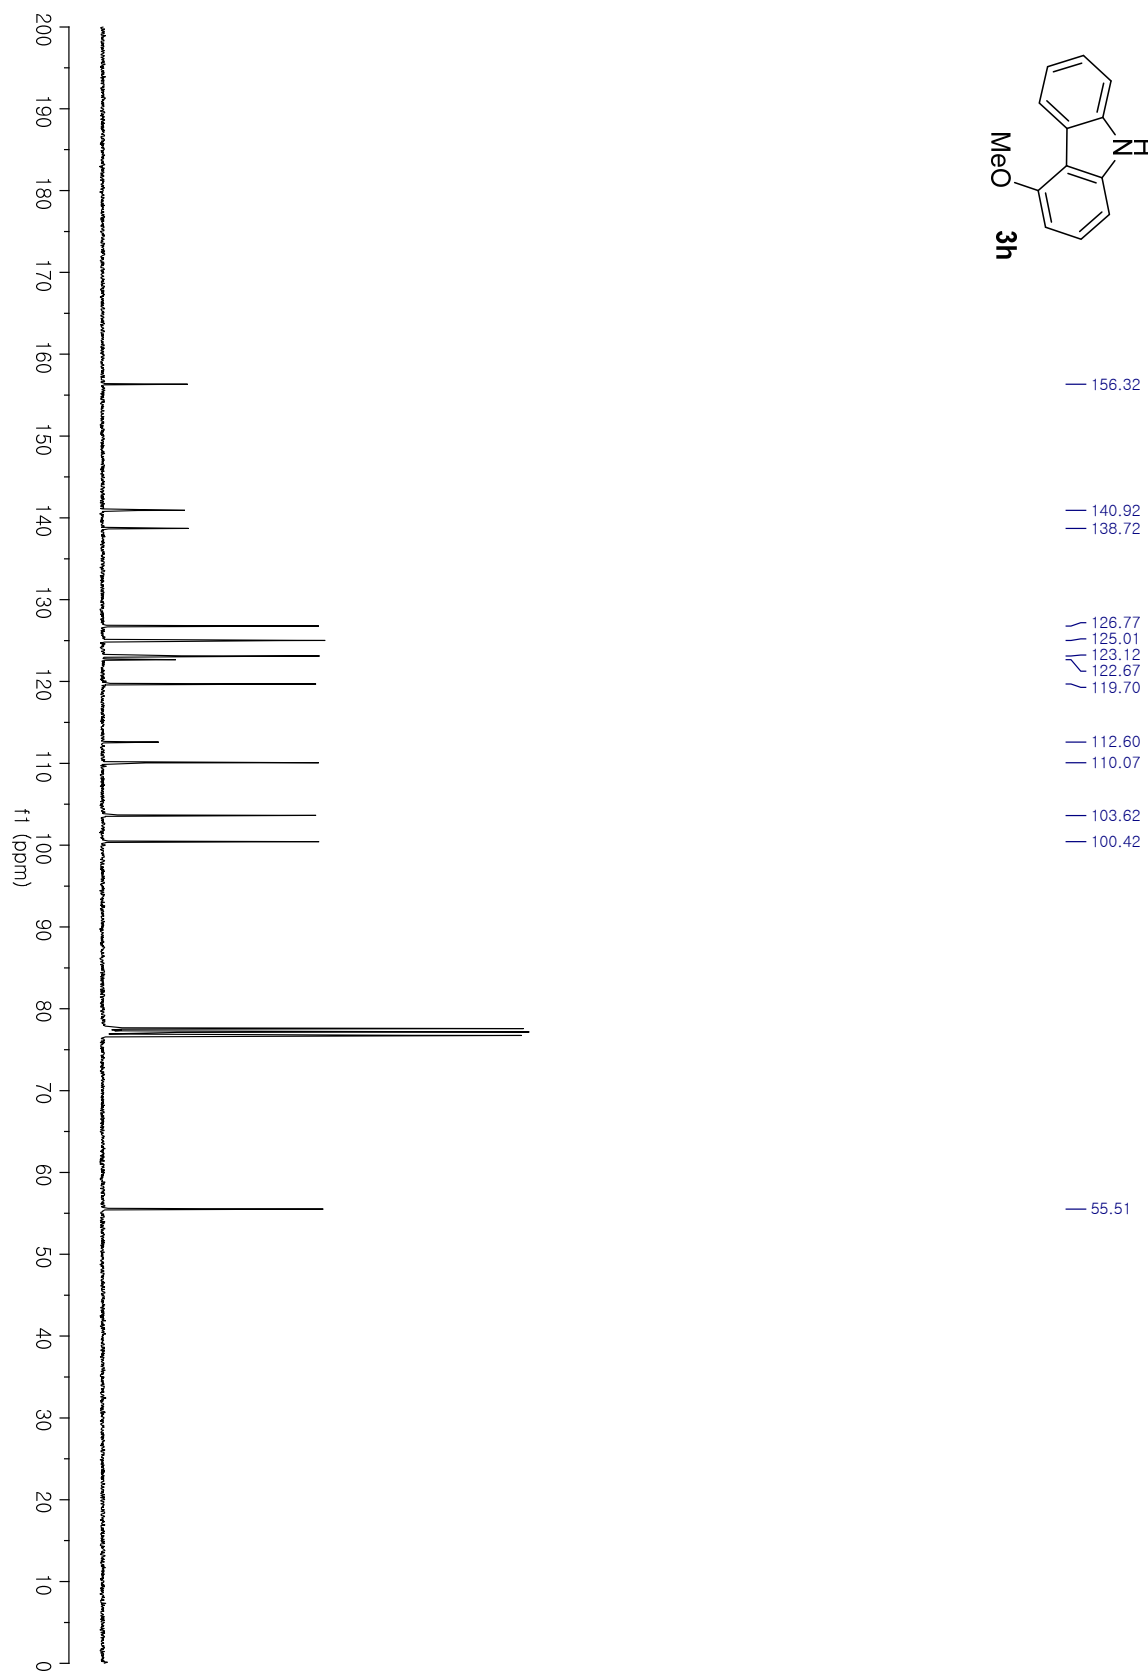

### 2-Chloro-9H-carbazole (3i)

From reaction of 1-bromo-2-nitrobenzene **1b** with (4-chlorophenyl)boronic acid **2i**

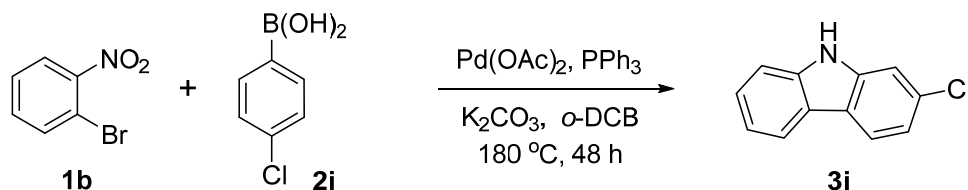

To a re-sealable pressure tube (13 x 100 mm) equipped with magnetic stir bar were added 1-bromo-2-nitrobenzene **1b** (100 mg, 0.5 mmol, 100 mol%), (4-chlorophenyl)boronic acid **2i** (102 mg, 0.65 mmol, 130 mol%), Pd(OAc)<sub>2</sub> (2.2 mg, 0.01 mmol, 2 mol%), PPh<sub>3</sub> (328 mg, 1.25 mmol, 250 mol %), K<sub>2</sub>CO<sub>3</sub> (138 mg, 1 mmol, 200 mol%) and *o*-DCB (1 mL, 0.5 M concentration with respect to 1-bromo-2-nitrobenzene **1b**). The mixture was heated at 180 °C (oil bath temperature) for 48 hr, at which point the reaction mixture was allowed to cool to ambient temperature. The reaction mixture was filtered through a pad of celite and the resulting liquor was concentrated *in vacuo* and purified by flash column chromatography (SiO<sub>2</sub>) using 5% acetone in hexanes as eluant to give **3i** as a white solid (71 mg, 70% yield). <sup>1</sup>H and <sup>13</sup>C NMR data were consistent with literature values.<sup>1</sup>

From reaction of 1-bromo-4-chloro-2-nitrobenzene **1i** with phenylboronic acid **2a**

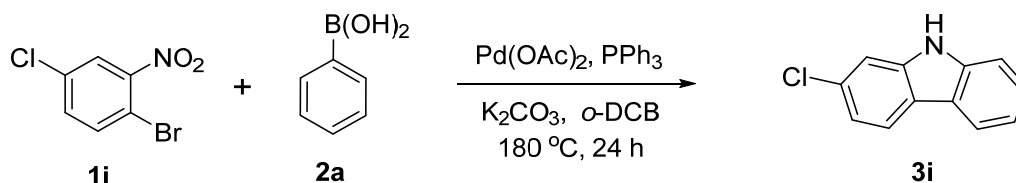

To a re-sealable pressure tube (13 x 100 mm) equipped with magnetic stir bar were added 1-bromo-4-chloro-2-nitrobenzene **1i** (113 mg, 0.5 mmol, 100 mol%), phenylboronic acid **2a** (94 mg, 0.65 mmol, 130 mol%), Pd(OAc)<sub>2</sub> (5.6 mg, 0.025 mmol, 5 mol%), PPh<sub>3</sub> (328 mg, 1.25 mmol, 250 mol %), K<sub>2</sub>CO<sub>3</sub> (138 mg, 1 mmol, 200 mol%) and *o*-DCB (1 mL, 0.5 M concentration with respect to 1-bromo-4-chloro-2-nitrobenzene **1i**). The mixture was heated at 180 °C (oil bath temperature) for 24 hr, at which point the reaction mixture was allowed to cool to ambient temperature. The reaction mixture was filtered through a pad of celite and the resulting liquor was concentrated *in vacuo* and purified by flash column chromatography (SiO<sub>2</sub>) using 5% acetone in hexanes as eluant to give **3i** as a white solid (68 mg, 67% yield).

(1) C. Suzuki, K. Hirano, T. Satoh and M. Miura, *Org. Lett.*, 2015, **17**, 1597-1600.

**TLC (SiO<sub>2</sub>)**: R<sub>f</sub> = 0.38 (acetone:hexanes, 1:5).

**<sup>1</sup>H NMR** (300 MHz, DMSO) δ 11.43 (s, 1H), 8.12 (d, *J* = 8.2 Hz, 2H), 7.54 – 7.49 (m, 2H), 7.40 (t, *J* = 7.5 Hz, 1H), 7.20 – 7.14 (m, 2H).

**<sup>13</sup>C NMR** (75 MHz, DMSO) δ 140.30, 140.08, 129.88, 125.98, 121.81, 121.57, 121.31, 120.35, 119.09, 118.68, 111.23, 110.61.

**FTIR** (neat) ν 3393, 3128, 1636, 1406, 1321, 1178, 754 cm<sup>-1</sup>.

**LRMS** *m/z* (EI): 200.7 (M<sup>+</sup>-1), 165.7, 138.8, 100.3.

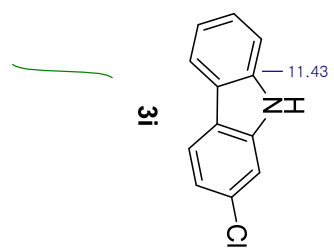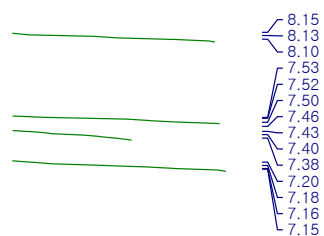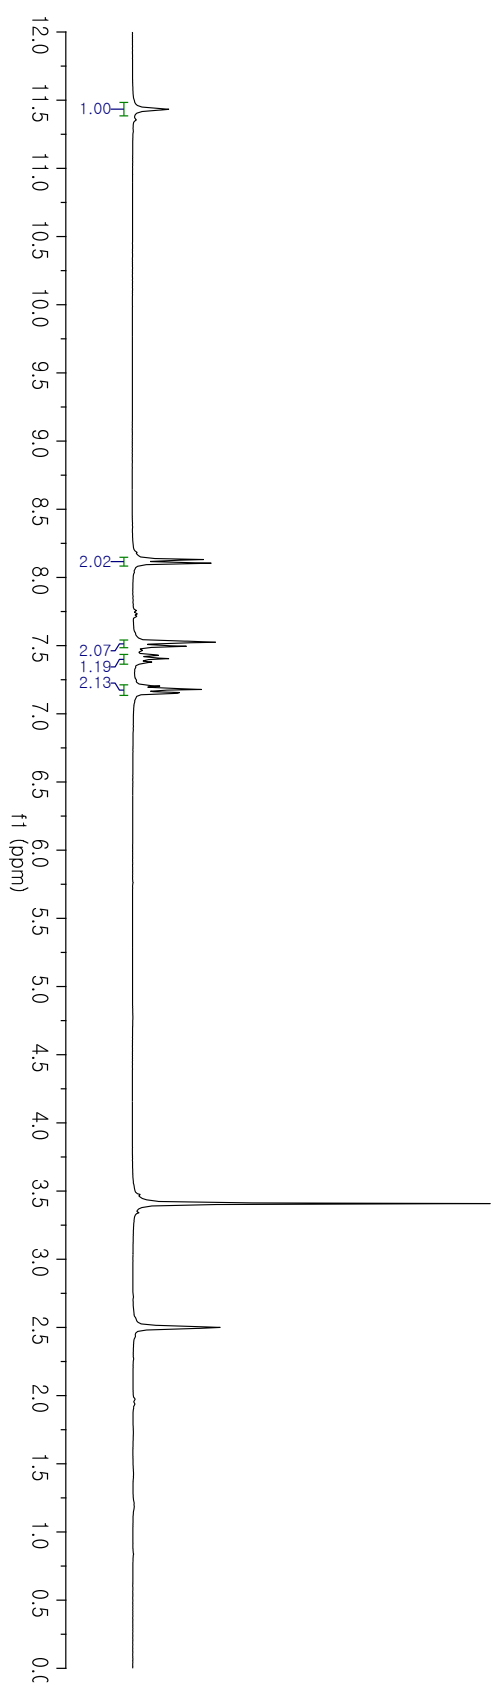

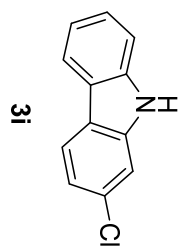

|  |        |
|--|--------|
|  | 140.30 |
|  | 140.08 |
|  | 129.88 |
|  | 125.86 |
|  | 121.81 |
|  | 121.57 |
|  | 121.31 |
|  | 120.35 |
|  | 119.09 |
|  | 118.68 |
|  | 111.23 |
|  | 110.61 |

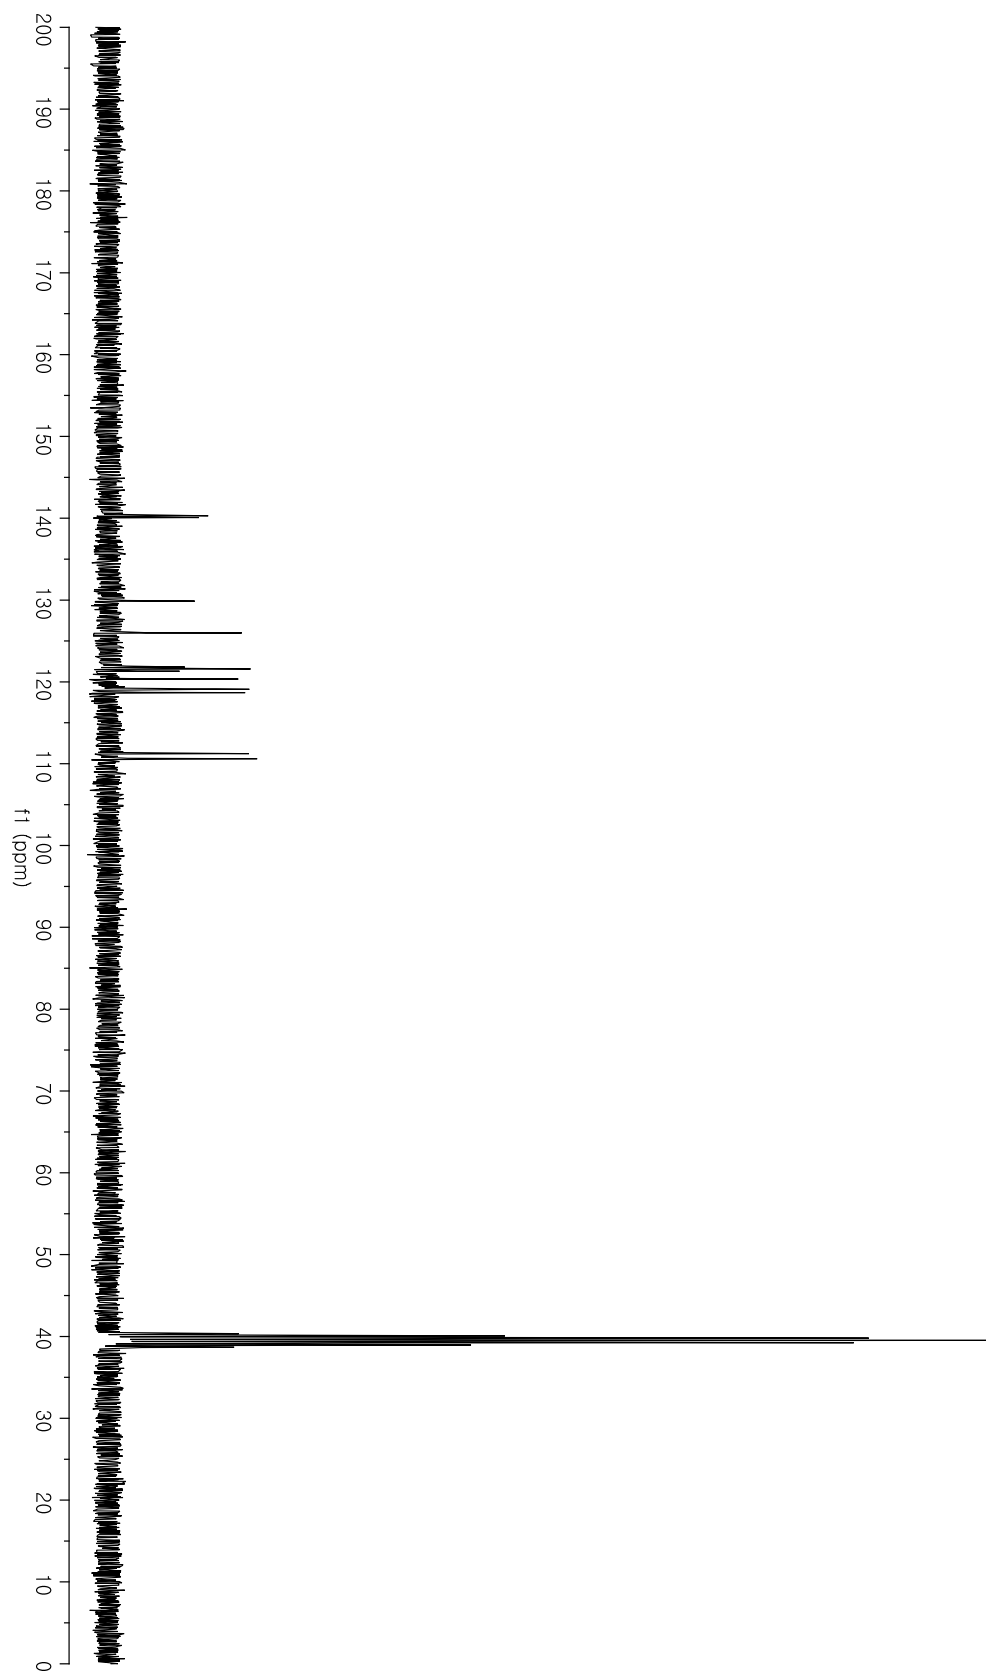



### 2-Fluoro-9H-carbazole (3j)

From reaction of 1-bromo-2-nitrobenzene **1b** with (4-fluorophenyl)boronic acid **2j**

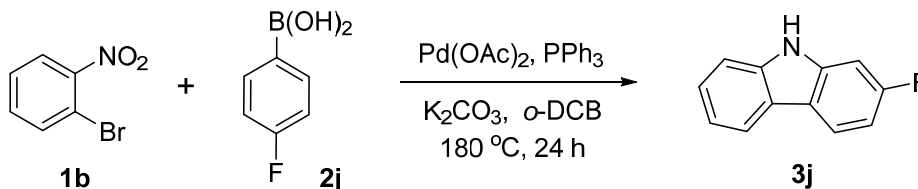

To a re-sealable pressure tube (13 x 100 mm) equipped with magnetic stir bar were added 1-bromo-2-nitrobenzene **1b** (100 mg, 0.5 mmol, 100 mol%), (4-fluorophenyl)boronic acid **2j** (94 mg, 0.65 mmol, 130 mol%), Pd(OAc)<sub>2</sub> (2.2 mg, 0.01 mmol, 2 mol%), PPh<sub>3</sub> (328 mg, 1.25 mmol, 250 mol %), K<sub>2</sub>CO<sub>3</sub> (138 mg, 1 mmol, 200 mol%) and *o*-DCB (1 mL, 0.5 M concentration with respect to 1-bromo-2-nitrobenzene **1b**). The mixture was heated at 180 °C (oil bath temperature) for 24 hr, at which point the reaction mixture was allowed to cool to ambient temperature. The reaction mixture was filtered through a pad of celite and the resulting liquor was concentrated *in vacuo* and purified by flash column chromatography (SiO<sub>2</sub>) using 5% acetone in hexanes as eluant to give **3j** as a white solid (75 mg, 81% yield). <sup>1</sup>H and <sup>13</sup>C NMR data were consistent with literature values.<sup>4</sup>

From reaction of 1-bromo-4-fluoro-2-nitrobenzene **1j** with phenylboronic acid **2a**

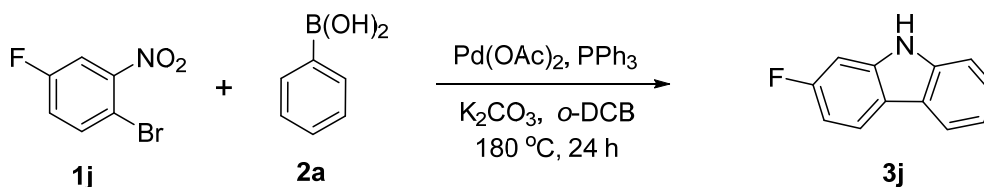

To a re-sealable pressure tube (13 x 100 mm) equipped with magnetic stir bar were added 1-bromo-4-fluoro-2-nitrobenzene **1j** (110 mg, 0.5 mmol, 100 mol%), phenylboronic acid **2a** (94 mg, 0.65 mmol, 130 mol%), Pd(OAc)<sub>2</sub> (2.2 mg, 0.01 mmol, 2 mol%), PPh<sub>3</sub> (328 mg, 1.25 mmol, 250 mol %), K<sub>2</sub>CO<sub>3</sub> (138 mg, 1 mmol, 200 mol%) and *o*-DCB (1 mL, 0.5 M concentration with respect to 1-bromo-4-fluoro-2-nitrobenzene **1j**). The mixture was heated at 180 °C (oil bath temperature) for 24 hr, at which point the reaction mixture was allowed to cool to ambient temperature. The reaction mixture was filtered through a pad of celite and the resulting liquor was concentrated *in vacuo* and purified by flash column chromatography (SiO<sub>2</sub>) using 5% acetone in hexanes as eluant to give **3j** as a white solid (70 mg, 76% yield).

(4) A. W. Freeman, M. Urvoy and M. E. Criswell, *J. Org. Chem.*, 2005, **70**, 5014-5019.

**TLC (SiO<sub>2</sub>)**:  $R_f = 0.43$  (acetone:hexanes, 1:5).

**<sup>1</sup>H NMR** (300 MHz, CDCl<sub>3</sub>)  $\delta$  8.07 (s, 1H), 8.03 – 7.97 (m, 2H), 7.44 – 7.39 (m, 2H), 7.26 – 7.21 (m, 1H), 7.11 (dd,  $J = 9.6, 2.2$  Hz, 1H), 7.02 – 6.93 (m, 1H).

**<sup>13</sup>C NMR** (75 MHz, DMSO)  $\delta$  161.18 (d,  $J = 238.6$  Hz), 140.41, 140.28, 125.25, 122.07, 121.46 (d,  $J = 10.6$  Hz), 119.97, 119.20, 119.00, 111.02, 106.49 (d,  $J = 24.1$  Hz), 97.34 (d,  $J = 26.1$  Hz).

**FTIR** (neat)  $\nu$  3411, 2919, 1362, 1263 cm<sup>-1</sup>.

**LRMS**  $m/z$  (EI): 186.2 ( $M^+ + 1$ ), 185.2, 184.3, 157.3, 92.8.

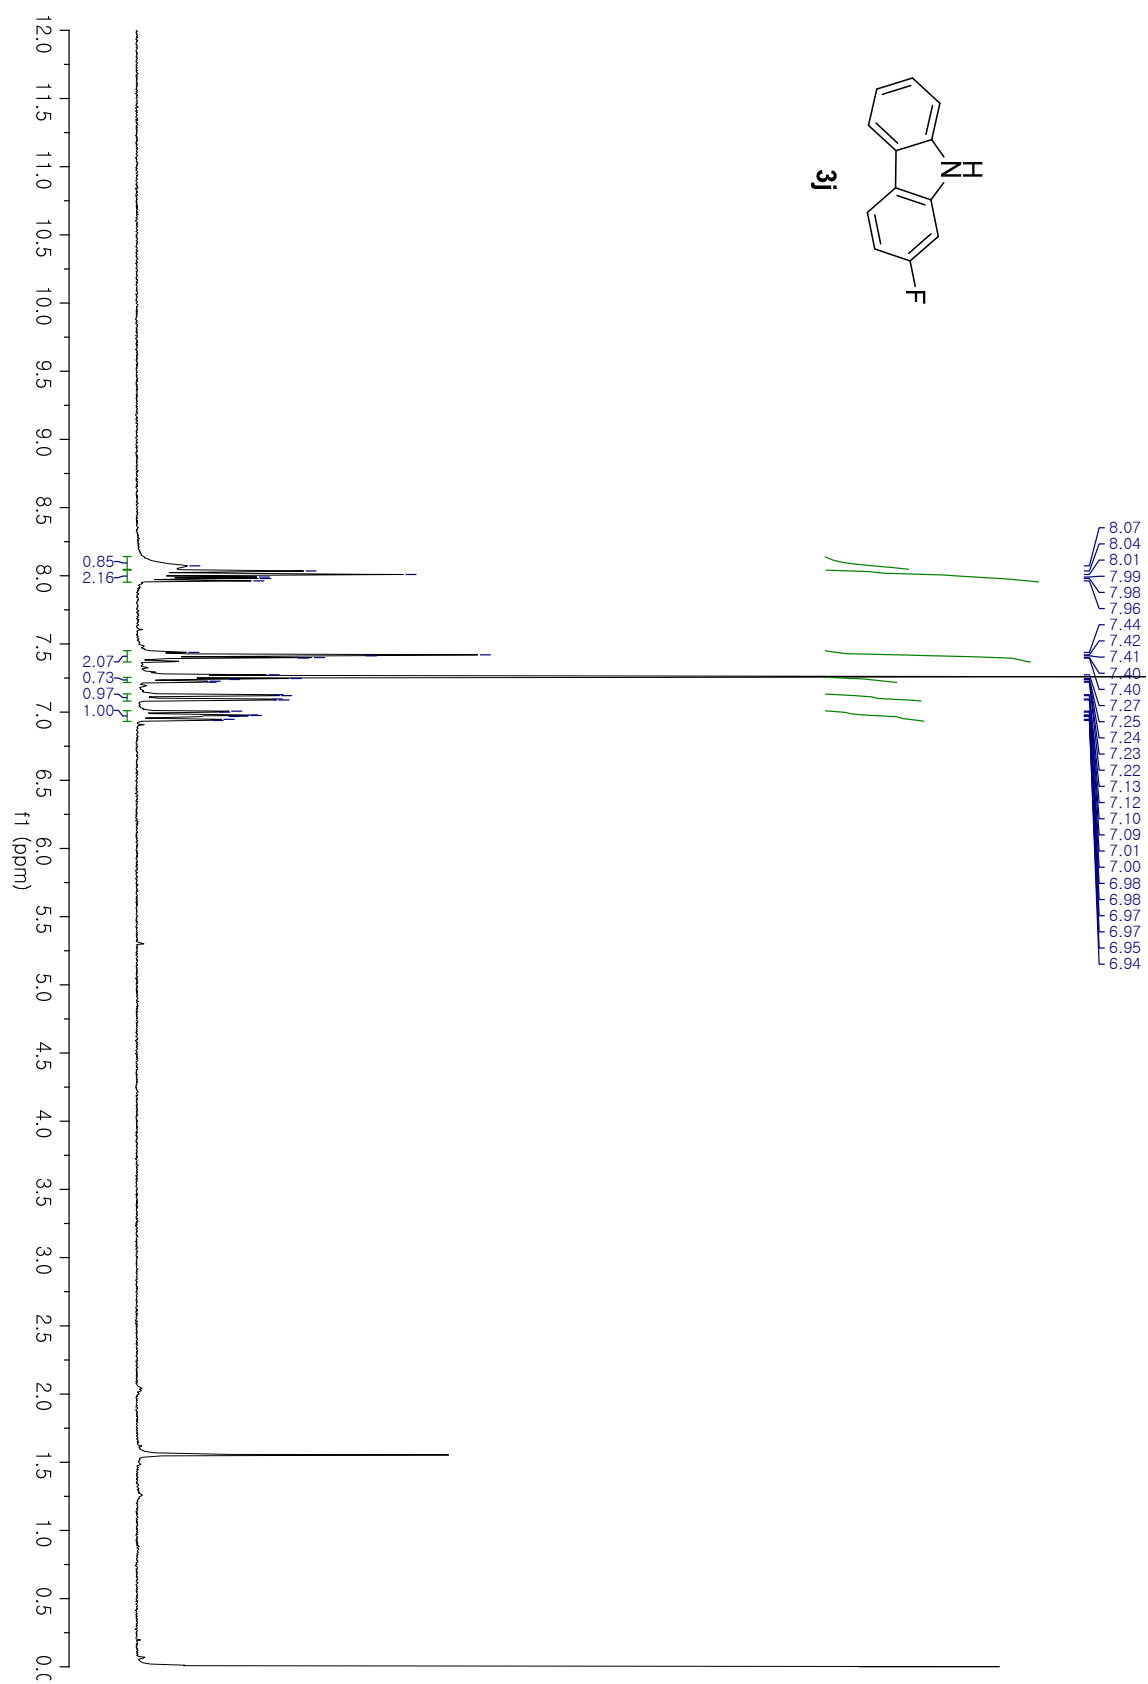

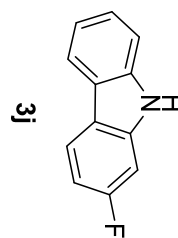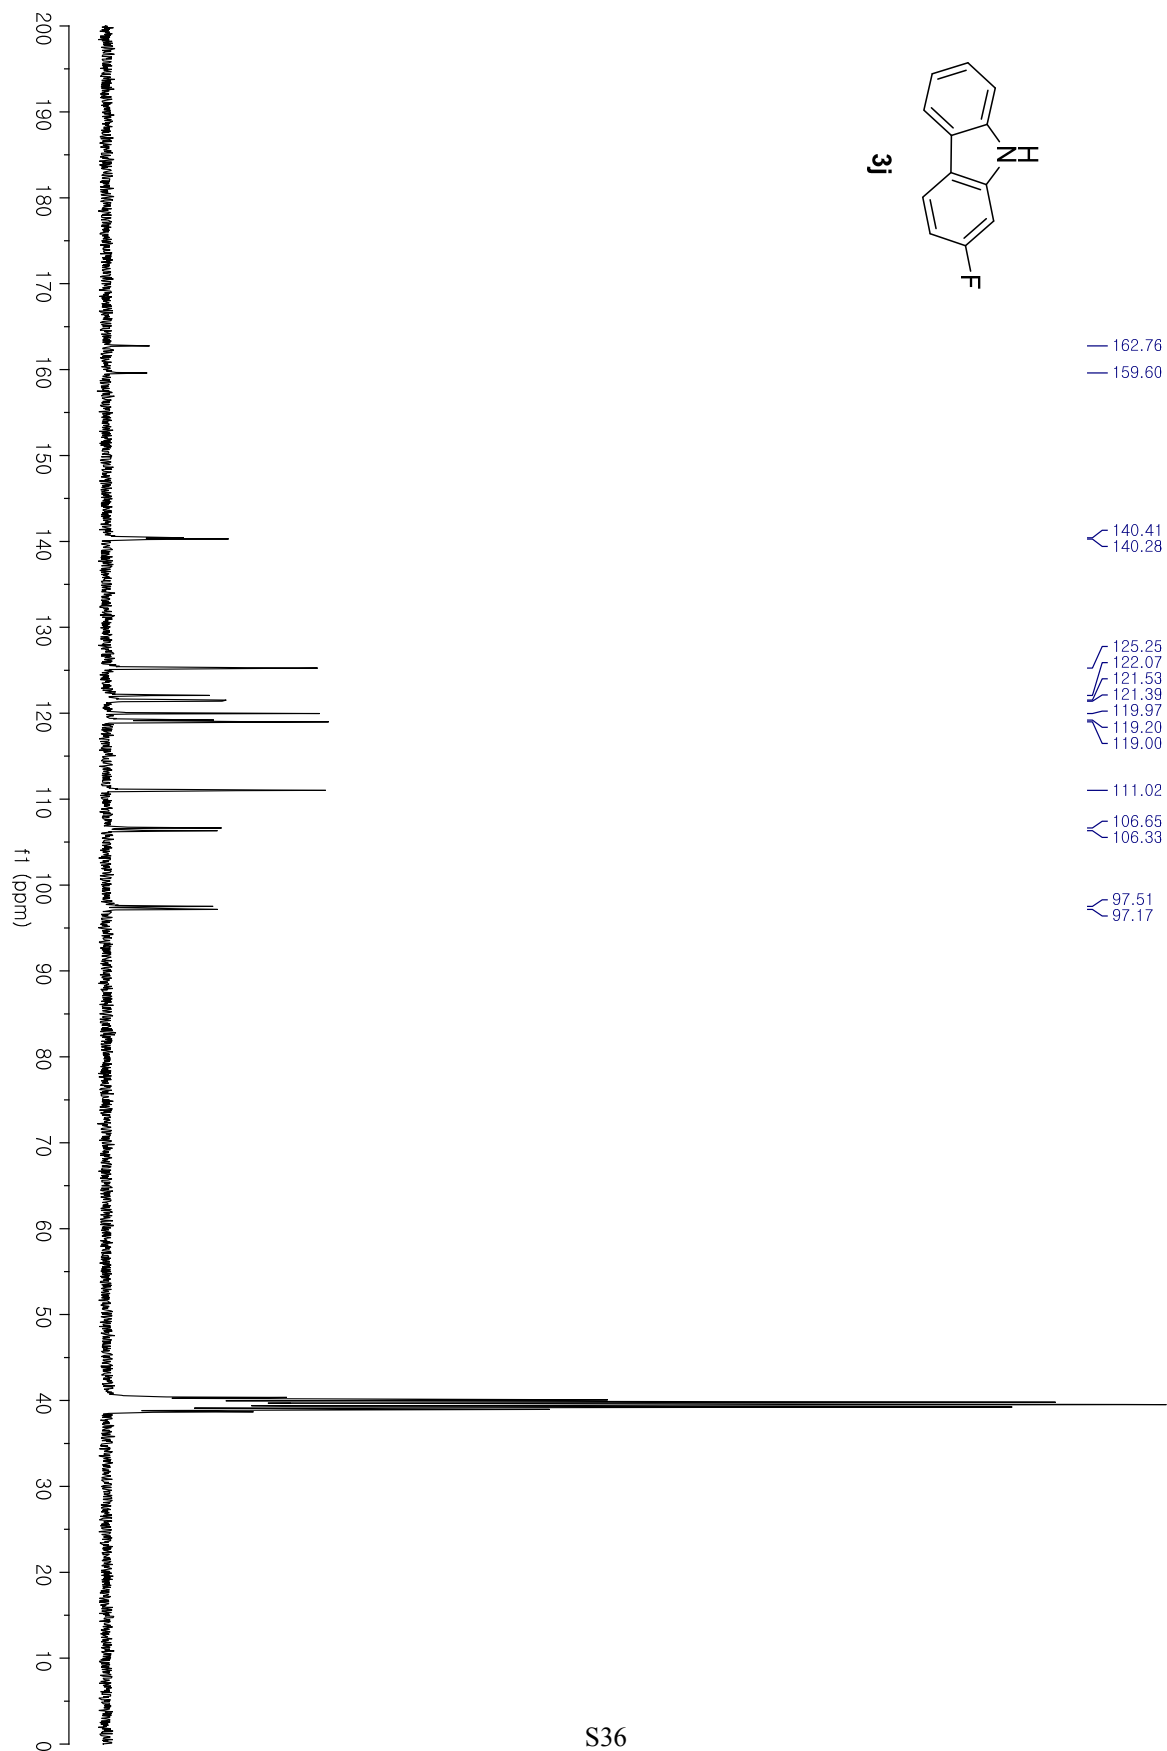

**1-(9H-Carbazole-2-yl)ethan-1-one (3k)**

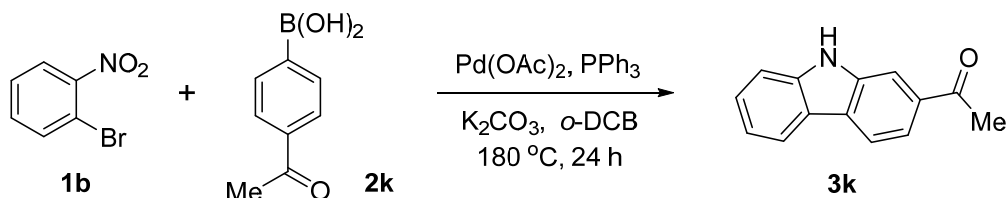

To a re-sealable pressure tube (13 x 100 mm) equipped with magnetic stir bar were added 1-bromo-2-nitrobenzene **1b** (100 mg, 0.5 mmol, 100 mol%), (4-acetylphenyl)boronic acid **2k** (107 mg, 0.65 mmol, 130 mol%),  $\text{Pd}(\text{OAc})_2$  (2.2 mg, 0.01 mmol, 2 mol%),  $\text{PPh}_3$  (328 mg, 1.25 mmol, 250 mol %),  $\text{K}_2\text{CO}_3$  (138 mg, 1 mmol, 200 mol%) and *o*-DCB (1 mL, 0.5 M concentration with respect to 1-bromo-2-nitrobenzene **1b**). The mixture was heated at  $180^\circ\text{C}$  (oil bath temperature) for 24 hr, at which point the reaction mixture was allowed to cool to ambient temperature. The reaction mixture was filtered through a pad of celite and the resulting liquor was concentrated *in vacuo* and purified by flash column chromatography ( $\text{SiO}_2$ ) using 7% acetone in hexanes as eluant to give **3k** as a white solid (41 mg, 43% yield).  $^1\text{H}$  and  $^{13}\text{C}$  NMR data were consistent with literature values.<sup>9</sup>

**TLC ( $\text{SiO}_2$ )**:  $R_f = 0.28$  (acetone:hexanes, 1:5).

**$^1\text{H}$  NMR** (300 MHz, DMSO)  $\delta$  11.56 (s, 1H), 8.22 (t,  $J = 8.3$  Hz, 2H), 8.08 (s, 1H), 7.79 (d,  $J = 8.2$  Hz, 1H), 7.56 (d,  $J = 8.1$  Hz, 1H), 7.47 (t,  $J = 7.5$  Hz, 1H), 7.21 (t,  $J = 7.4$  Hz, 1H), 2.68 (s, 3H).

**$^{13}\text{C}$  NMR** (75 MHz, DMSO)  $\delta$  197.86, 141.29, 139.15, 134.10, 127.03, 126.13, 121.59, 121.15, 120.06, 119.12, 118.66, 111.39, 111.35, 26.98.

**FTIR** (neat)  $\nu$  3332, 1738, 1366, 1216, 889, 779  $\text{cm}^{-1}$ .

**LRMS**  $m/z$  (EI) : 210.2 ( $\text{M}^+ + 1$ ), 209.3, 194.3, 166.3, 139.3.

(9) T. M. Gogsig, J. Kleimark, S. O. N. Lill, S. Korsager, A. T. Lindhardt, P.-O. Norrby and T. Skrydstrup, *J. Am. Chem. Soc.*, 2012, **134**, 443-452.

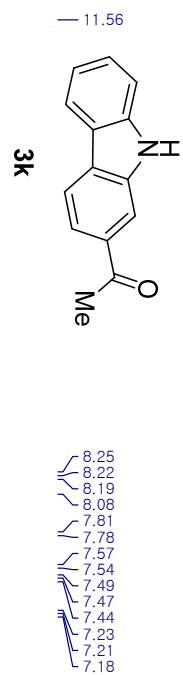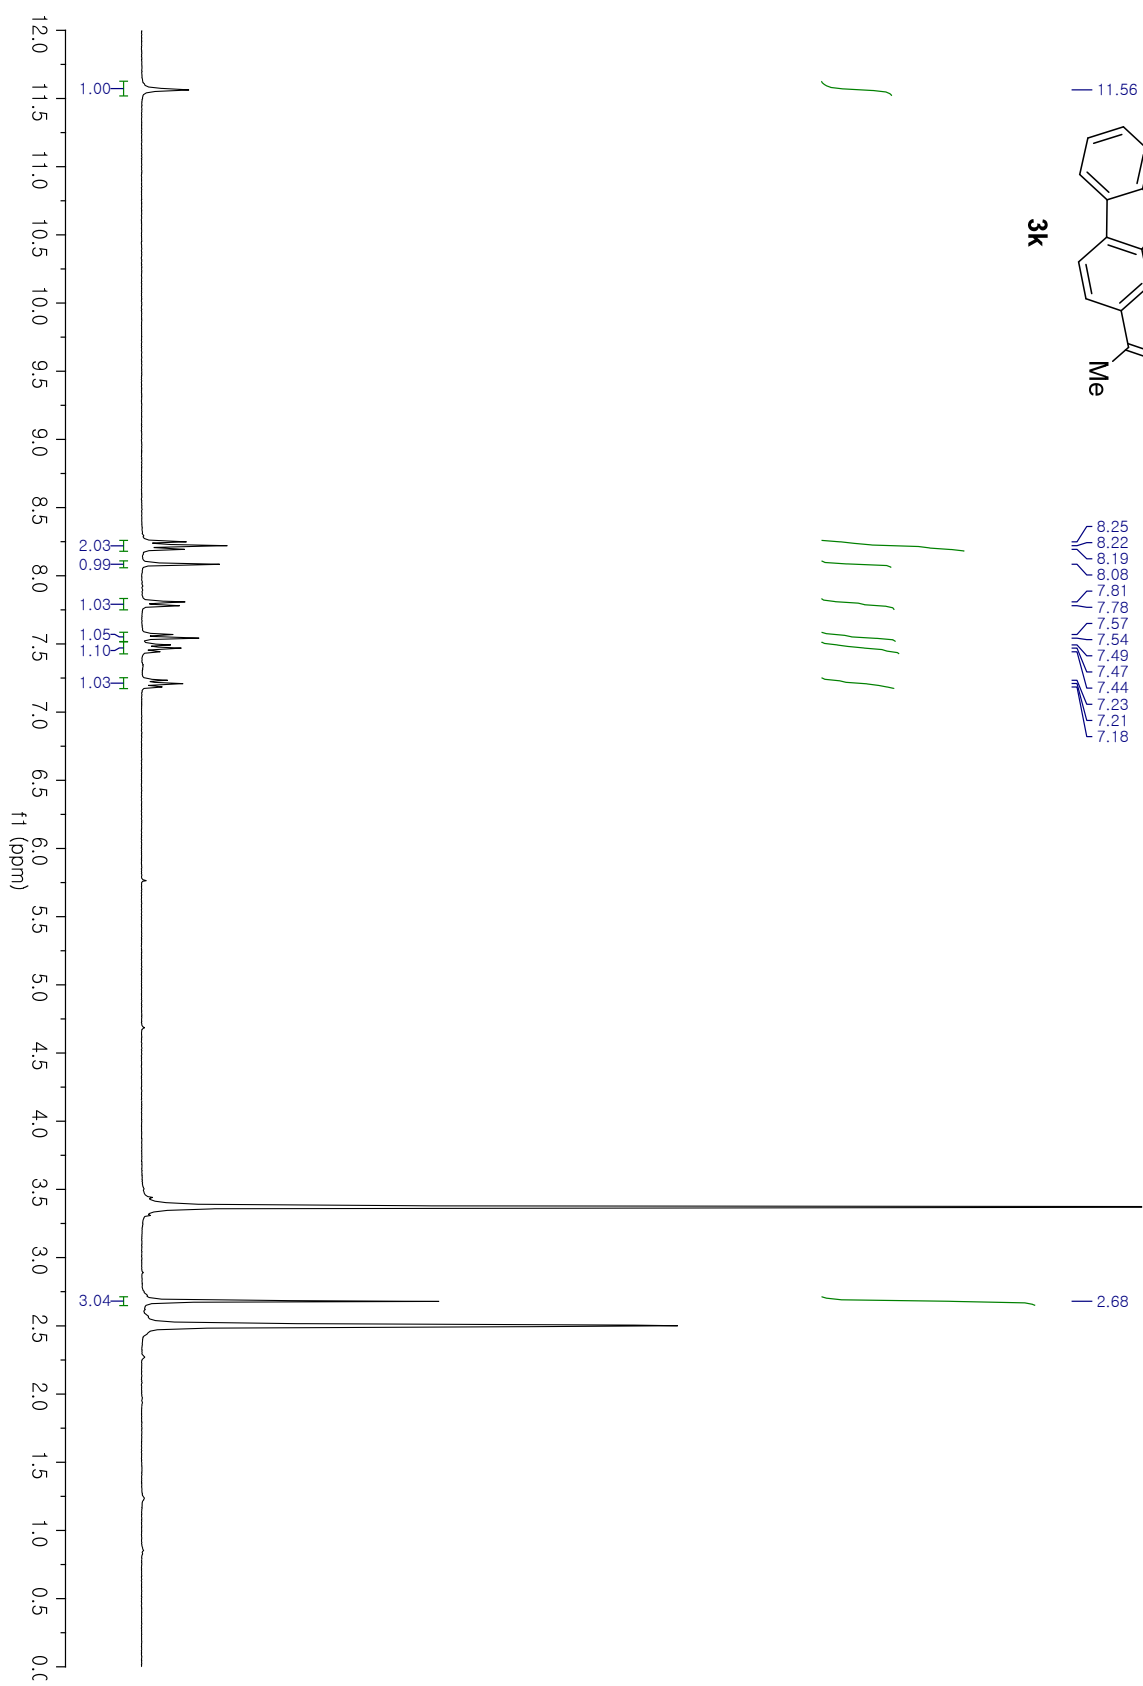

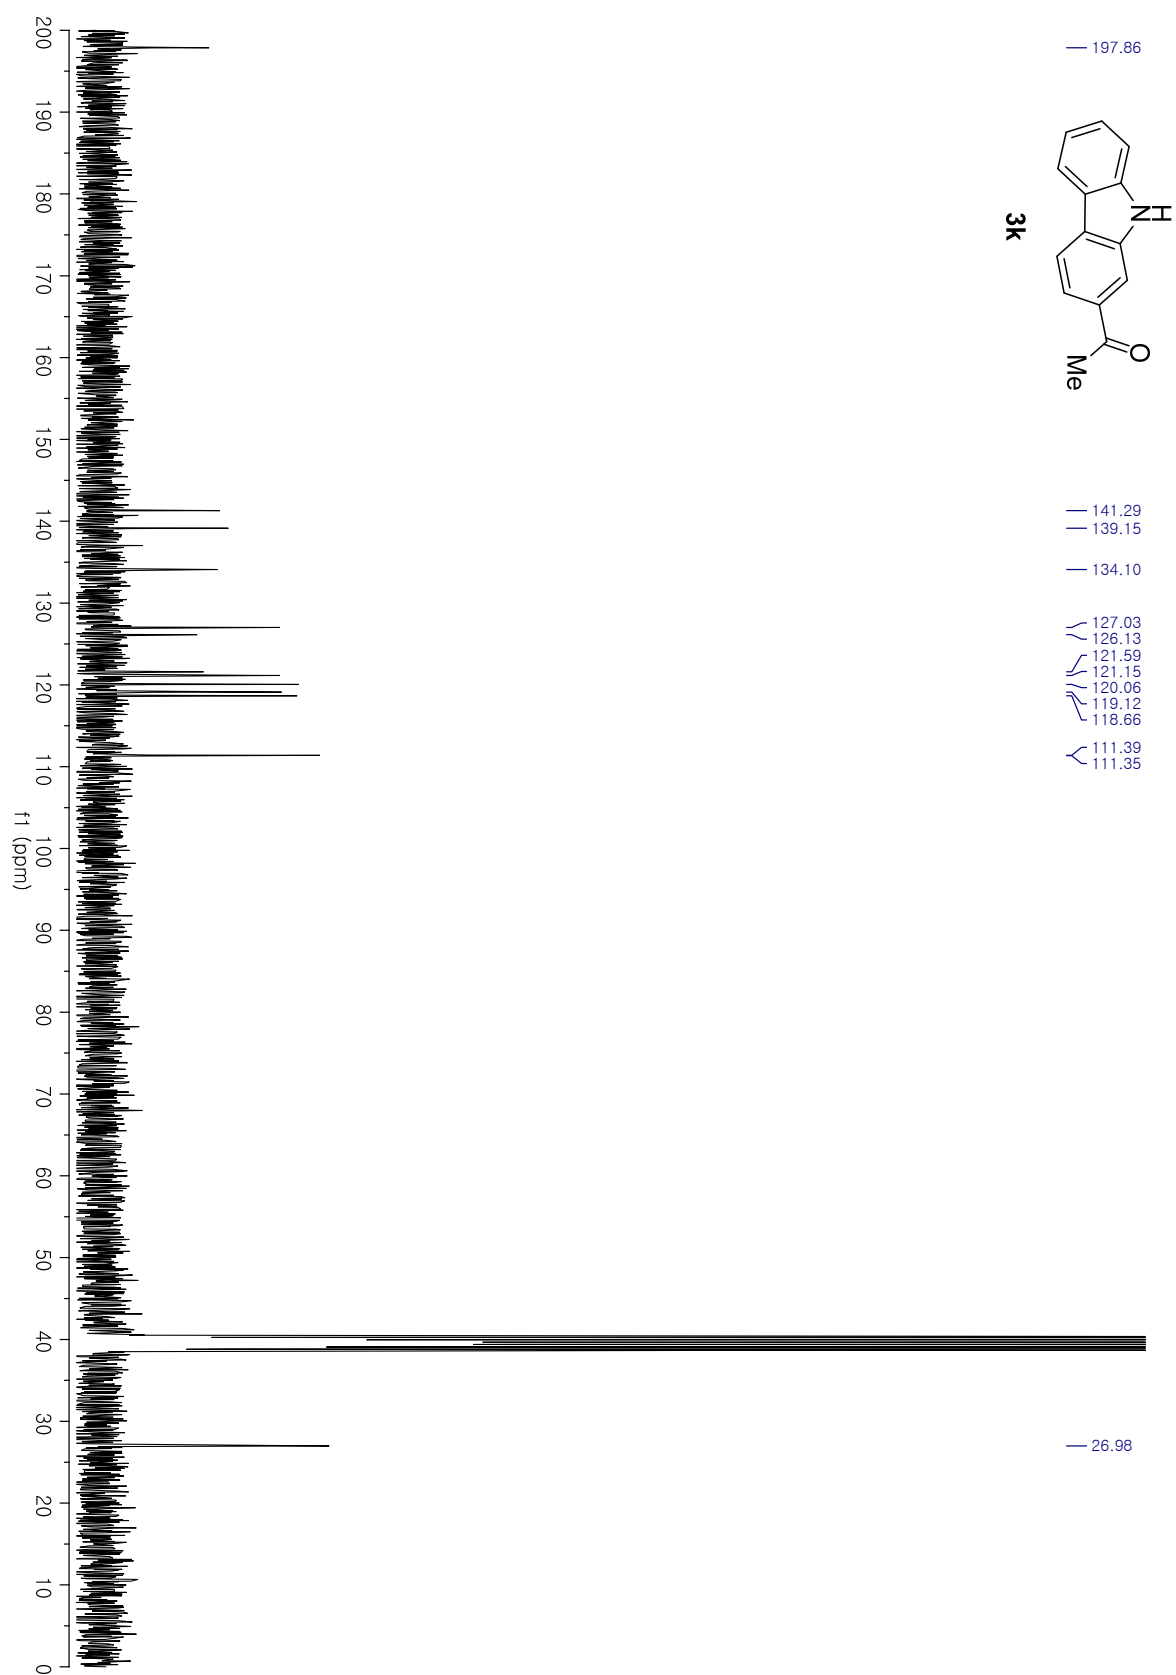

### Methyl-9H-carbazole-2-carboxylate (3I)

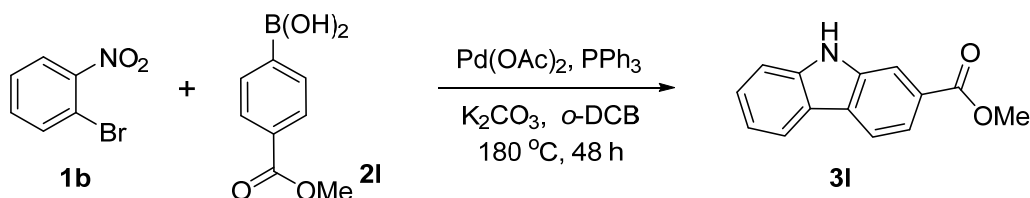

To a re-sealable pressure tube (13 x 100 mm) equipped with magnetic stir bar were added 1-bromo-2-nitrobenzene **1b** (100 mg, 0.5 mmol, 100 mol%), (4-(methoxycarbonyl)phenyl)boronic acid **2I** (94 mg, 0.65 mmol, 130 mol%), Pd(OAc) (5.6 mg, 0.025 mmol, 5 mol%), PPh<sub>3</sub> (328 mg, 1.25 mmol, 250 mol %), K<sub>2</sub>CO<sub>3</sub> (138 mg, 1 mmol, 200 mol%) and *o*-DCB (1 mL, 0.5 M concentration with respect to 1-bromo-2-nitrobenzene **1b**). The mixture was heated at 180 °C (oil bath temperature) for 48 hr, at which point the reaction mixture was allowed to cool to ambient temperature. The reaction mixture was filtered through a pad of celite and the resulting liquor was concentrated *in vacuo* and purified by flash column chromatography (SiO<sub>2</sub>) using 7% acetone in hexanes as eluant to give **3I** as a white solid (69 mg, 61% yield). <sup>1</sup>H and <sup>13</sup>C NMR data were consistent with literature values.<sup>1</sup>

**TLC (SiO<sub>2</sub>):** R<sub>f</sub> = 0.33 (acetone:hexanes, 1:5).

**<sup>1</sup>H NMR** (300 MHz, DMSO) δ 11.58 (s, 1H), 8.21 (t, *J* = 8.8 Hz, 2H), 8.12 (s, 1H), 7.78 (d, *J* = 8.2 Hz, 1H), 7.57 (d, *J* = 8.1 Hz, 1H), 7.47 (t, *J* = 7.5 Hz, 1H), 7.21 (t, *J* = 7.4 Hz, 1H), 3.89 (s, 3H).

**<sup>13</sup>C NMR** (75 MHz, DMSO) δ 166.95, 141.10, 139.05, 127.06, 126.30, 126.20, 121.60, 121.10, 120.14, 119.25, 119.16, 112.35, 111.42, 52.05.

**FTIR** (neat) : ν 3337, 2937, 1738, 1365, 1216, 888 cm<sup>-1</sup>.

**LRMS** *m/z* (EI): 226.2 (M<sup>+</sup>+1), 225.2, 194.2, 166.2, 139.2, 97.2, 83.2, 69.7.

(1) C. Suzuki, K. Hirano, T. Satoh and M. Miura, *Org. Lett.*, 2015, **17**, 1597-1600.



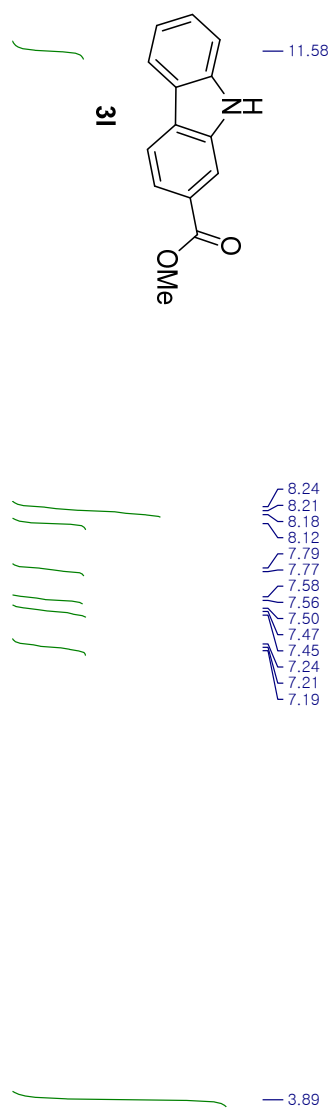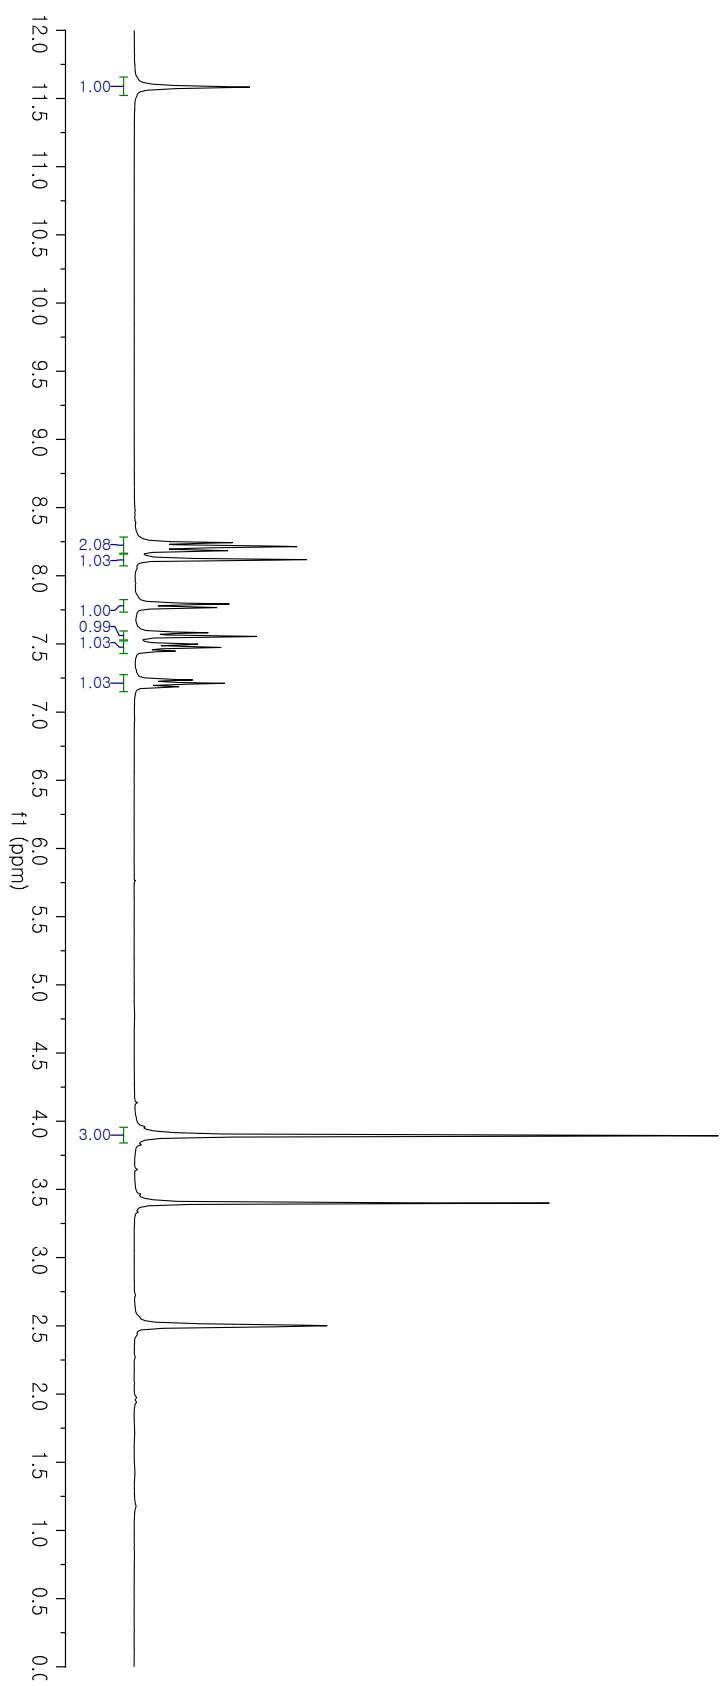

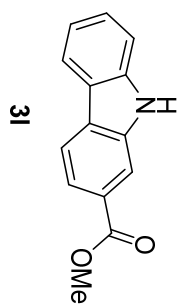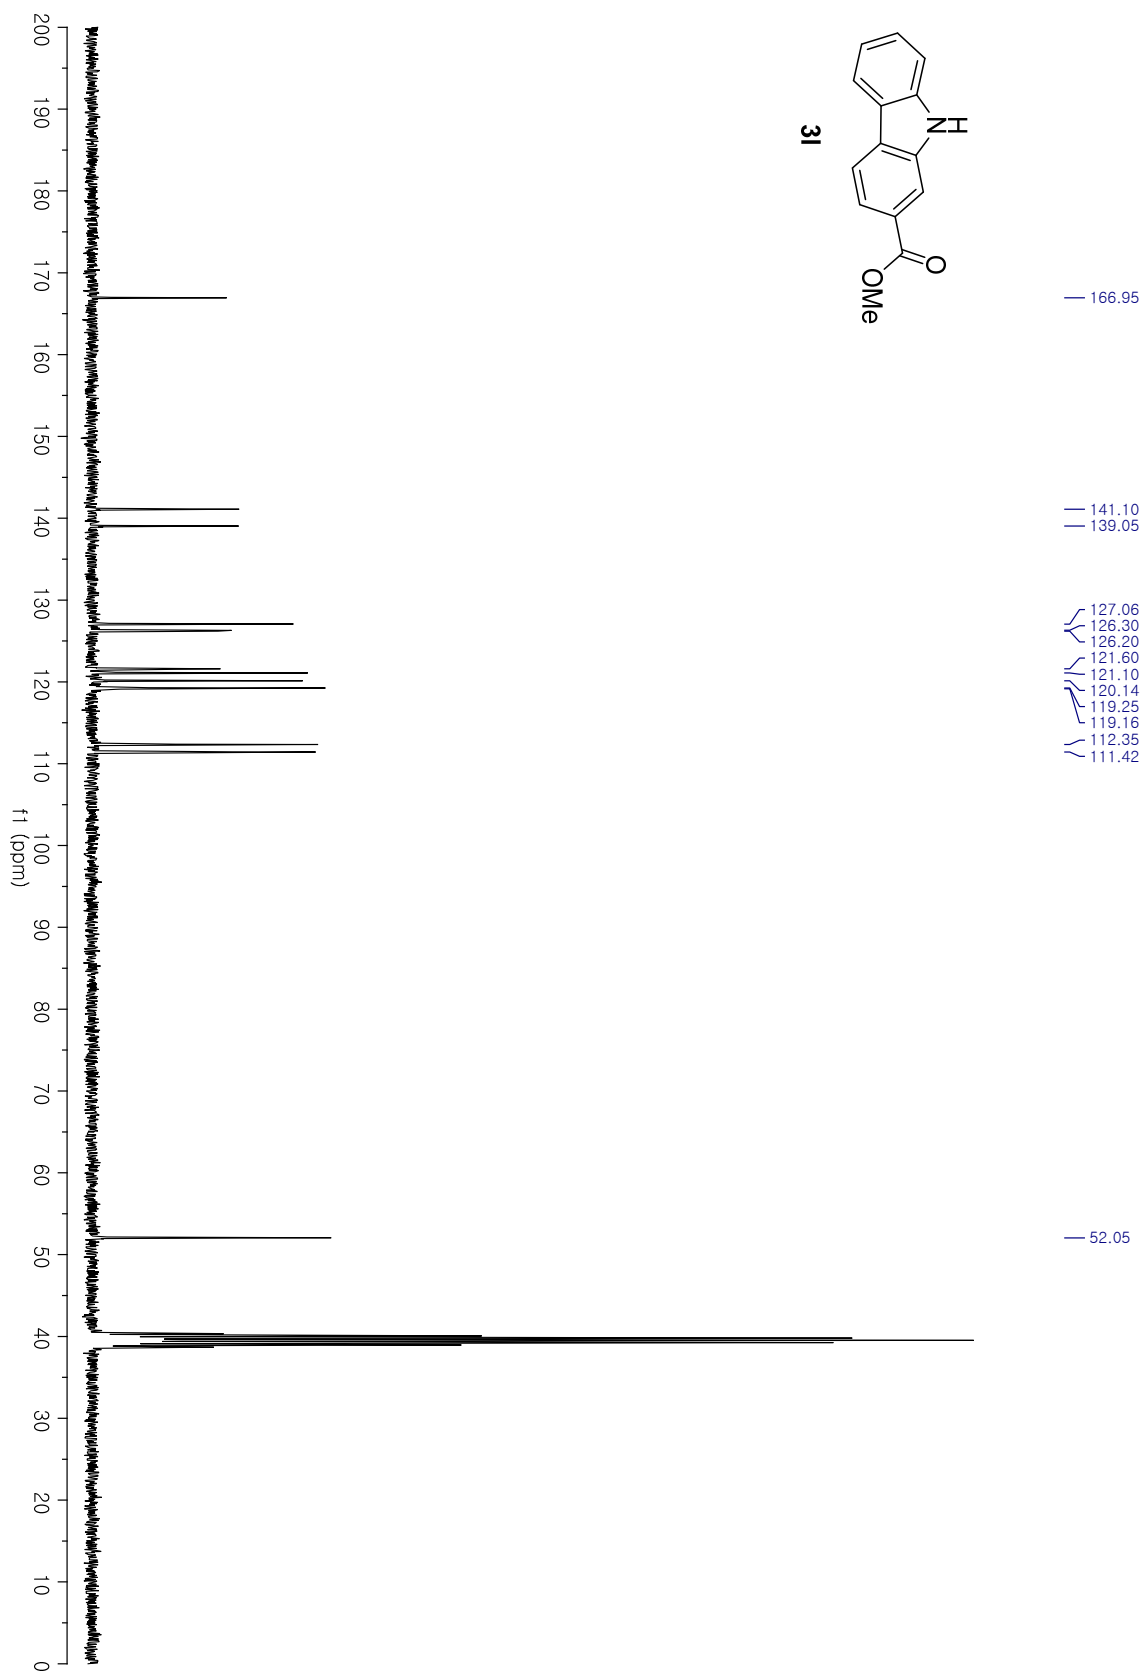

### 3-Methyl-9H-carbazole (3m) and 1-Methyl-9H-carbazole (3m')

From reaction of 1-bromo-2-nitrobenzene **1b** with *m*-tolylboronic acid **2m**

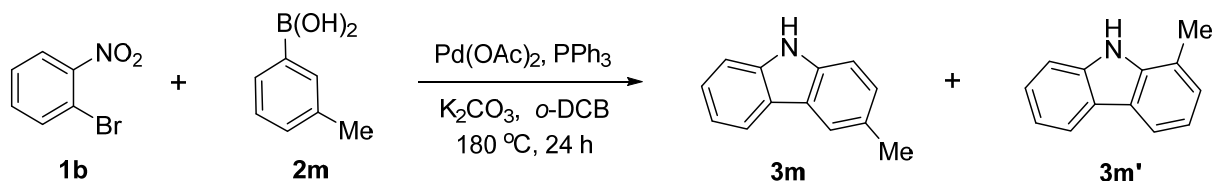

To a re-sealable pressure tube (13 x 100 mm) equipped with magnetic stir bar were added 1-bromo-2-nitrobenzene **1b** (100 mg, 0.5 mmol, 100 mol%), *m*-tolylboronic acid **2m** (90 mg, 0.65 mmol, 130 mol%), Pd(OAc)<sub>2</sub> (2.2 mg, 0.001 mmol, 5 mol%), PPh<sub>3</sub> (328 mg, 1.25 mmol, 250 mol %), K<sub>2</sub>CO<sub>3</sub> (138 mg, 1 mmol, 200 mol%) and *o*-DCB (1 mL, 0.5 M concentration with respect to 1-bromo-2-nitrobenzene **1b**). The mixture was heated at 180 °C (oil bath temperature) for 24 hr, at which point the reaction mixture was allowed to cool to ambient temperature. The reaction mixture was filtered through a pad of celite and the resulting liquor was concentrated *in vacuo* and purified by flash column chromatography (SiO<sub>2</sub>) using 5% acetone in hexanes as eluant to give inseparable mixture of **3m** and **3m'** as a white solid (80 mg, 88% yield, **3m**:**3m'**=1:1.2 (determined by <sup>1</sup>H NMR and GC-Mass spectrometer)). <sup>1</sup>H and <sup>13</sup>C NMR data were consistent with literature values.<sup>1,10</sup>

### 3-Methyl-9H-carbazole (3m)

**TLC (SiO<sub>2</sub>):** R<sub>f</sub> = 0.44 (Acetone:hexanes, 1:5).

**<sup>1</sup>H NMR** (300 MHz, DMSO) δ 11.10 (s, 1H), 8.05 (d, J = 7.7 Hz, 1H), 7.89 (s, 1H), 7.45 (d, J = 8.1 Hz, 1H), 7.39 – 7.32 (m, 2H), 7.20 (d, J = 8.0 Hz, 1H), 7.12 (t, J = 7.4 Hz, 1H), 2.46 (s, 3H).

**<sup>13</sup>C NMR** (75 MHz, DMSO) δ 139.98, 137.96, 127.08, 126.82, 125.29, 122.54, 122.22, 120.02, 119.90, 118.23, 110.85, 110.63, 21.10.

**FTIR** (neat) : ν 3442, 1701, 1371, 1207 cm<sup>-1</sup>.

**LRMS** *m/z* (EI): 182.2 (M<sup>+</sup>+1), 181.2, 180.3, 152.3, 90.2, 77.2, 63.2, 51.1.

(1) C. Suzuki, K. Hirano, T. Satoh and M. Miura, *Org. Lett.*, 2015, **17**, 1597-1600.

(10) S. Chakrabarty, I. Chatterjee, L. Tebben and A. Studer, *Angew. Chem. Int. Ed.*, 2013, **52**, 2968-2971.

**1-Methyl-9H-carbazole (3m')**

**TLC (SiO<sub>2</sub>)**: R<sub>f</sub> = 0.44 (Acetone:hexanes, 1:5).

**<sup>1</sup>H NMR** (300 MHz, DMSO) δ 11.16 (s, 1H), 8.08 (d, J = 7.8 Hz, 1H), 7.93 (d, J = 7.7 Hz, 1H), 7.50 (d, J = 8.1 Hz, 1H), 7.38 – 7.34 (m, 1H), 7.20 – 7.10 (m, 2H), 7.10 – 7.02 (m, 1H), 2.55 (s, 3H).

**<sup>13</sup>C NMR** (75 MHz, DMSO) δ 139.79, 139.04, 125.94, 125.29, 122.79, 121.95, 120.17, 120.05, 118.62, 118.46, 117.60, 111.03, 17.00.

**FTIR** (neat) : ν 3442, 1701, 1371, 1207 cm<sup>-1</sup>.

**LRMS** m/z (EI): 181.2 (M<sup>+</sup>), 180.2, 152.3, 135.2, 77.2, 63.2, 51.1

**GC**: (Varian 450-GC, SPB<sup>TM</sup>-680 (30 m x 0.25 mm x 0.25 μm), T<sub>0</sub> : 60 °C (hold 4 min), T<sub>1</sub> : Ramp, 250 °C at 10 °C/min, Carrier: He (1.0 mL/min), Total time 60 min), t<sub>3m</sub>' = 21.95 min, t<sub>3m</sub> = 22.32 min, Ratio (**3m:3m'** = 1:1.2).

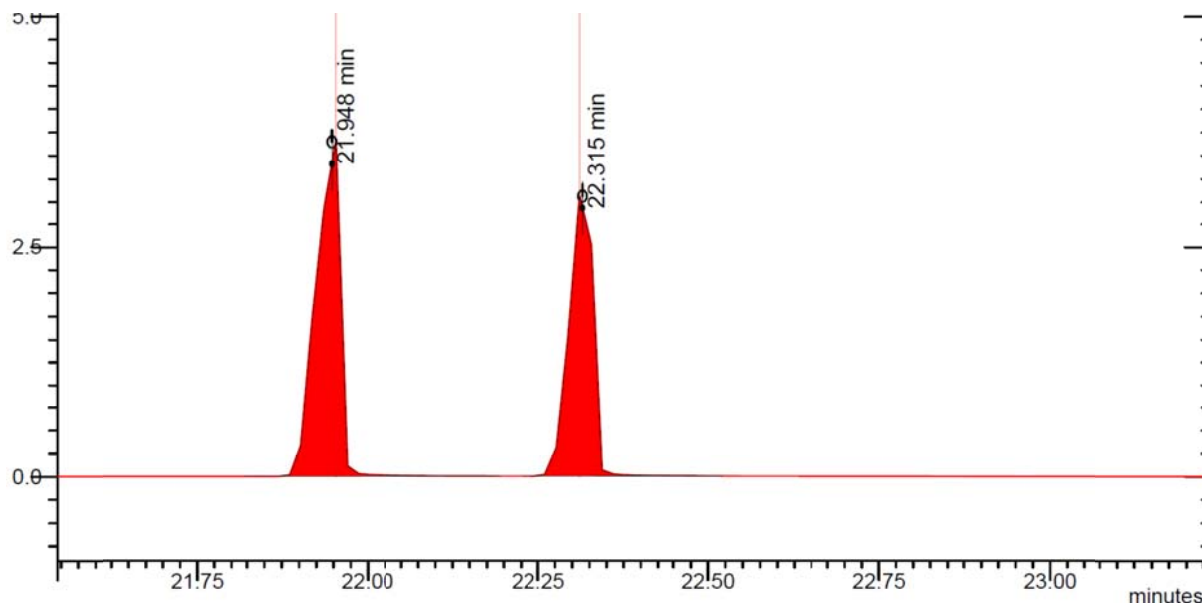

|    | <u>Retention Time</u> | <u>Area</u> | <u>% of Total</u> | <u>Signal/Noise</u> | <u>Scan Description</u> |
|----|-----------------------|-------------|-------------------|---------------------|-------------------------|
| 1. | 21.948                | 8.937e+6    | 54.332            | 25502               | Merged                  |
| 2. | 22.315                | 7.512e+6    | 45.668            | 17526               | Merged                  |

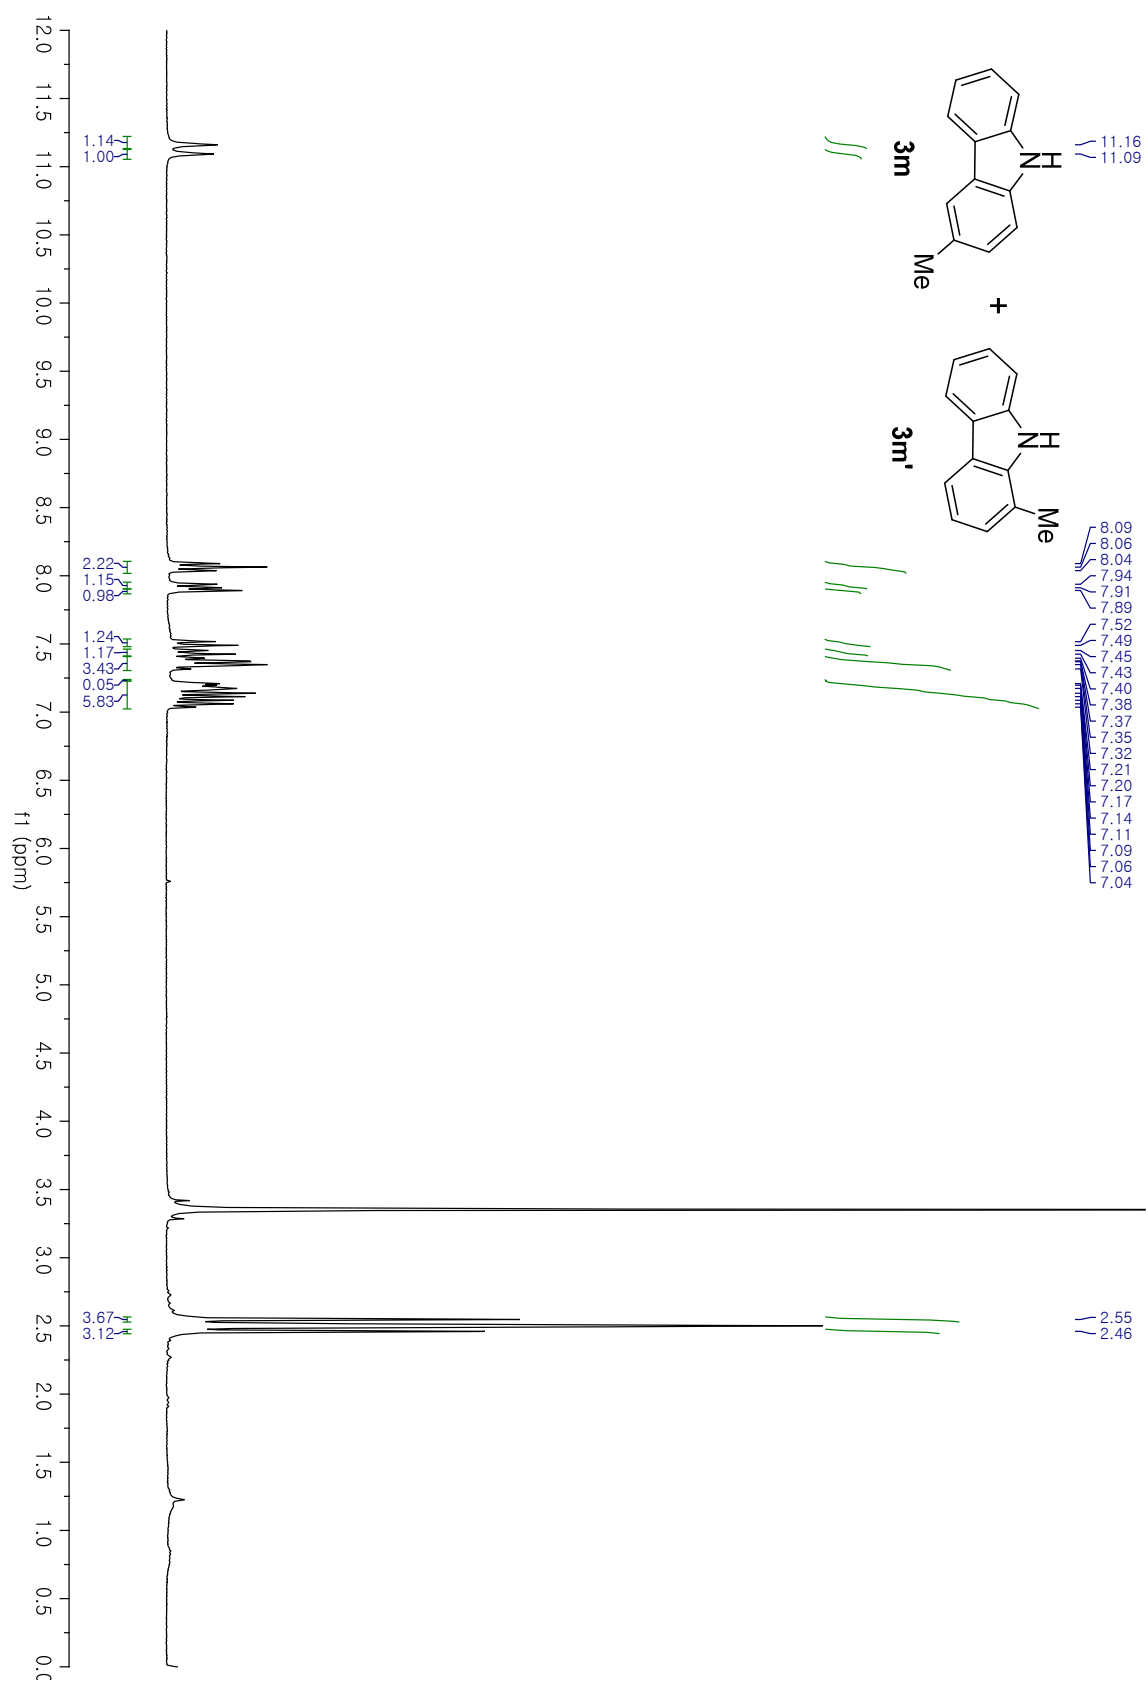

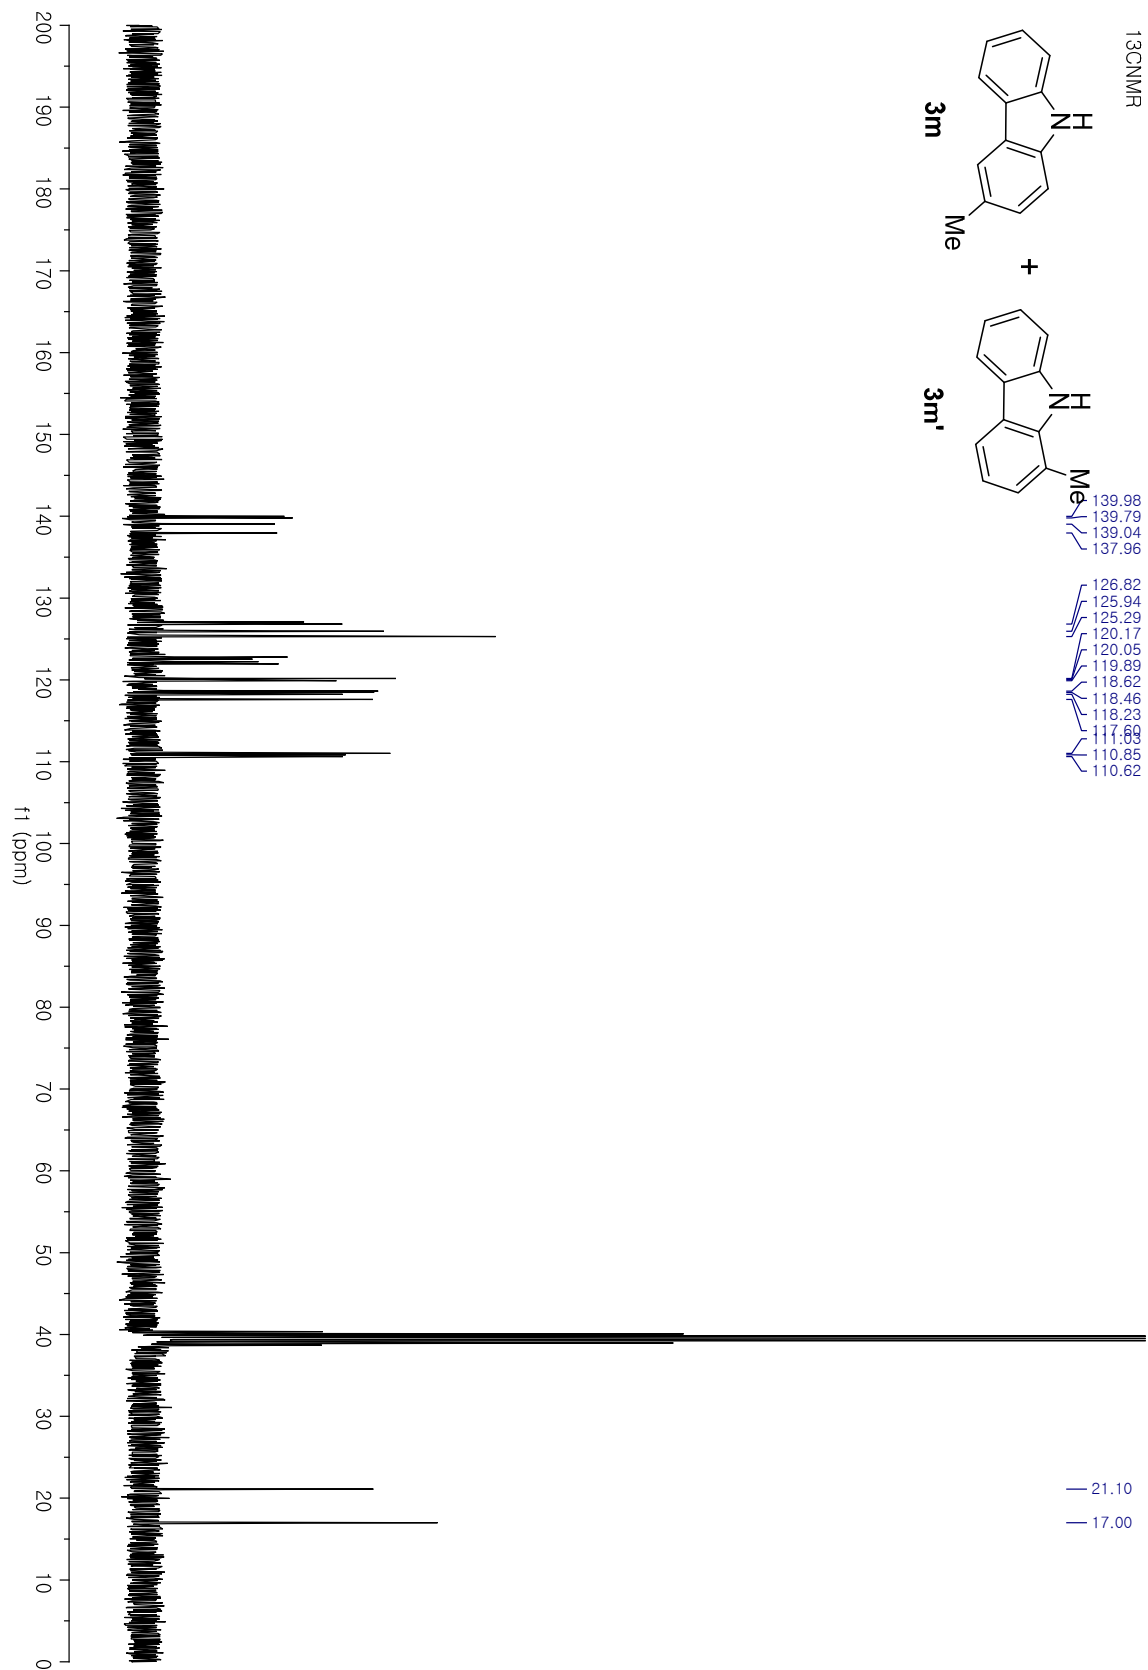

### **3-Methyl-9H-carbazole (3m)**

From reaction of 2-bromo-4-methyl-1-nitrobenzene **1m** with phenylboronic acid **2a**

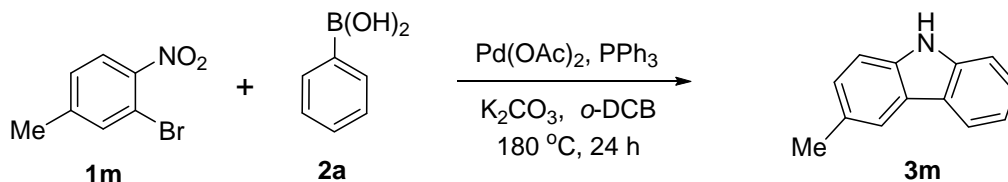

To a re-sealable pressure tube (13 x 100 mm) equipped with magnetic stir bar were added 2-bromo-4-methyl-1-nitrobenzene **1m** (100 mg, 0.5 mmol, 100 mol%), phenylboronic acid **2a** (94 mg, 0.65 mmol, 130 mol%), Pd(OAc)<sub>2</sub> (2.2 mg, 0.01 mmol, 2 mol%), PPh<sub>3</sub> (328 mg, 1.25 mmol, 250 mol %), K<sub>2</sub>CO<sub>3</sub> (138 mg, 1 mmol, 200 mol%) and *o*-DCB (1 mL, 0.5 M concentration with respect to 2-bromo-4-methyl-1-nitrobenzene **1m**). The mixture was heated at 180 °C (oil bath temperature) for 24 hr, at which point the reaction mixture was allowed to cool to ambient temperature. The reaction mixture was filtered through a pad of celite and the resulting liquor was concentrated *in vacuo* and purified by flash column chromatography (SiO<sub>2</sub>) using 5% acetone in hexanes as eluant to give **3m** as a brown solid (70 mg, 77% yield). <sup>1</sup>H and <sup>13</sup>C NMR data were consistent with literature values.<sup>1</sup>

**TLC (SiO<sub>2</sub>)**: R<sub>f</sub> = 0.44 (Acetone:hexanes, 1:5).

**<sup>1</sup>H NMR** (300 MHz, DMSO) δ 11.10 (s, 1H), 8.05 (d, J = 7.7 Hz, 1H), 7.89 (s, 1H), 7.45 (d, J = 8.1 Hz, 1H), 7.39 – 7.32 (m, 2H), 7.20 (d, J = 8.0 Hz, 1H), 7.12 (t, J = 7.4 Hz, 1H), 2.46 (s, 3H).

**<sup>13</sup>C NMR** (75 MHz, DMSO) δ 139.98, 137.96, 127.08, 126.82, 125.29, 122.54, 122.22, 120.02, 119.90, 118.23, 110.85, 110.63, 21.10.

**FTIR** (neat) : ν 3442, 1701, 1371, 1207 cm<sup>-1</sup>.

**LRMS** *m/z* (EI): 182.2 (M<sup>+</sup>+1), 181.2, 180.3, 152.3, 90.2, 77.2, 63.2, 51.1.

---

(1) C. Suzuki, K. Hirano, T. Satoh and M. Miura, *Org. Lett.*, 2015, **17**, 1597-1600.

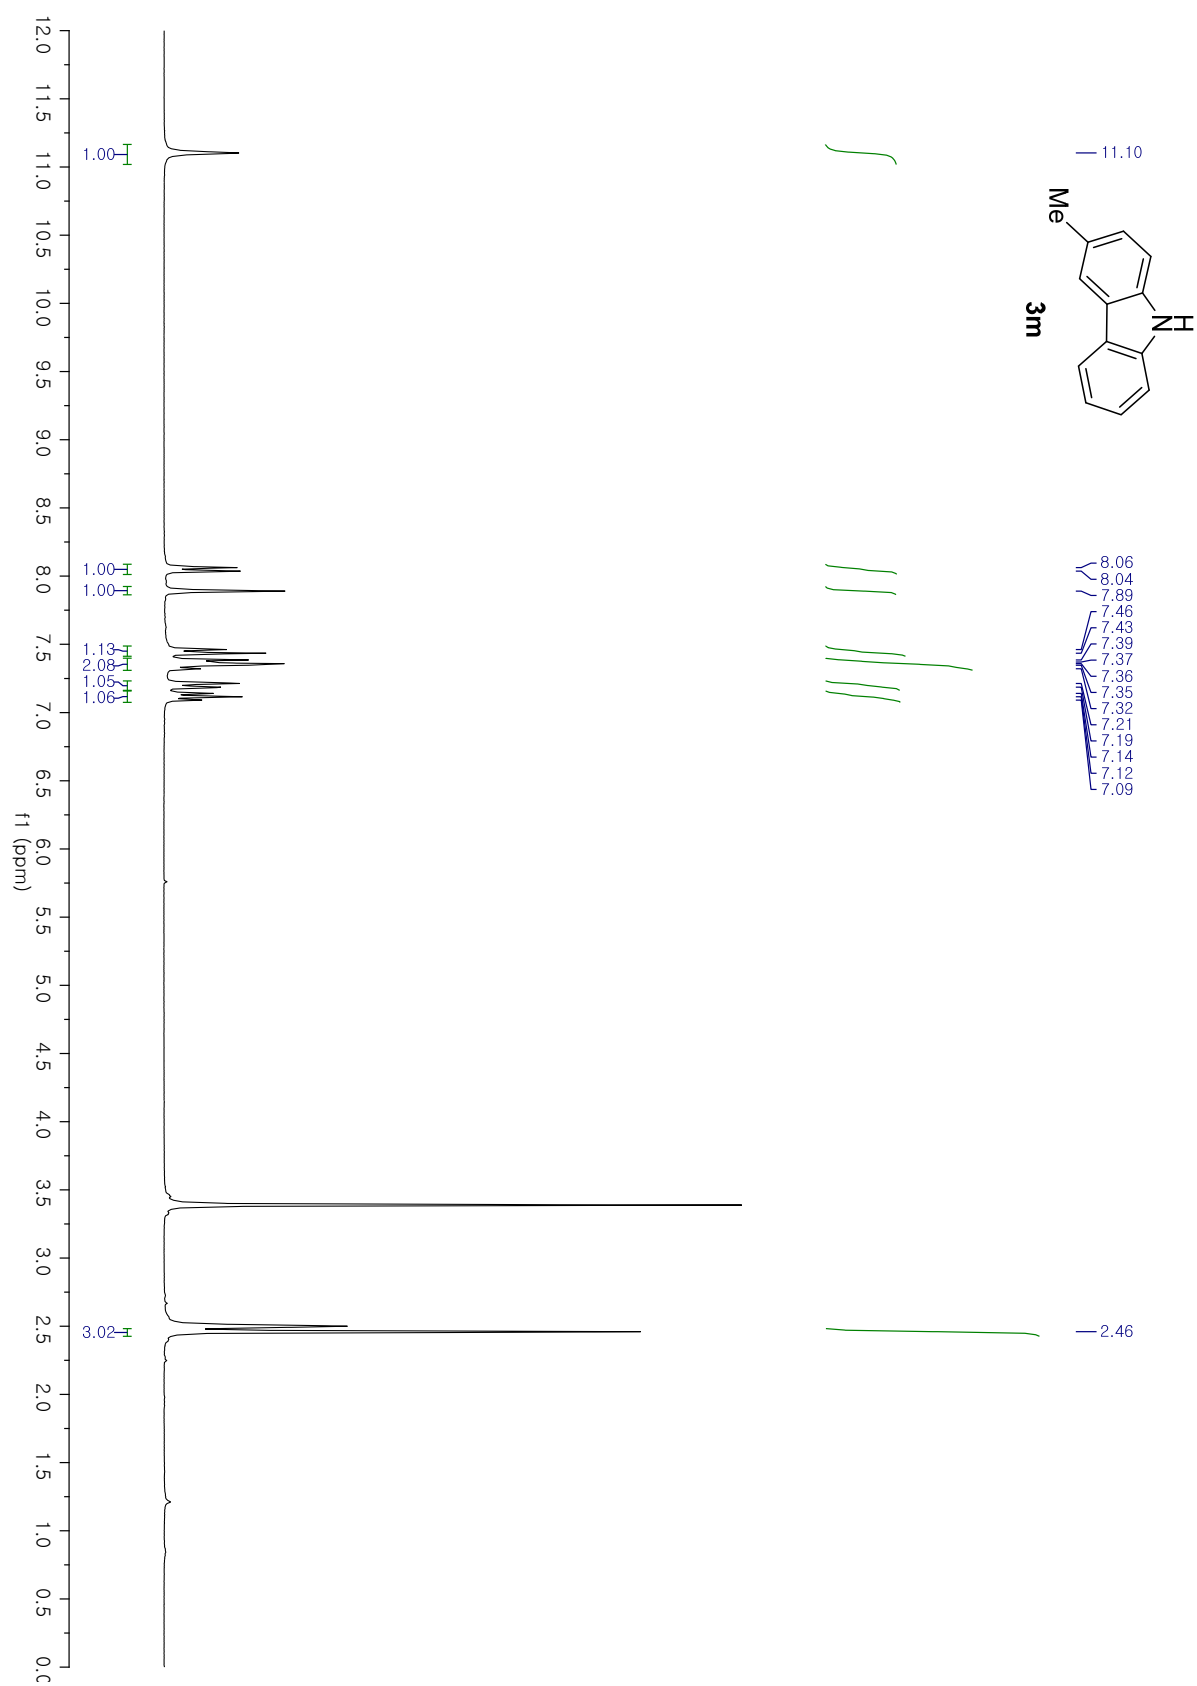



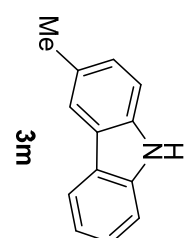

— 139.98  
 — 137.96

↘ 127.08  
 ↘ 126.82  
 ↘ 125.29  
 ↘ 122.54  
 ↘ 122.22  
 ↘ 120.02  
 ↘ 119.90  
 ↘ 118.23

↘ 110.85  
 ↘ 110.63

— 21.10

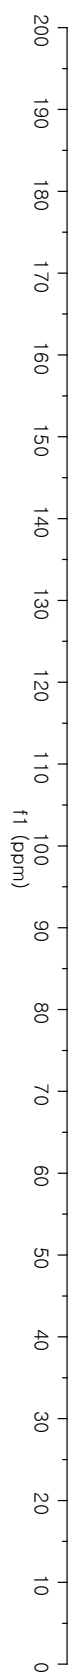

### 5H-[1,3]dioxolo[4,5-*b*]carbazole (3n) and 5H-[1,3]dioxolo[4,5-*a*]carbazole (3n')

From reaction of 1-bromo-2-nitrobenzene **1b** with benzo[d][1,3]dioxol-5-ylboronic acid **2n**

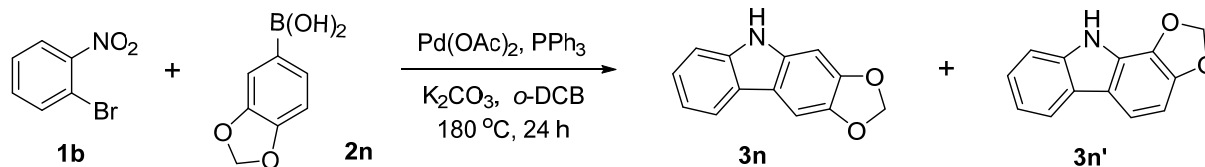

To a re-sealable pressure tube (13 x 100 mm) equipped with magnetic stir bar were added 1-bromo-2-nitrobenzene **1b** (100 mg, 0.5 mmol, 100 mol%), benzo[d][1,3]dioxol-5-ylboronic acid **2n** (108 mg, 0.65 mmol, 130 mol%), Pd(OAc)<sub>2</sub> (2.2 mg, 0.001 mmol, 5 mol%), PPh<sub>3</sub> (328 mg, 1.25 mmol, 250 mol %), K<sub>2</sub>CO<sub>3</sub> (138 mg, 1 mmol, 200 mol%) and *o*-DCB (1 mL, 0.5 M concentration with respect to 1-bromo-2-nitrobenzene **1b**). The mixture was heated at 180 °C (oil bath temperature) for 24 hr, at which point the reaction mixture was allowed to cool to ambient temperature. The reaction mixture was filtered through a pad of celite and the resulting liquor was concentrated *in vacuo* and purified by flash column chromatography (SiO<sub>2</sub>) using 5% acetone in hexanes as eluant to give mixture of **3n** and **3n'** as a white solid (90 mg, 87% yield, **3n**:**3n'**=5.9:1 (determined by <sup>1</sup>H NMR and GC-Mass spectrometer)). <sup>1</sup>H and <sup>13</sup>C NMR data were consistent with literature values.<sup>11</sup>

### 5H-[1,3]dioxolo[4,5-*b*]carbazole (3n)

**TLC (SiO<sub>2</sub>):** R<sub>f</sub> = 0.42 (Acetone:hexanes, 1:5).

**<sup>1</sup>H NMR** (300 MHz, DMSO) δ 11.08 (s, 1H), 7.96 (d, *J* = 7.7 Hz, 1H), 7.62 (s, 1H), 7.40 (d, *J* = 8.0 Hz, 1H), 7.24 (t, *J* = 7.5 Hz, 1H), 7.09 – 7.02 (m, 2H), 6.03 (s, 2H).

**<sup>13</sup>C NMR** (75 MHz, DMSO) δ 146.72, 141.52, 139.56, 135.14, 123.76, 122.83, 119.26, 118.20, 115.40, 110.79, 100.69, 99.36, 92.16.

**FTIR** (neat) ν 3397, 1710, 1266, 1043, 936, 748 cm<sup>-1</sup>.

**LRMS** *m/z* (EI): 212.0 (M<sup>+</sup>+1), 211.2.

(11) S. Chakraborty, G. Chattopadhyay and C. Saha, *J. Heterocycl. Chem.*, 2013, **50**, 91-98.

**5H-[1,3]dioxolo[4,5-a]carbazole (3n')**

**TLC (SiO<sub>2</sub>)**: R<sub>f</sub> = 0.42 (Acetone:hexanes, 1:5).

**<sup>1</sup>H NMR** (300 MHz, DMSO) δ 11.35 (s, 1H), 8.01 (d, J = 7.7 Hz, 1H), 7.67 (d, J = 15.0 Hz, 1H), 7.42 (d, J = 8.3 Hz, 1H), 7.38 – 7.30 (m, 1H), 7.16 – 7.06 (m, 1H), 6.86 (d, J = 8.2 Hz, 1H), 6.13 (s, 2H).

**FTIR** (neat) ν 3397, 1710, 1266, 1043, 936, 748 cm<sup>-1</sup>.

**LRMS** m/z (EI): 211.9 (M<sup>+</sup>+1), 211.1, 154.2.

**GC**: (Varian 450-GC, SPB<sup>TM</sup>-680 (30 m x 0.25 mm x 0.25 μm), T<sub>0</sub> : 60 °C (hold 4 min), T<sub>1</sub> : Ramp, 250 °C at 10 °C/min, Carrier: He (1.0 mL/min), Total time 60 min), t<sub>3n'</sub> = 25.38 min, t<sub>3n</sub> = 26.90 min, Ratio (**3n:3n'** = 5.9:1).

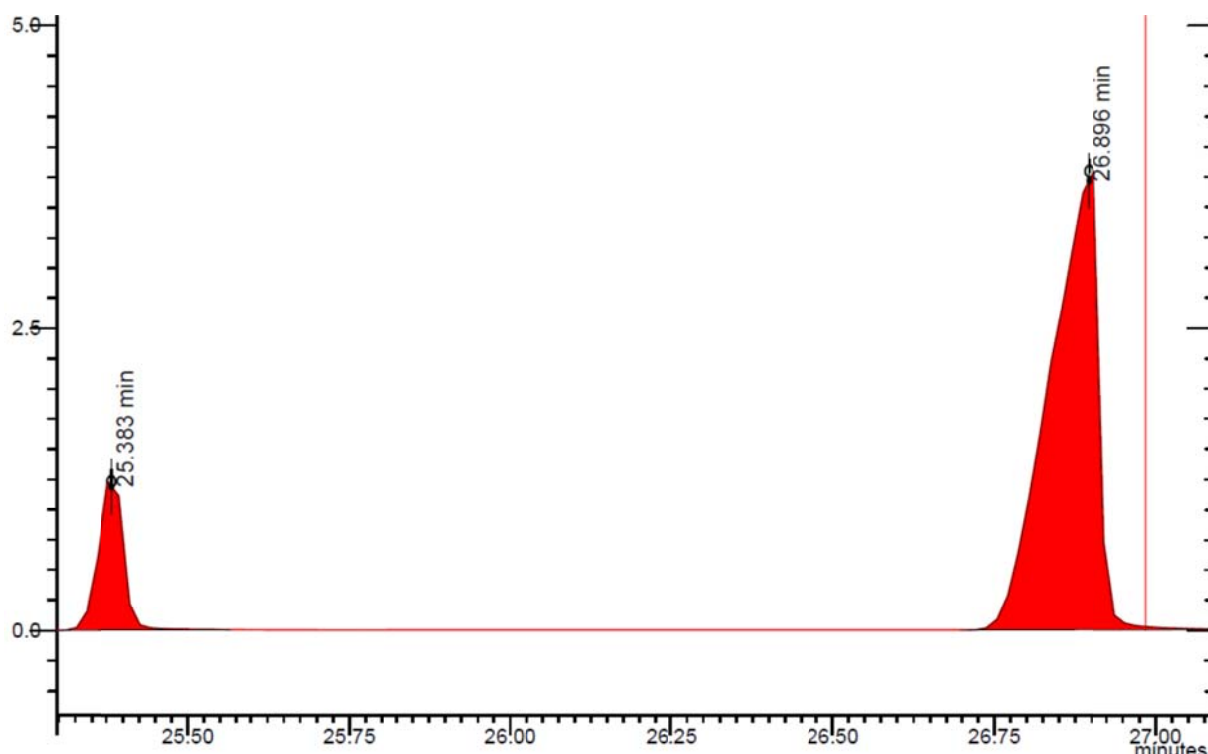

|    | <u>Retention Time</u> | <u>Area</u> | <u>% of Total</u> | <u>Signal/Noise</u> | <u>Scan Description</u> |
|----|-----------------------|-------------|-------------------|---------------------|-------------------------|
| 1. | 25.383                | 3.432e+6    | 14.564            | 11908               | Merged                  |
| 2. | 26.896                | 2.013e+7    | 85.436            | 32671               | Merged                  |

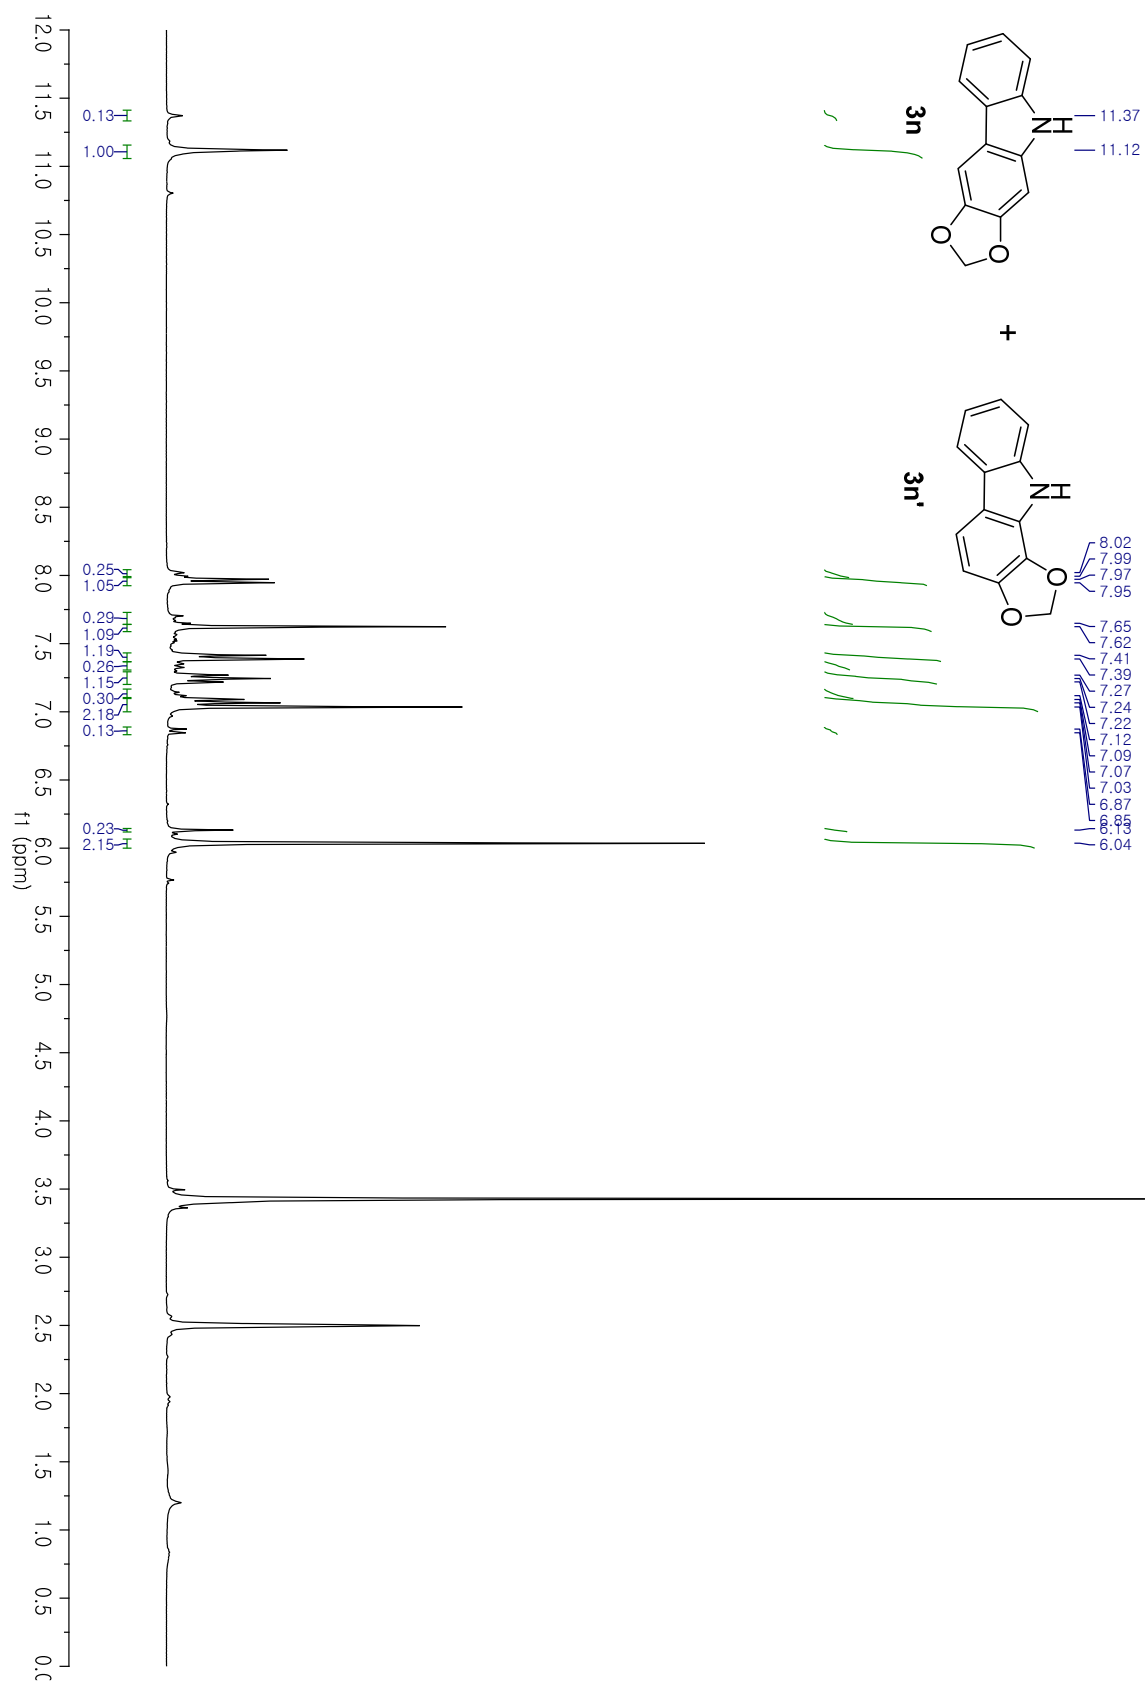

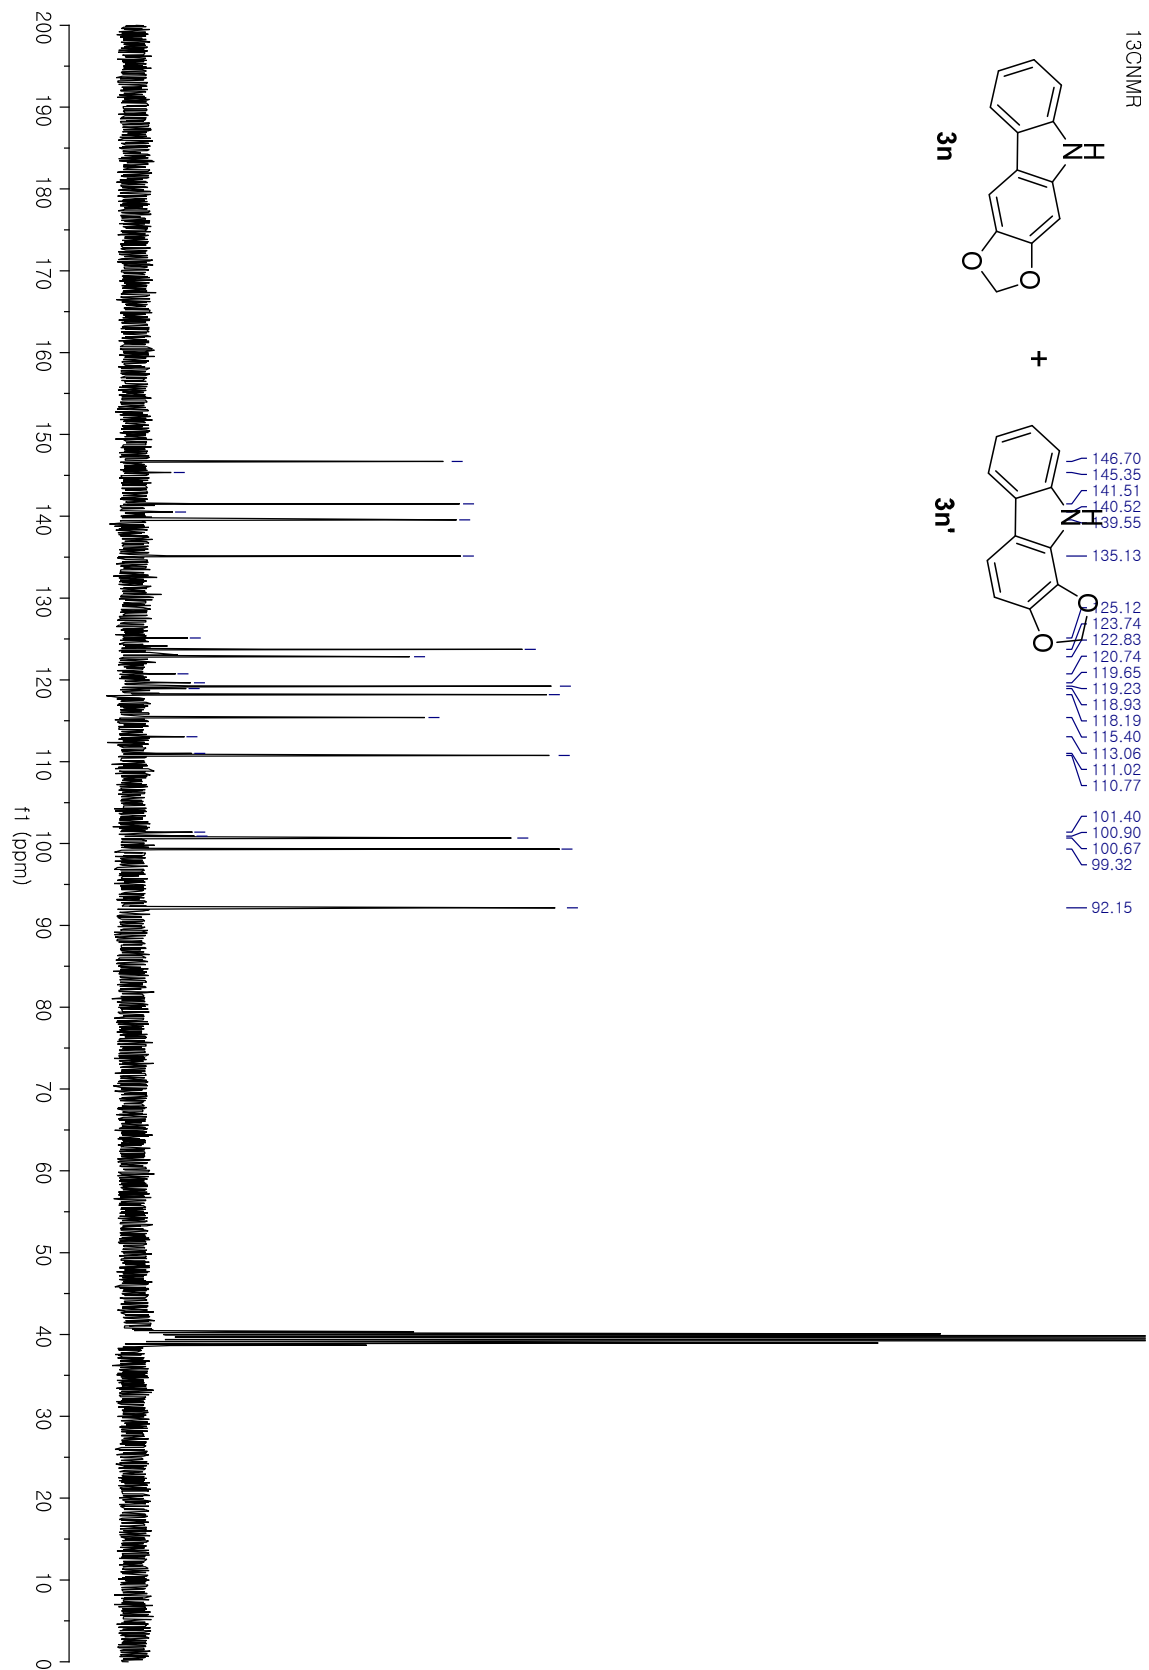

### **5H-[1,3]dioxolo[4,5-*b*]carbazole (3n)**

From reaction of 5-bromo-6-nitrobenzo[d][1,3]dioxole **1n** with phenylboronic acid **2a**

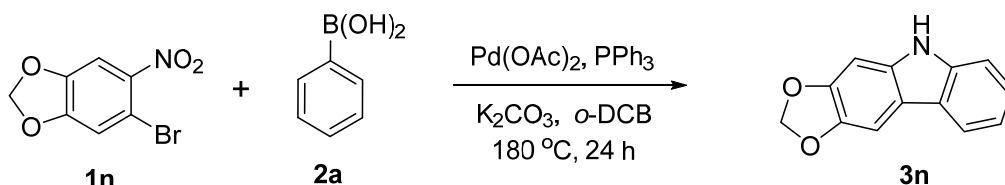

To a re-sealable pressure tube (13 x 100 mm) equipped with magnetic stir bar were added 5-bromo-6-nitrobenzo[d][1,3]dioxole **1n** (100 mg, 0.5 mmol, 100 mol%), phenylboronic acid **2a** (94 mg, 0.65 mmol, 130 mol%), Pd(OAc)<sub>2</sub> (2.2 mg, 0.01 mmol, 2 mol%), PPh<sub>3</sub> (328 mg, 1.25 mmol, 250 mol %), K<sub>2</sub>CO<sub>3</sub> (138 mg, 1 mmol, 200 mol%) and *o*-DCB (1 mL, 0.5 M concentration with respect to 5-bromo-6-nitrobenzo[d][1,3]dioxole **1n**). The mixture was heated at 180 °C (oil bath temperature) for 24 hr, at which point the reaction mixture was allowed to cool to ambient temperature. The reaction mixture was filtered through a pad of celite and the resulting liquor was concentrated *in vacuo* and purified by flash column chromatography (SiO<sub>2</sub>) using 5% acetone in hexanes as eluant to give **3n** as a white solid (80 mg, 76% yield). <sup>1</sup>H and <sup>13</sup>C NMR data were consistent with literature values.<sup>11</sup>

**TLC (SiO<sub>2</sub>)**: R<sub>f</sub> = 0.42 (Acetone:hexanes, 1:5).

**<sup>1</sup>H NMR** (300 MHz, DMSO) δ 11.08 (s, 1H), 7.96 (d, *J* = 7.7 Hz, 1H), 7.62 (s, 1H), 7.40 (d, *J* = 8.0 Hz, 1H), 7.24 (t, *J* = 7.5 Hz, 1H), 7.09 – 7.02 (m, 2H), 6.03 (s, 2H).

**<sup>13</sup>C NMR** (75 MHz, DMSO) δ 146.72, 141.52, 139.56, 135.14, 123.76, 122.83, 119.26, 118.20, 115.40, 110.79, 100.69, 99.36, 92.16.

**FTIR** (neat) ν 3390, 1715, 1324, 1049, 982, 739 cm<sup>-1</sup>.

**LRMS** *m/z* (EI): 212.0 (M<sup>+</sup>+1), 211.1

(11) S. Chakraborty, G. Chattopadhyay and C. Saha, *J. Heterocycl. Chem.*, 2013, **50**, 91-98.

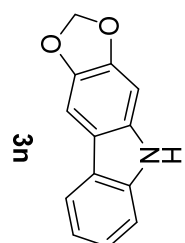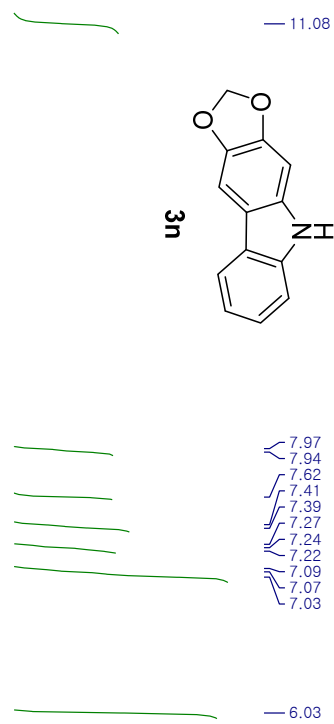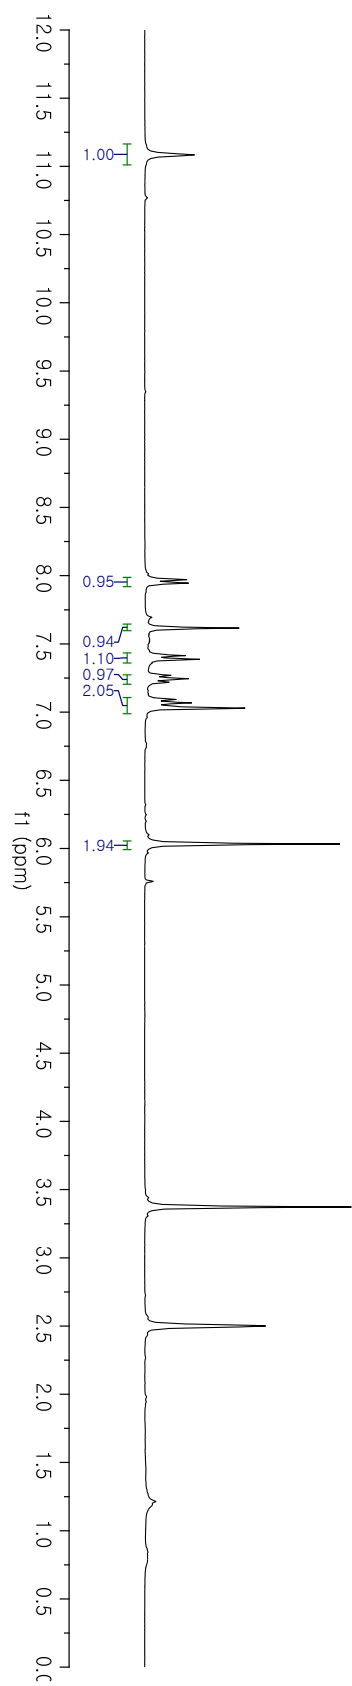

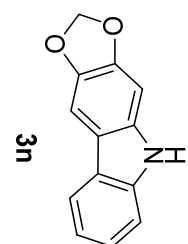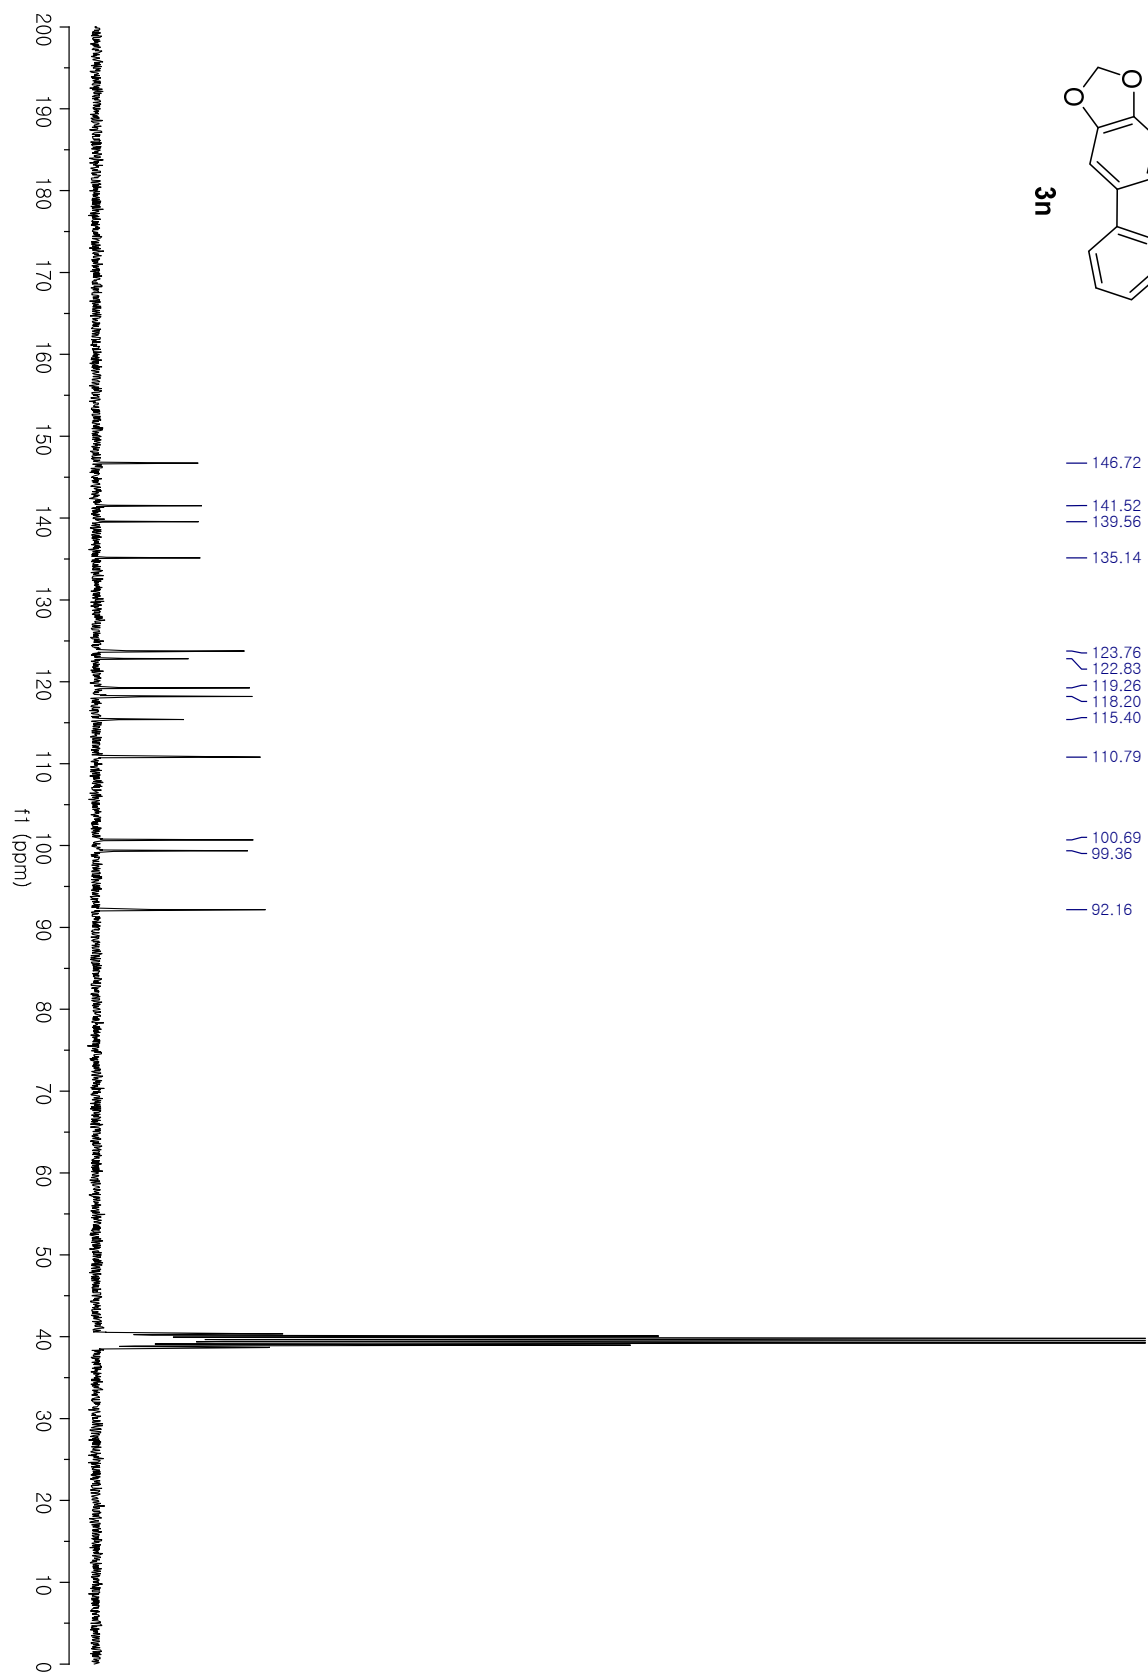



### 3-Methoxy-2-methyl-9Hcarbazole (3o) and 1-Methoxy-2-methyl-9Hcarbazole (3o')

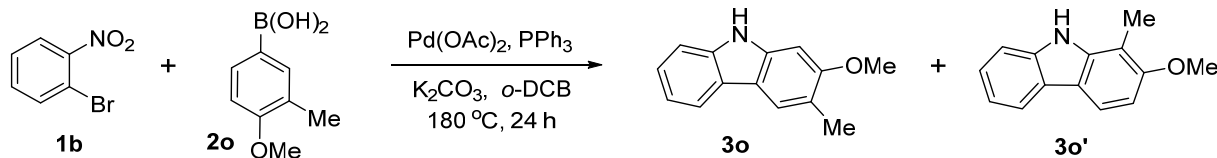

To a re-sealable pressure tube (13 x 100 mm) equipped with magnetic stir bar were added 1-bromo-2-nitrobenzene **1b** (100 mg, 0.5 mmol, 100 mol%), (4-methoxy-3-methylphenyl)boronic acid **2o** (108 mg, 0.65 mmol, 130 mol%), Pd(OAc)<sub>2</sub> (2.2 mg, 0.01 mmol, 2 mol%), PPh<sub>3</sub> (328 mg, 1.25 mmol, 250 mol %), K<sub>2</sub>CO<sub>3</sub> (138 mg, 1 mmol, 200 mol%) and *o*-DCB (1 mL, 0.5 M concentration with respect to 1-bromo-2-nitrobenzene **1b**). The mixture was heated at 180 °C (oil bath temperature) for 48 hr, at which point the reaction mixture was allowed to cool to ambient temperature. The reaction mixture was filtered through a pad of celite and the resulting liquor was concentrated *in vacuo* and purified by flash column chromatography (SiO<sub>2</sub>) using 5% acetone in hexanes as eluant to give **3o** as yellow solid (54mg, 51% yield) and **3o'** as yellow solid (29mg, 27% yield). <sup>1</sup>H and <sup>13</sup>C NMR data were consistent with literature values.<sup>12, 13</sup>

### 3-Methoxy-2-methyl-9Hcarbazole (3o)

**TLC (SiO<sub>2</sub>):** R<sub>f</sub> = 0.27 (acetone:hexanes, 1:5).

**<sup>1</sup>H NMR** (300 MHz, Acetone) δ 10.10 (s, 1H), 7.96 (d, *J* = 7.7 Hz, 1H), 7.81 (s, 1H), 7.42 (d, *J* = 8.1 Hz, 1H), 7.28 – 7.23 (m, 1H), 7.13 – 7.08 (m, 1H), 7.02 (s, 1H), 3.90 (s, 3H), 2.31 (s, 3H).

**<sup>13</sup>C NMR** (75 MHz, Acetone) δ 158.18, 140.73, 140.68, 124.60, 124.12, 121.94, 119.79, 119.42, 118.89, 116.68, 111.28, 93.30, 55.67, 16.92.

**FTIR** (neat) : ν 3313, 3069, 1783, 1689, 1404, 1270, 1169 cm<sup>-1</sup>.

**LRMS** *m/z* (EI): 212.2(M<sup>+</sup>+1), 211.3, 196.6, 195.7, 167.5.

(12) R. Hesse, K. K. Gruner, O. Kataeva, A. W. Schmidt and H.-J. Knölker, *Chem.-Eur. J.*, 2013, **19**, 14098-14111.

(13) S. Kureel, R. Kapil and S. Popli, *Journal of the Chemical Society D: Chemical Communications*, 1969, 1120-1121.

**1-Methoxy-2-methyl-9Hcarbazole (3o')**

**TLC (SiO<sub>2</sub>)**:  $R_f = 0.28$  (acetone:hexanes, 1:5).

**<sup>1</sup>H NMR** (300 MHz, Acetone)  $\delta$  10.16 (s, 1H), 7.99 (d,  $J = 7.7$  Hz, 1H), 7.89 (d,  $J = 8.5$  Hz, 1H), 7.43 (d,  $J = 8.0$  Hz, 1H), 7.32 – 7.25 (m, 1H), 7.19 – 7.10 (m, 1H), 6.90 (d,  $J = 8.5$  Hz, 1H), 3.91 (s, 3H), 2.40 (s, 3H).

**<sup>13</sup>C NMR** (75 MHz, Acetone)  $\delta$  156.86, 141.66, 141.42, 125.16, 124.60, 120.13, 119.56, 118.53, 118.01, 111.33, 107.65, 104.63, 56.46, 10.15.

**FTIR** (neat) :  $\nu$  3313, 3069, 1783, 1689, 1404, 1270, 1169  $\text{cm}^{-1}$ .

**LRMS**  $m/z$  (EI): 212.3 ( $M^+ + 1$ ), 211.4, 196.6, 195.7, 167.7.

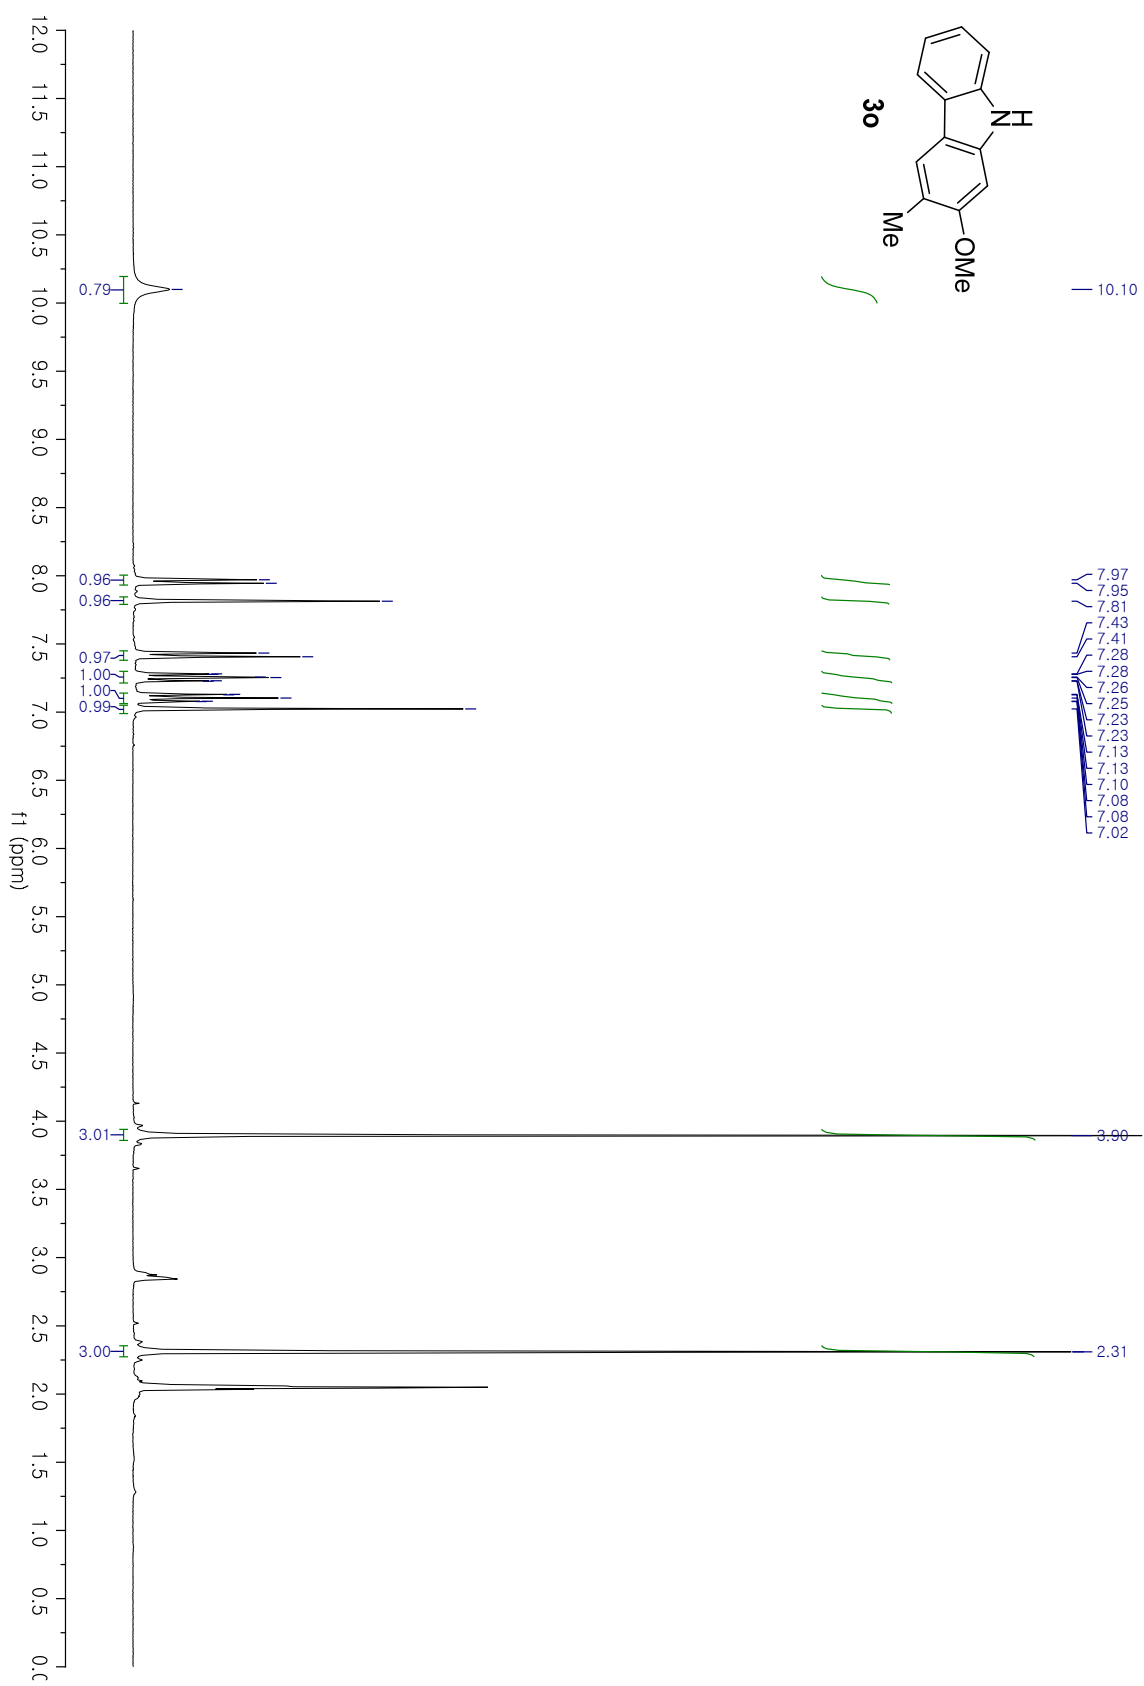

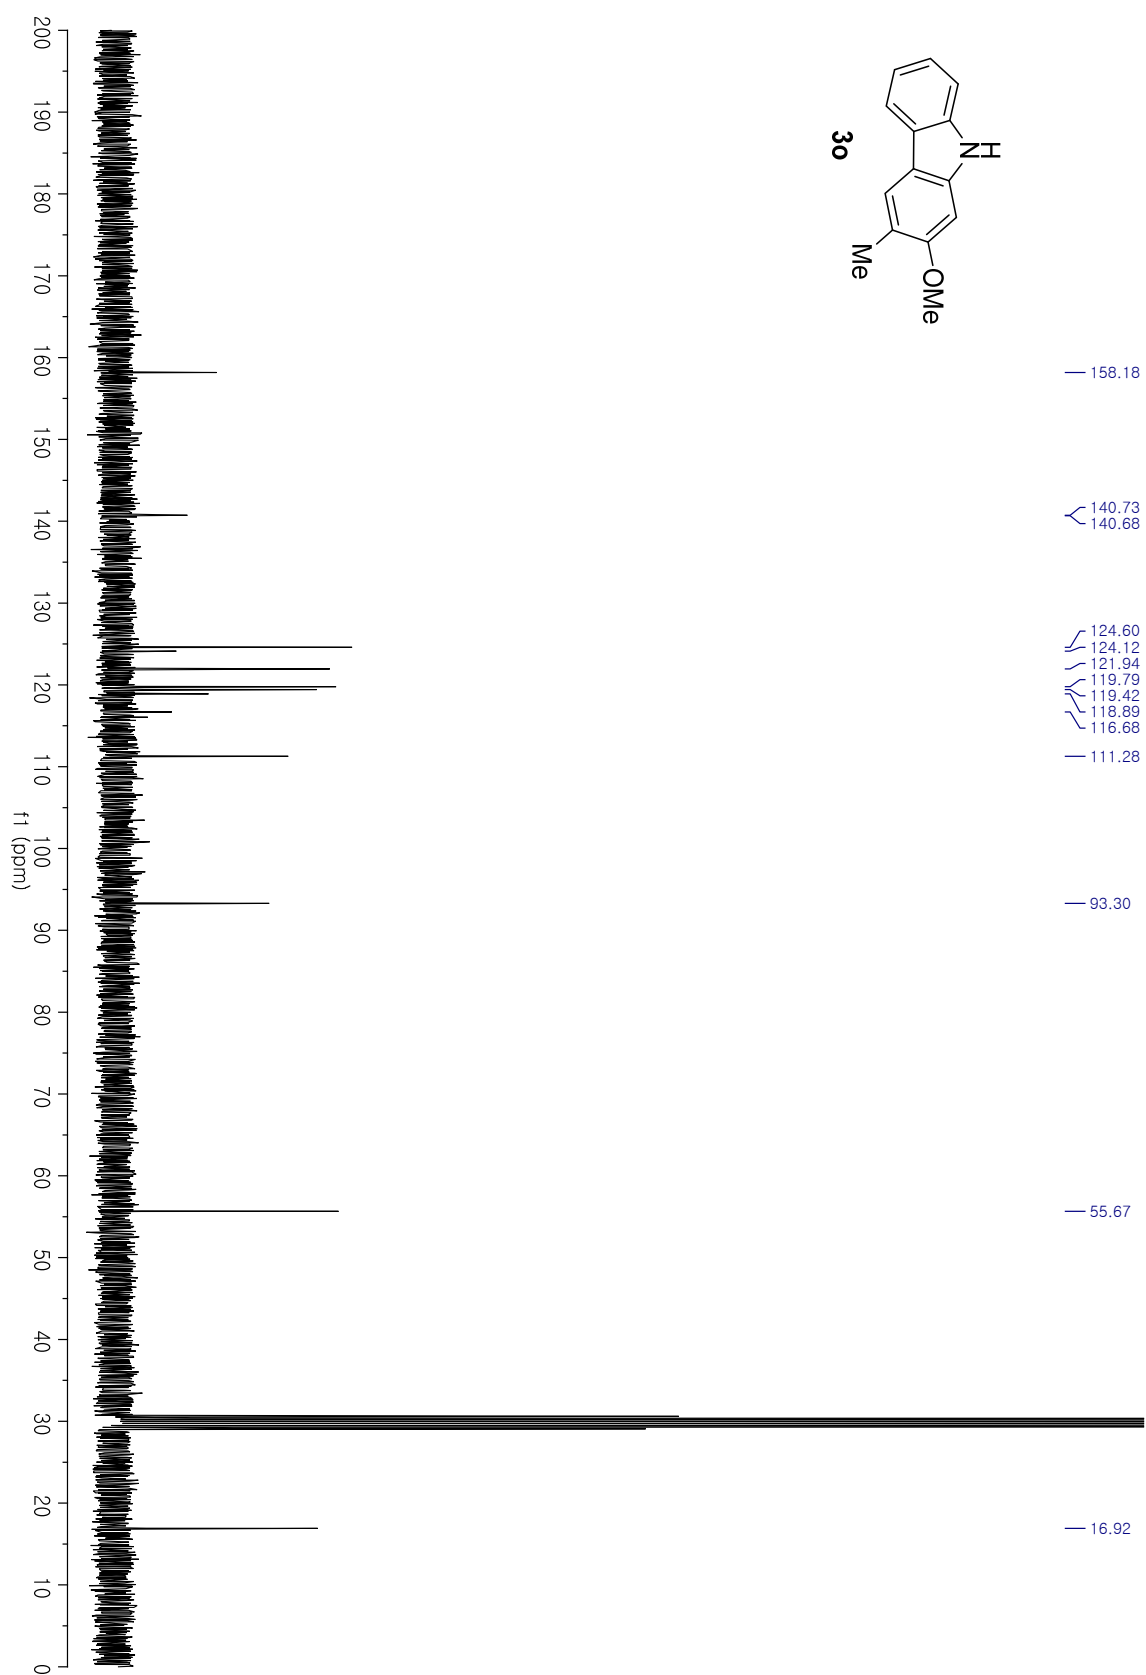

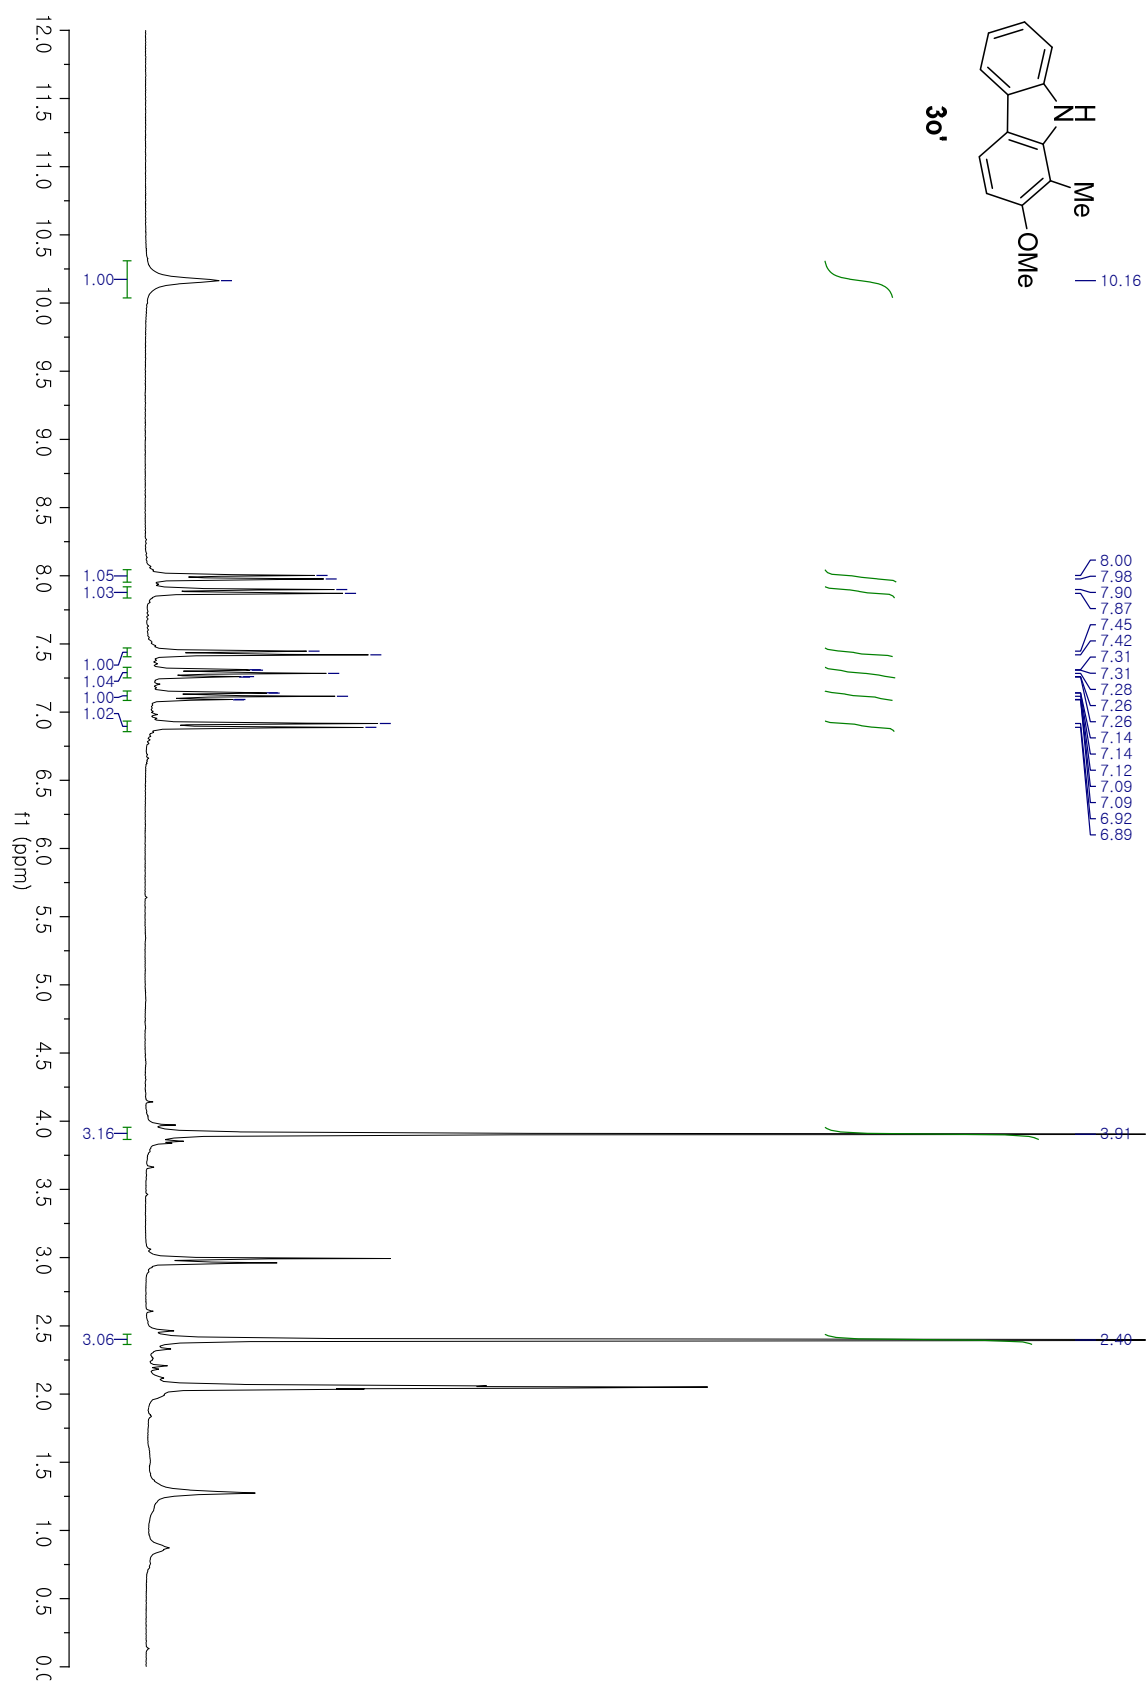

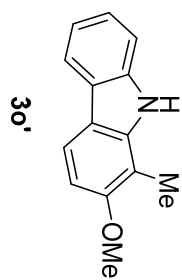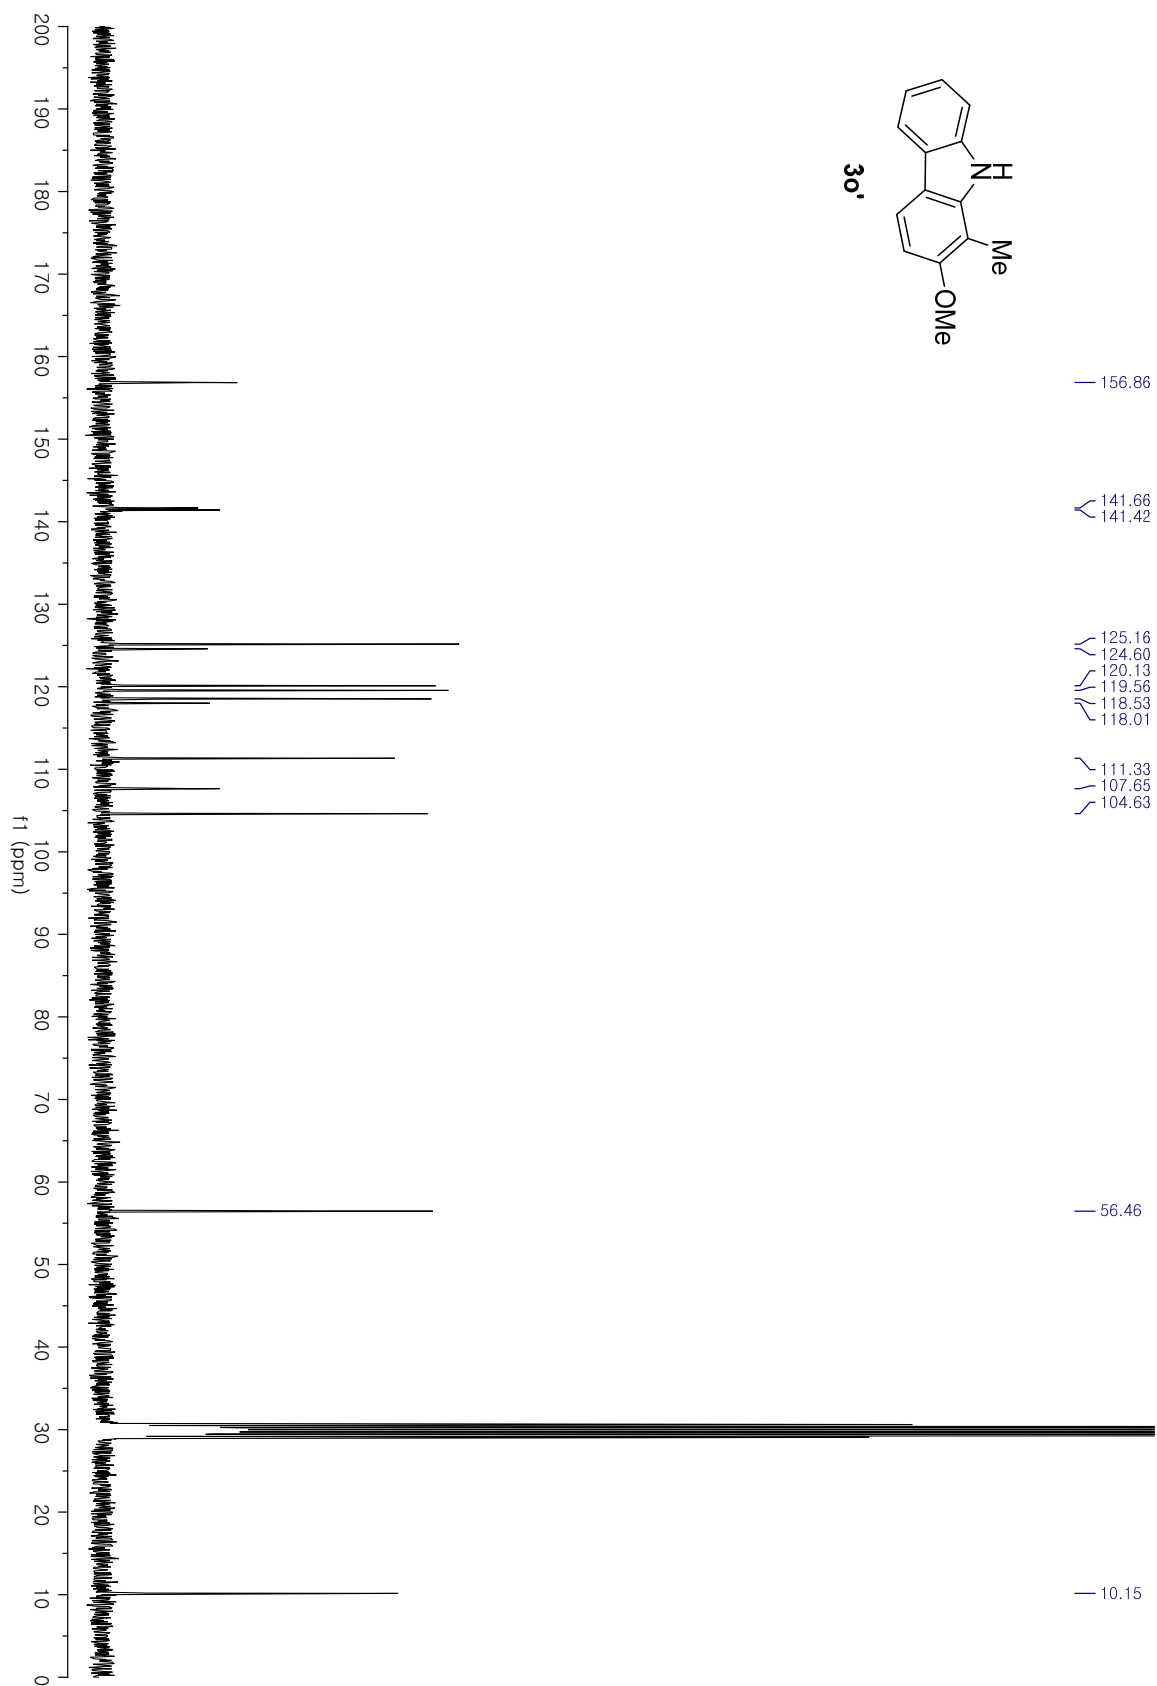

### **3-Methoxy-9H-carbazole (3p)**

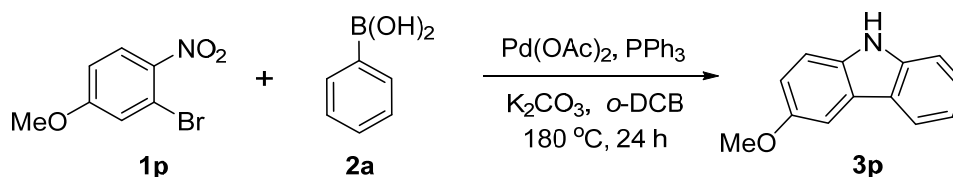

To a re-sealable pressure tube (13 x 100 mm) equipped with magnetic stir bar were added 2-bromo-4-methoxy-1-nitrobenzene **1p** (116 mg, 0.5 mmol, 100 mol%), phenylboronic acid **2a** (80 mg, 0.65 mmol, 130 mol%), Pd(OAc)<sub>2</sub> (2.2 mg, 0.01 mmol, 2 mol%), PPh<sub>3</sub> (328 mg, 1.25 mmol, 250 mol %), K<sub>2</sub>CO<sub>3</sub> (138 mg, 1 mmol, 200 mol%) and *o*-DCB (1 mL, 0.5 M concentration with respect to 2-bromo-4-methoxy-1-nitrobenzene **1p**). The mixture was heated at 180 °C (oil bath temperature) for 24 hr, at which point the reaction mixture was allowed to cool to ambient temperature. The reaction mixture was filtered through a pad of celite and the resulting liquor was concentrated *in vacuo* and purified by flash column chromatography (SiO<sub>2</sub>) using 5% acetone in hexanes as eluant to give **3p** as a brown solid (59 mg, 60% yield). <sup>1</sup>H and <sup>13</sup>C NMR data were consistent with literature values.<sup>1</sup>

**TLC (SiO<sub>2</sub>)**: R<sub>f</sub> = 0.32 (acetones:hexanes, 1:5).

**<sup>1</sup>H NMR** (300 MHz, CDCl<sub>3</sub>) δ 8.02 (d, *J* = 7.8 Hz, 1H), 7.85 (s, 1H), 7.54 (d, *J* = 2.4 Hz, 1H), 7.44 – 7.30 (m, 2H), 7.28 – 7.12 (m, 2H), 7.05 (dd, *J* = 8.7, 2.4 Hz, 1H), 3.91 (s, 3H).

**<sup>13</sup>C NMR** (75 MHz, CDCl<sub>3</sub>) δ 153.88, 140.32, 134.42, 125.89, 123.76, 123.34, 120.34, 119.10, 115.16, 111.46, 110.88, 103.13, 56.14.

**FTIR** (neat) ν 3405, 1788, 1685, 1400, 1260, 1031 cm<sup>-1</sup>.

**LRMS** *m/z* (EI): 198.3 (M<sup>+</sup>+1), 197.4, 182.7, 181.7, 154.3, 101.5.

---

(1) C. Suzuki, K. Hirano, T. Satoh and M. Miura, *Org. Lett.*, 2015, **17**, 1597-1600.

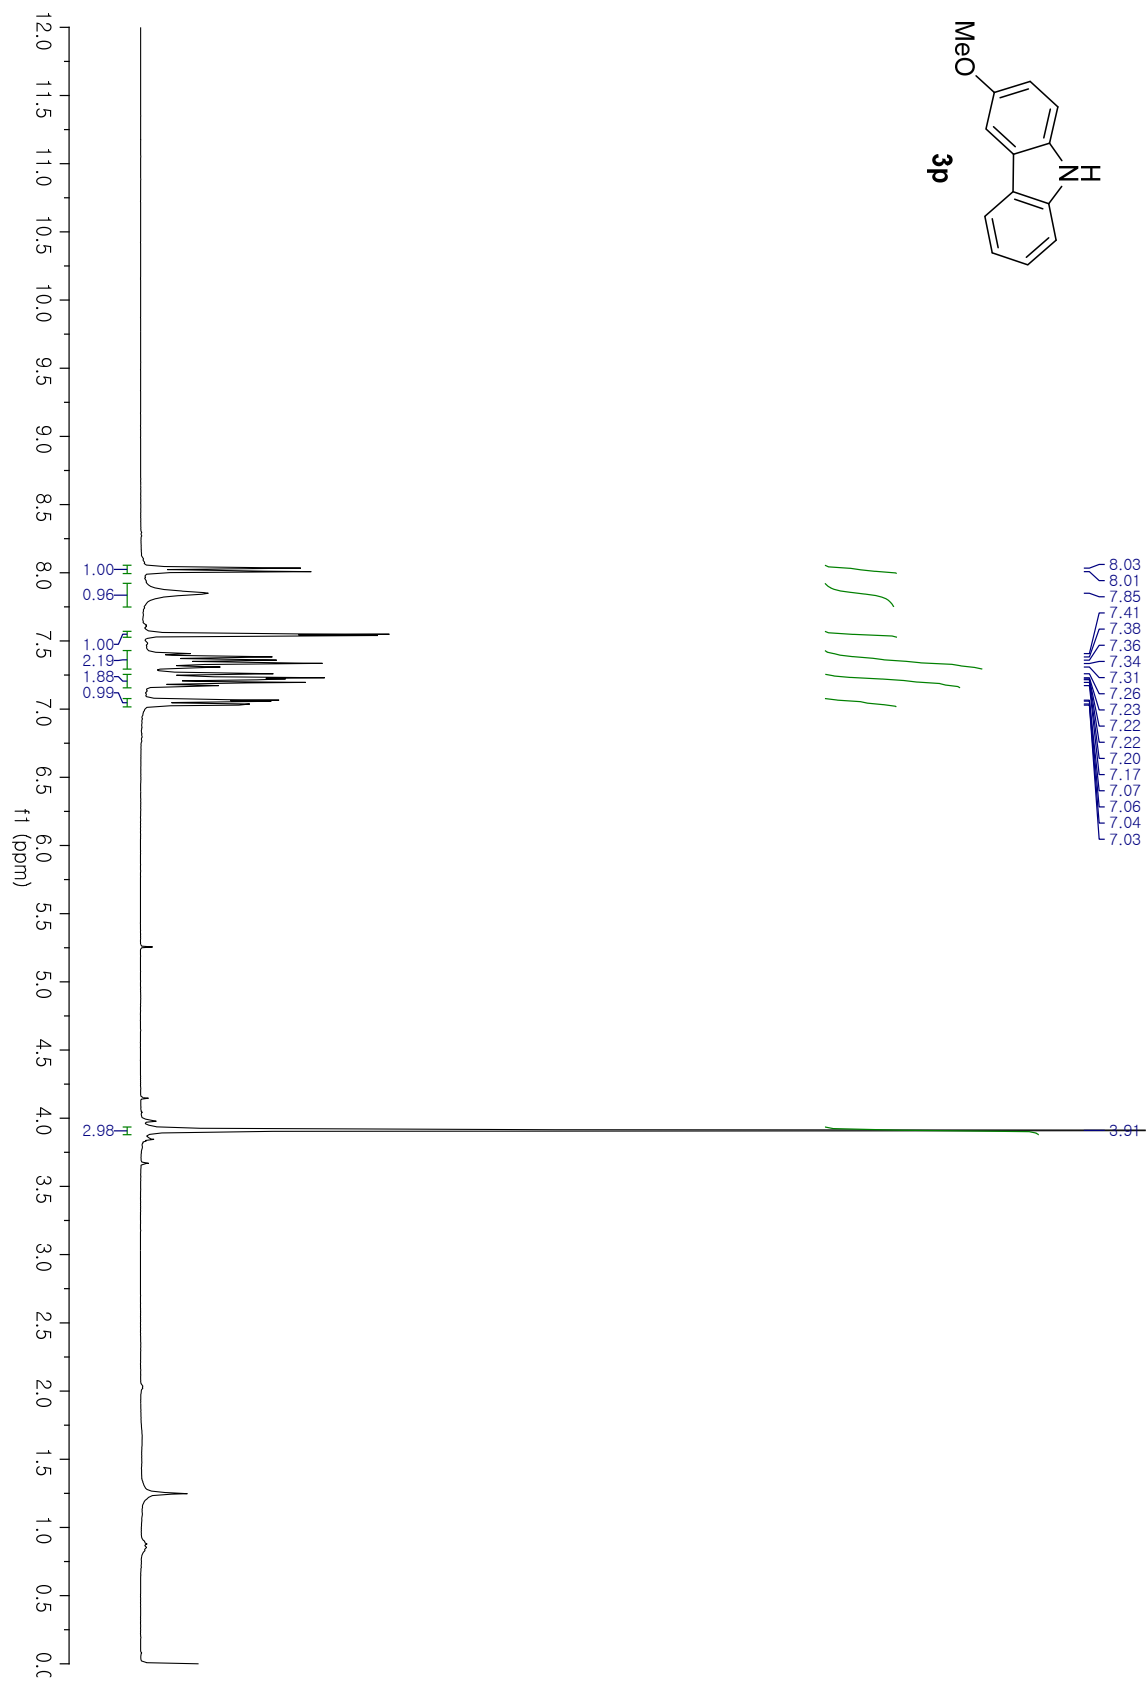



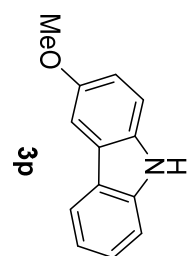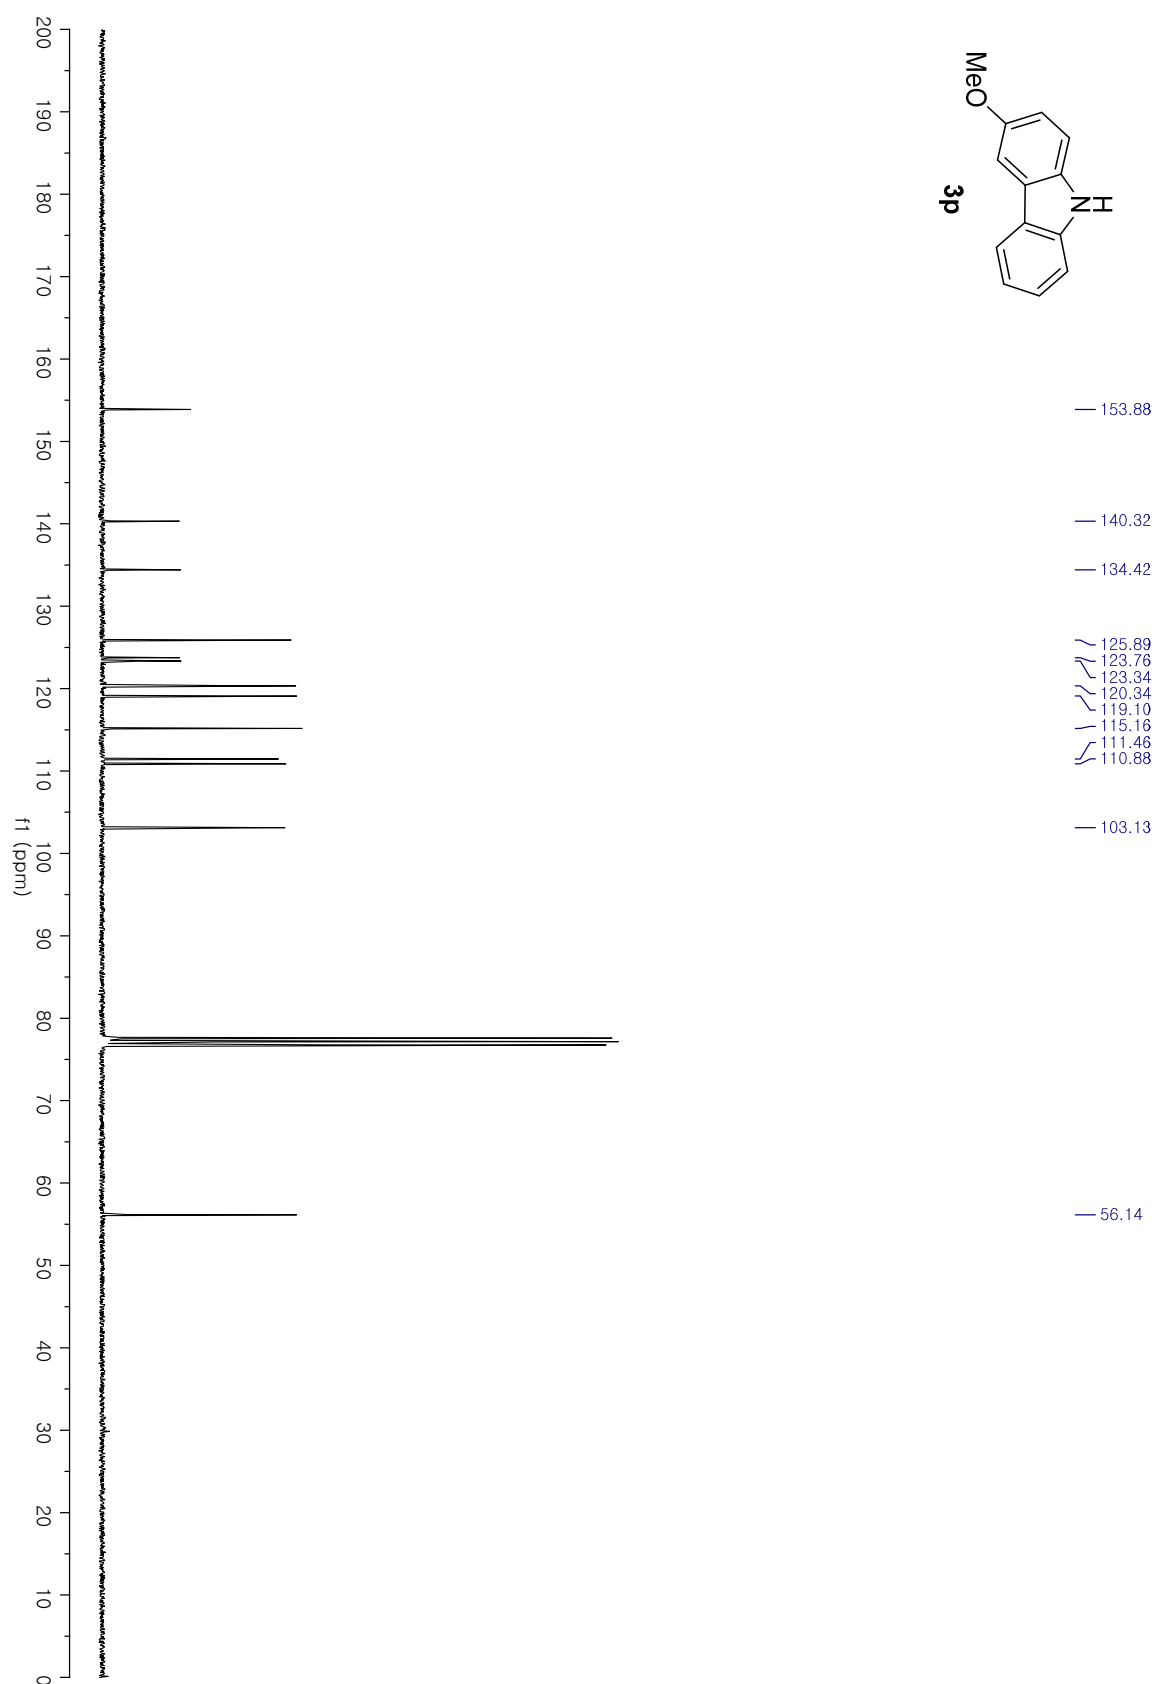

### 2,3-Dimethoxy-9H-carbazole (3q)

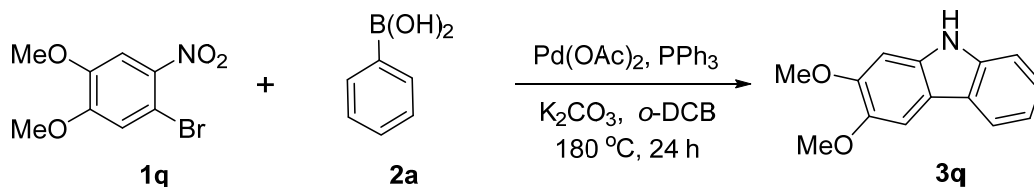

To a re-sealable pressure tube (13 x 100 mm) equipped with magnetic stir bar were added 1-bromo-4,5-dimethoxy-2-nitrobenzene **1q** (131mg, 0.5 mmol, 100 mol%), phenylboronic acid **2a** (80 mg, 0.65 mmol, 130 mol%), Pd(OAc)<sub>2</sub> (2.2 mg, 0.01 mmol, 2 mol%), PPh<sub>3</sub> (328 mg, 1.25 mmol, 250 mol %), K<sub>2</sub>CO<sub>3</sub> (138 mg, 1 mmol, 200 mol%) and *o*-DCB (1 mL, 0.5 M concentration with respect to 1-bromo-4,5-dimethoxy-2-nitrobenzene **1q**). The mixture was heated at 180 °C (oil bath temperature) for 24 hr, at which point the reaction mixture was allowed to cool to ambient temperature. The reaction mixture was filtered through a pad of celite and the resulting liquor was concentrated *in vacuo* and purified by flash column chromatography (SiO<sub>2</sub>) using 7% acetone in hexanes as eluant to give **3q** as a white solid (70 mg, 62% yield). <sup>1</sup>H and <sup>13</sup>C NMR data were consistent with literature values.<sup>14</sup>

**TLC (SiO<sub>2</sub>):** R<sub>f</sub> = 0.28 (acetone:hexanes, 1:5).

**<sup>1</sup>H NMR** (300 MHz, DMSO) δ 10.98 (s, 1H), 7.99 (d, *J* = 7.7 Hz, 1H), 7.66 (s, 1H), 7.43 (d, *J* = 8.0 Hz, 1H), 7.26 (t, *J* = 7.6 Hz, 1H), 7.08 (t, *J* = 7.4 Hz, 1H), 7.04 (s, 1H), 3.86 (s, 3H), 3.85 (s, 3H).

**<sup>13</sup>C NMR** (75 MHz, DMSO<sub>3</sub>) δ 149.18, 143.71, 139.56, 134.63, 123.67, 123.00, 119.26, 118.12, 114.30, 110.72, 103.33, 94.62, 56.21, 55.63.

**FTIR** (neat) ν 3337, 2917, 1402, 1186, 1090 cm<sup>-1</sup>.

**LRMS** *m/z* (EI): 228.2 (M<sup>+</sup>+1), 227.5, 212.7, 211.7, 184.5.

(14) B. Liegault, D. Lee, M. P. Huestis, D. R. Stuart and K. Fagnou, *J. Org. Chem.*, 2008, **73**, 5022-5028.

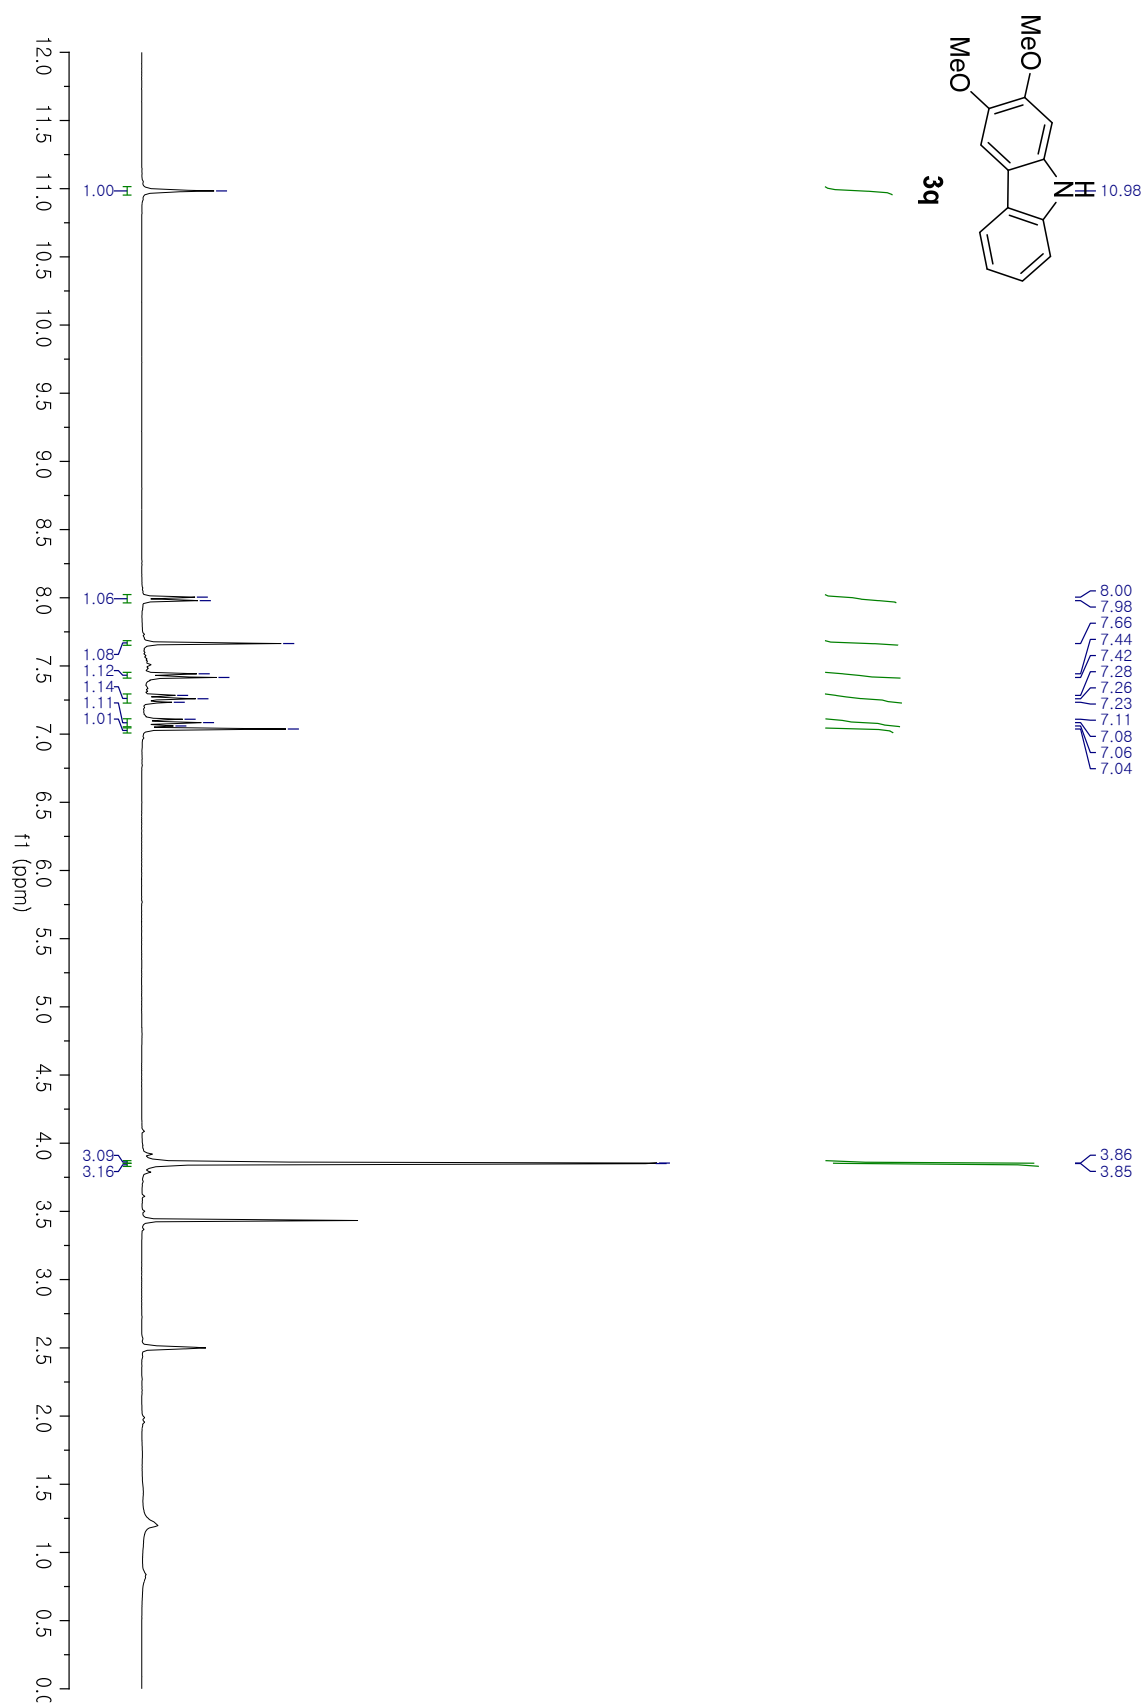

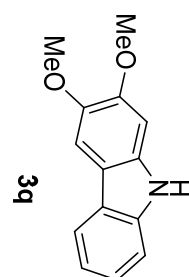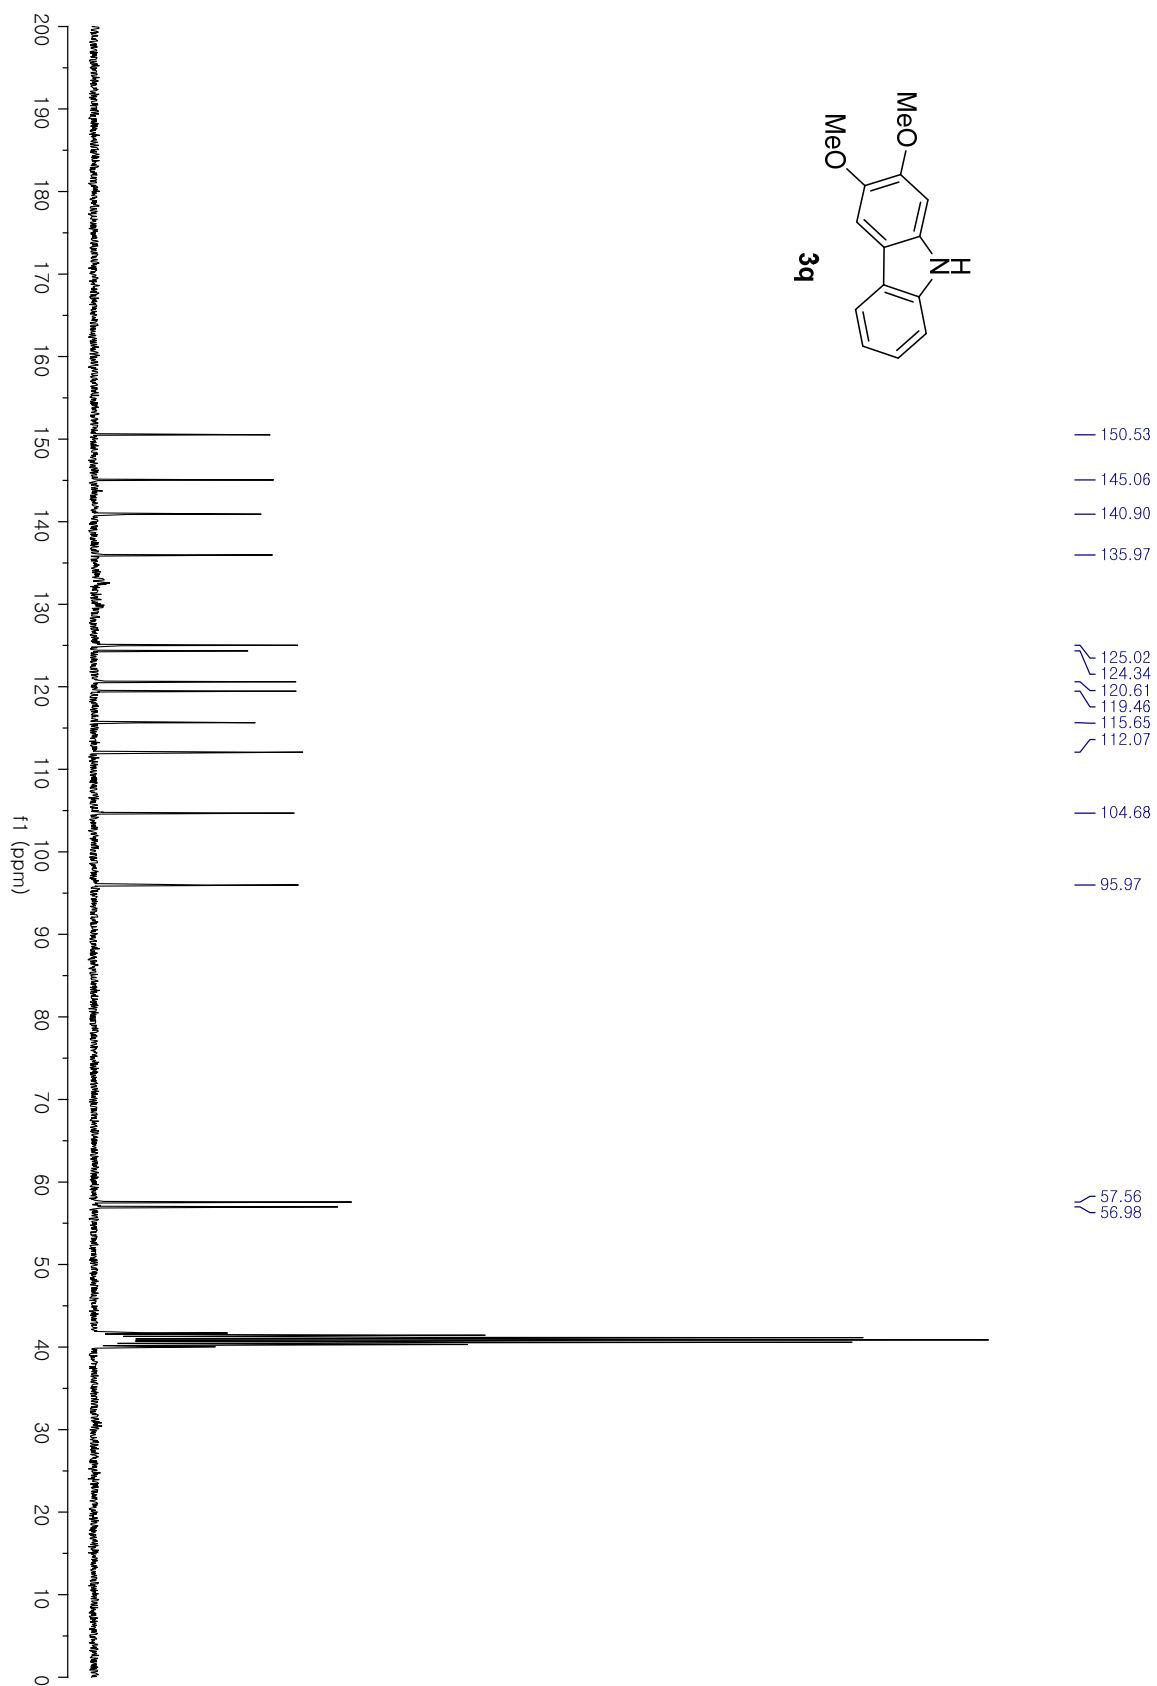

### 2-Methoxy-7-methyl-9H-carbazole (3s)

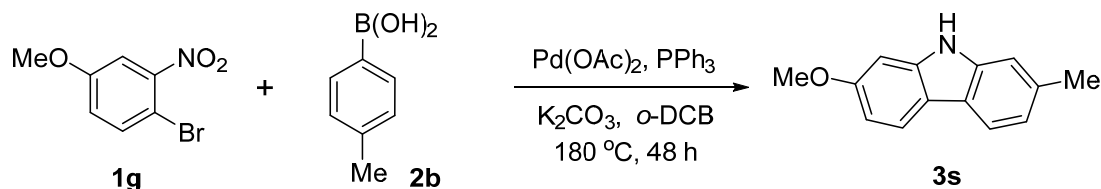

To a re-sealable pressure tube (13 x 100 mm) equipped with magnetic stir bar were added 1-bromo-4-methoxy-2-nitrobenzene **1g** (120 mg, 0.5 mmol, 100 mol%), *p*-tolylboronic acid **2b** (88 mg, 0.65 mmol, 130 mol%), Pd(OAc)<sub>2</sub> (2.2 mg, 0.01 mmol, 2 mol%), PPh<sub>3</sub> (328 mg, 1.25 mmol, 250 mol %), K<sub>2</sub>CO<sub>3</sub> (138 mg, 1 mmol, 200 mol%) and *o*-DCB (1 mL, 0.5 M concentration with respect to 1-bromo-4-methoxy-2-nitrobenzene **1g**). The mixture was heated at 180 °C (oil bath temperature) for 48 hr, at which point the reaction mixture was allowed to cool to ambient temperature. The reaction mixture was filtered through a pad of celite and the resulting liquor was concentrated *in vacuo* and purified by flash column chromatography (SiO<sub>2</sub>) using 5% acetone in hexanes as eluant to give **3s** as a white solid (75 mg, 71% yield). <sup>1</sup>H and <sup>13</sup>C NMR data were consistent with literature values.<sup>15</sup>

**TLC (SiO<sub>2</sub>):** R<sub>f</sub> = 0.31 (acetone:hexanes, 1:5).

**<sup>1</sup>H NMR** (300 MHz, DMSO) δ 10.98 (s, 1H), 7.88 (d, *J* = 8.5 Hz, 1H), 7.84 (d, *J* = 7.9 Hz, 1H), 7.21 (s, 1H), 6.96 – 6.88 (m, 2H), 6.73 (dd, *J* = 8.5, 2.2 Hz, 1H), 3.82 (s, 3H), 2.44 (s, 3H).

**<sup>13</sup>C NMR** (75 MHz DMSO) δ 158.14, 141.07, 140.22, 133.50, 120.54, 120.44, 120.03, 119.02, 116.32, 110.73, 107.42, 94.53, 55.25, 21.65.

**FTIR** (neat) ν 3394, 1726, 1366, 1219, 1091 cm<sup>-1</sup>.

**LRMS** *m/z* (EI): 212.5 (M<sup>+</sup>+1), 211.6, 196.6, 195.7, 168.5.

(15) C. Schuster, C. Boerger, K. K. Julich-Gruner, R. Hesse, A. Jaeger, G. Kaufmann, A. W. Schmidt and H.-J. Knoelker, *Eur. J. Org. Chem.*, 2014, 4741-4752.

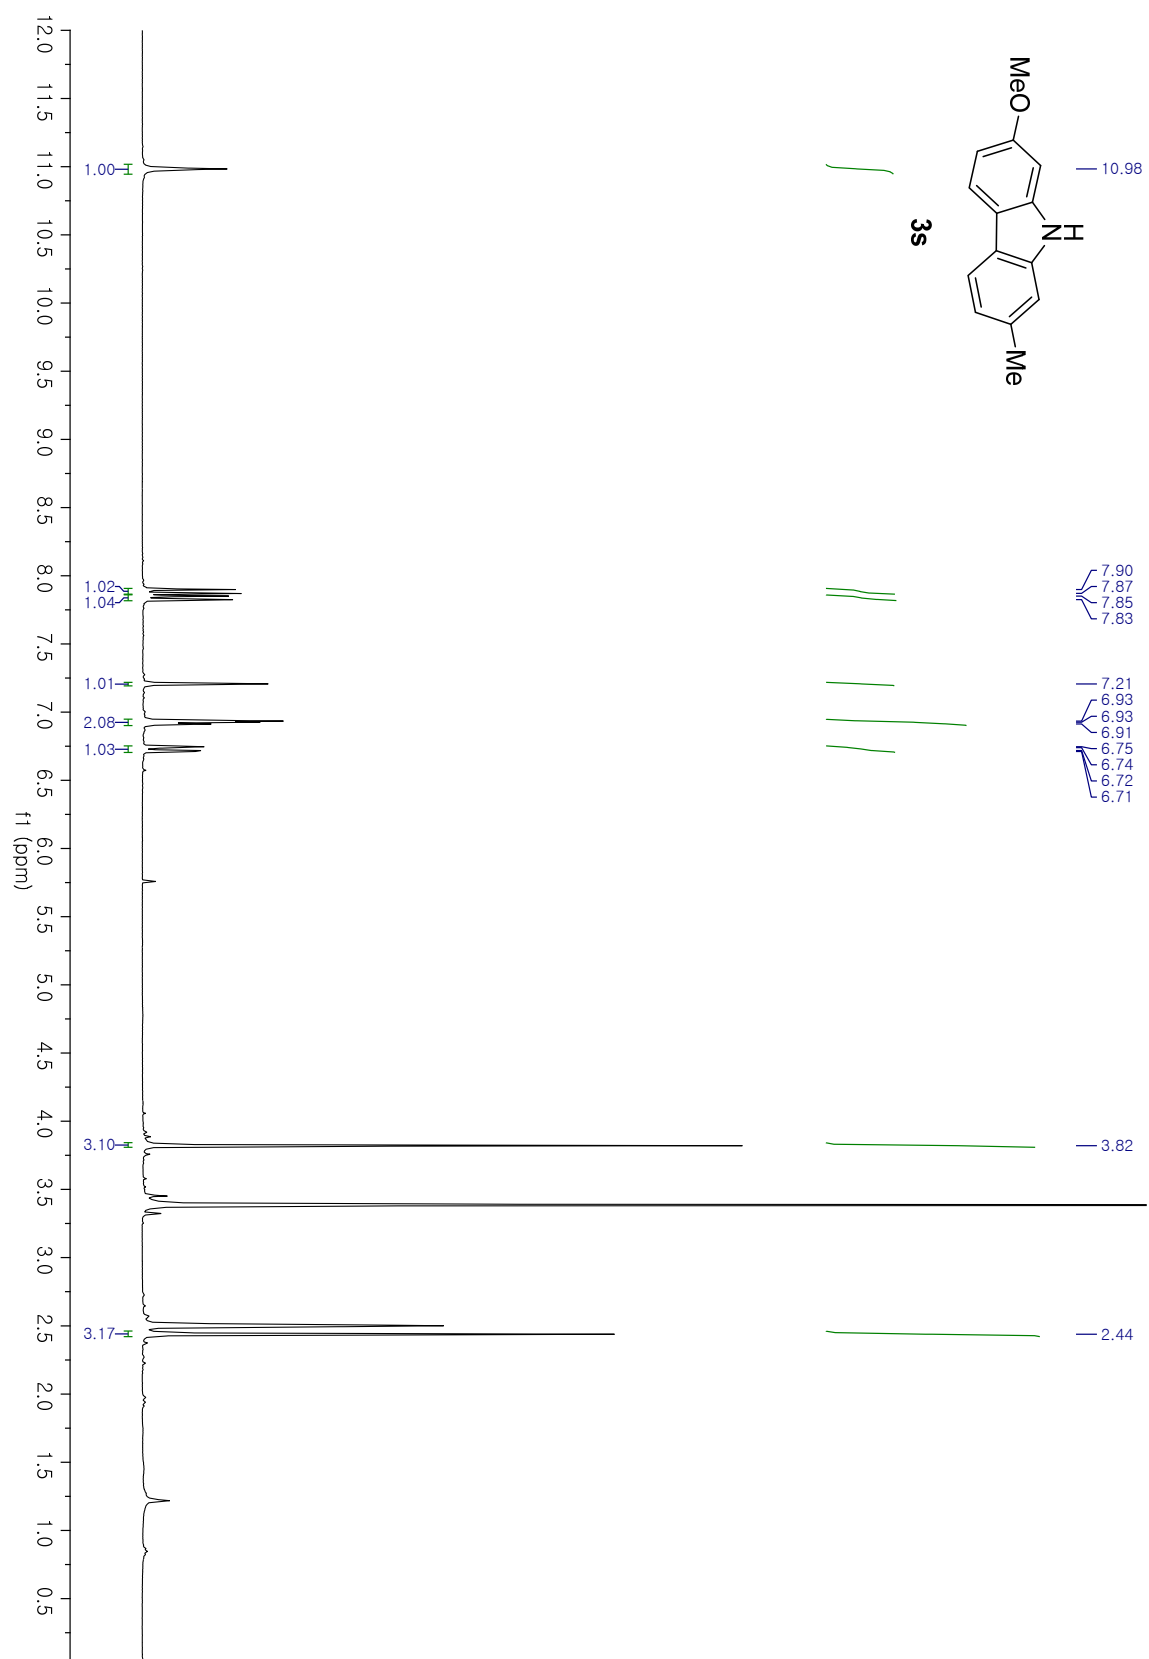

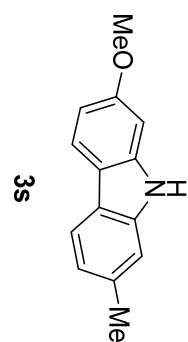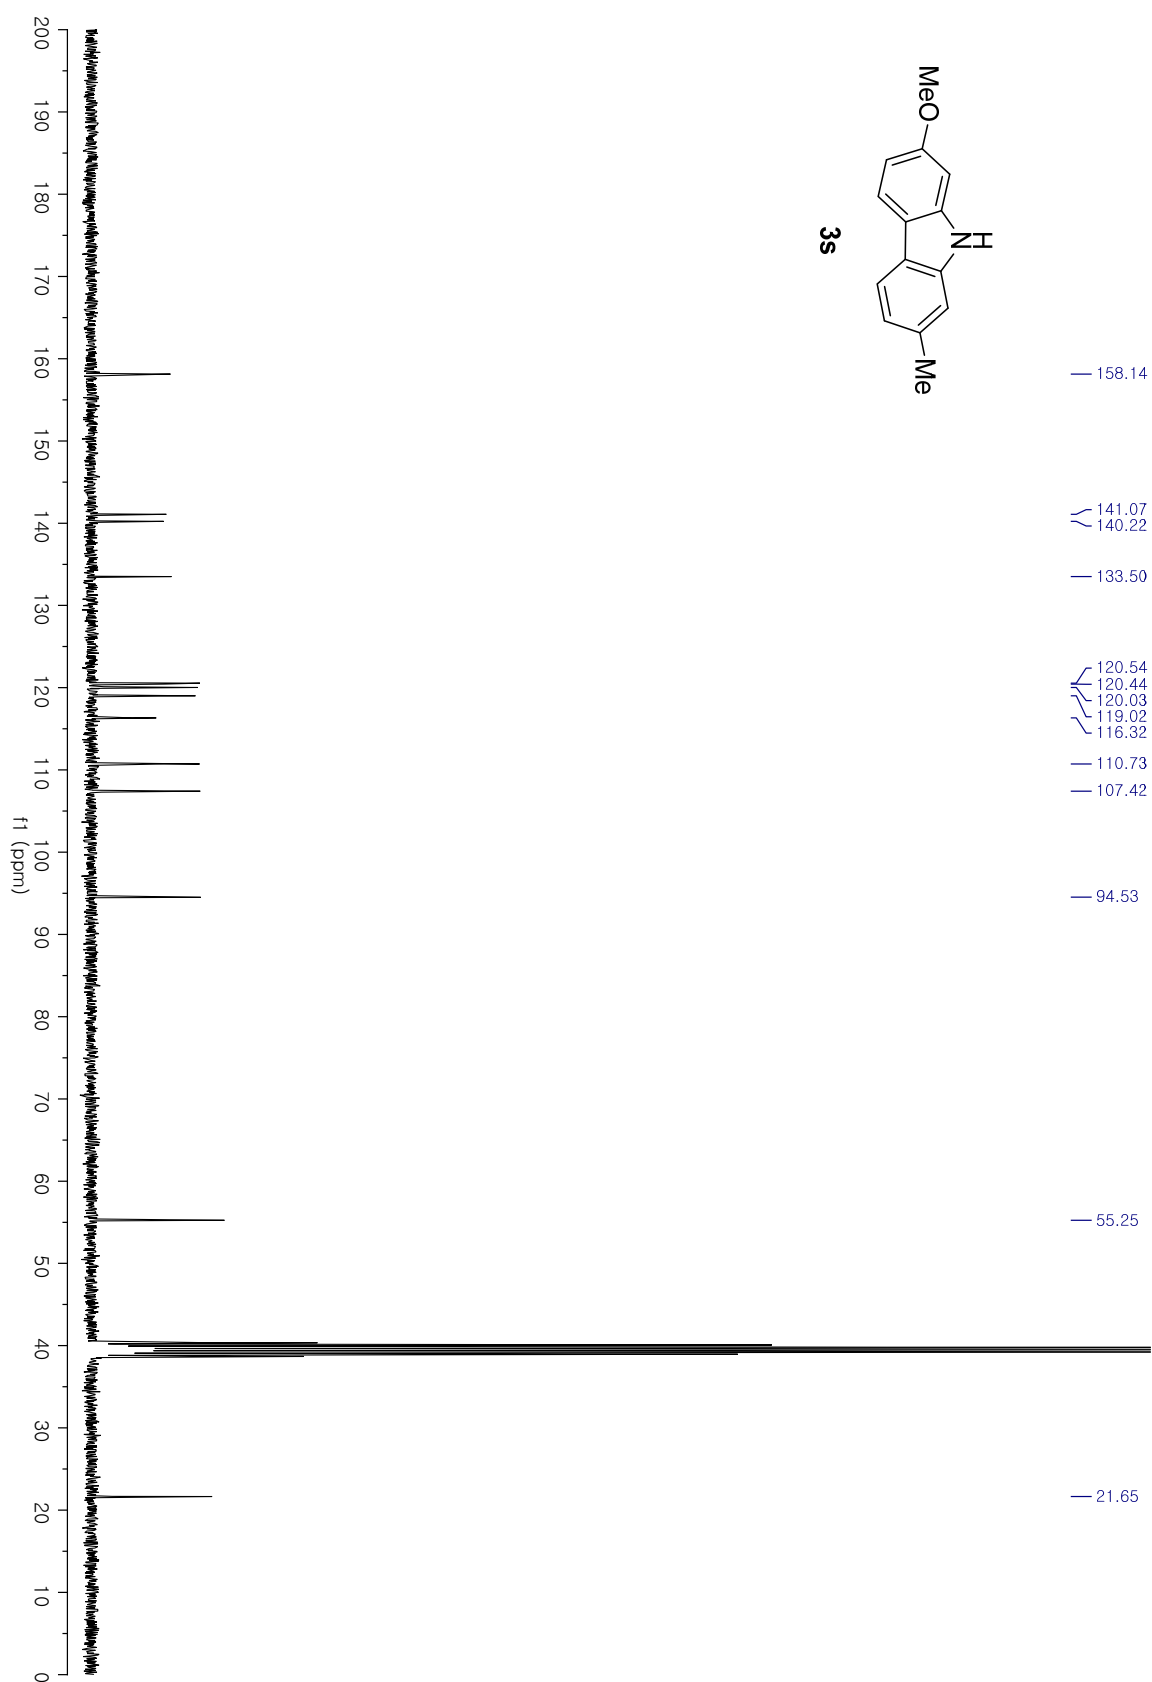

### **2-Fluoro-7-methoxy-9H-carbazole (3t)**

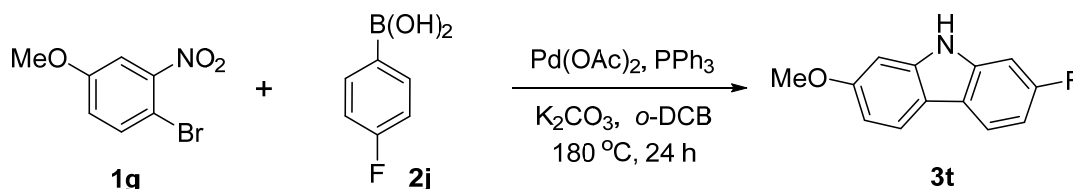

To a re-sealable pressure tube (13 x 100 mm) equipped with magnetic stir bar were added 1-bromo-4-methoxy-2-nitrobenzene **1g** (120 mg, 0.5 mmol, 100 mol%), (4-fluorophenyl)boronic acid **2j** (91 mg, 0.65 mmol, 130 mol%), Pd(OAc)<sub>2</sub> (2.2 mg, 0.01 mmol, 2 mol%), PPh<sub>3</sub> (328 mg, 1.25 mmol, 250 mol %), K<sub>2</sub>CO<sub>3</sub> (138 mg, 1 mmol, 200 mol%) and *o*-DCB (1 mL, 0.5 M concentration with respect to 1-bromo-4-methoxy-2-nitrobenzene **1g**). The mixture was heated at 180 °C (oil bath temperature) for 24 hr, at which point the reaction mixture was allowed to cool to ambient temperature. The reaction mixture was filtered through a pad of celite and the resulting liquor was concentrated *in vacuo* and purified by flash column chromatography (SiO<sub>2</sub>) using 5% acetone in hexanes as eluant to give **3t** as a white solid (71 mg, 66% yield).

**TLC (SiO<sub>2</sub>)**: R<sub>f</sub> = 0.37 (acetone:hexanes, 1:5).

**<sup>1</sup>H NMR** (300 MHz, CDCl<sub>3</sub>) δ 7.97 (br s, 1H), 7.87 (d, *J* = 8.5 Hz, 1H), 7.85 (d, *J* = 8.3 Hz, 1H), 7.06 (dd, *J* = 9.5, 2.3 Hz, 1H), 6.98 – 6.93 (m, 1H), 6.90 (d, *J* = 2.2 Hz, 1H), 6.86 (dd, *J* = 8.5, 2.2 Hz, 1H), 3.90 (s, 1H).

**<sup>13</sup>C NMR** (75 MHz, CDCl<sub>3</sub>) δ 158.87, 141.31, 120.78, 120.38, 120.25, 116.91, 108.55, 107.82, 107.50, 97.63, 97.27, 95.02, 55.78.

**FTIR** (neat) ν 3192, 2843, 1539, 1406, 1155 cm<sup>-1</sup>.

**LRMS** *m/z* (EI): 216.5 (M<sup>+</sup>+1), 215.5, 200.6, 199.7, 172.5, 171.5

**HRMS** *m/z* (EI): calcd. For C<sub>13</sub>H<sub>10</sub>FNO (M<sup>+</sup>) 215.0747, found 215.0746



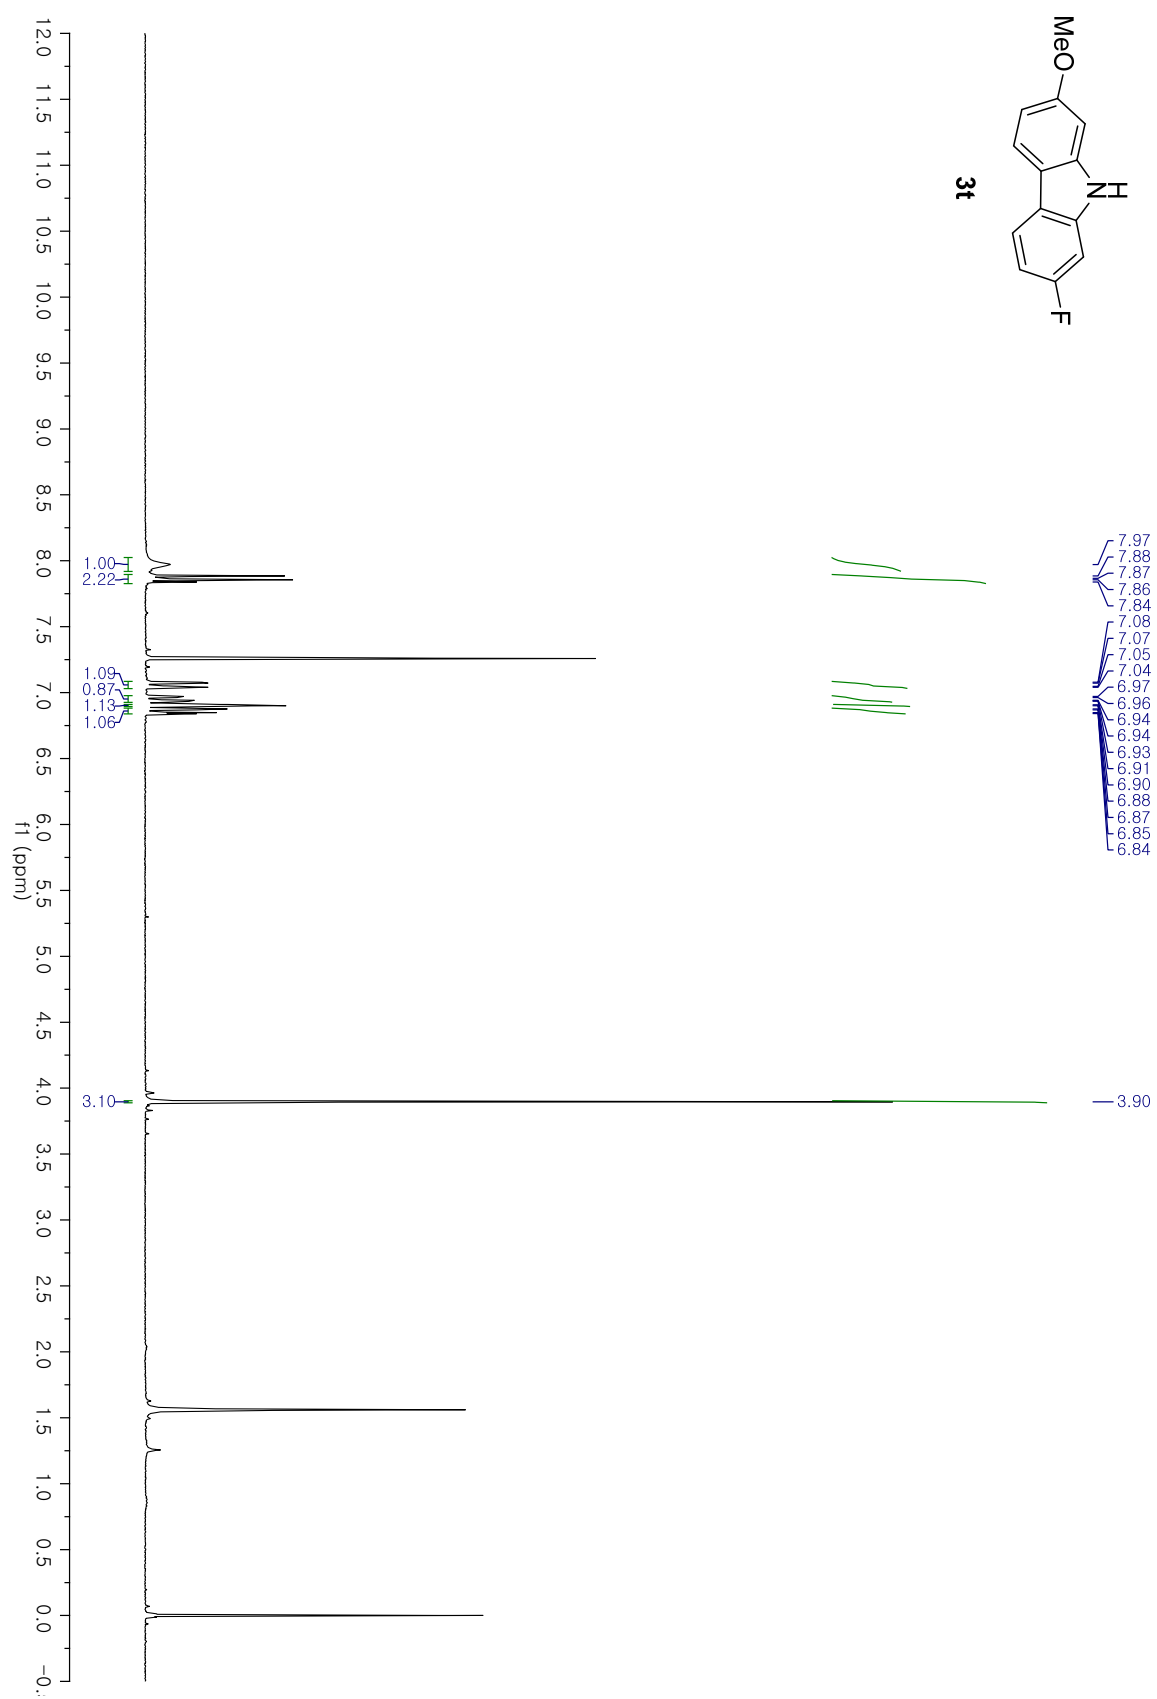

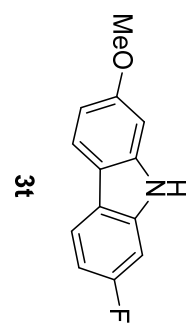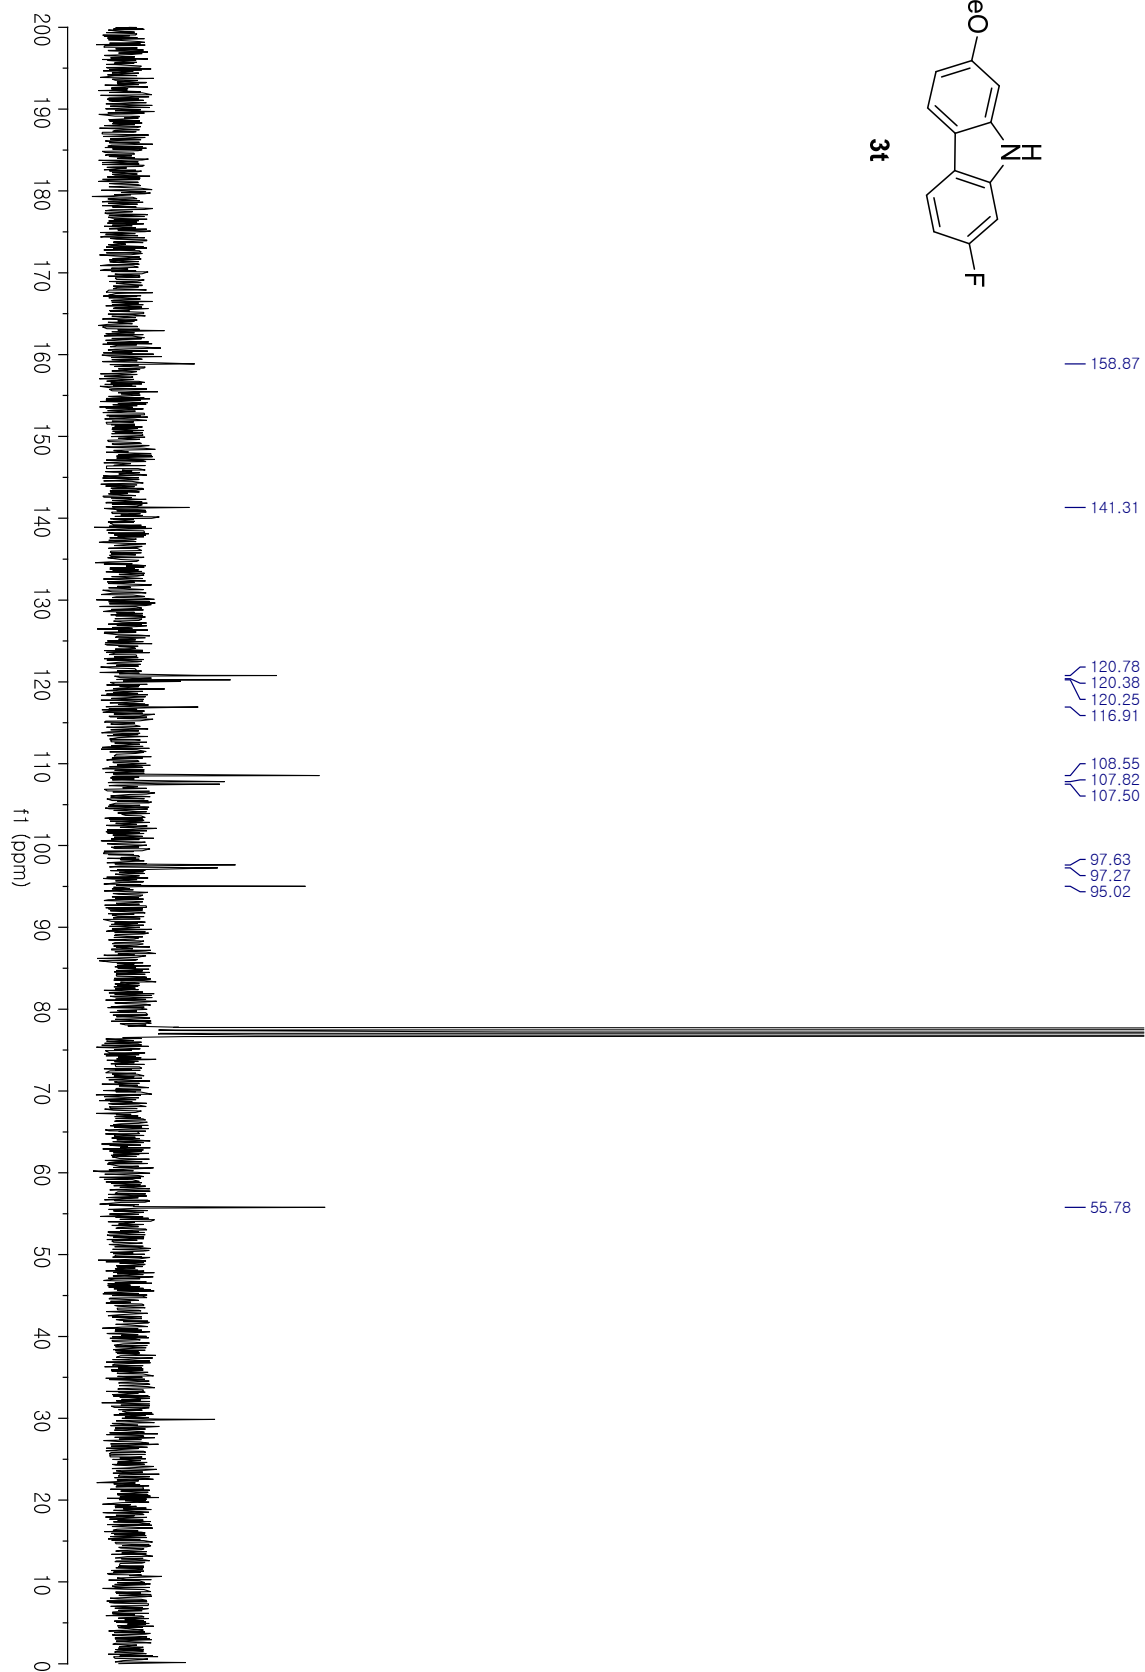

### 10-Methyl-7H-benzo[c]carbazole (3u)

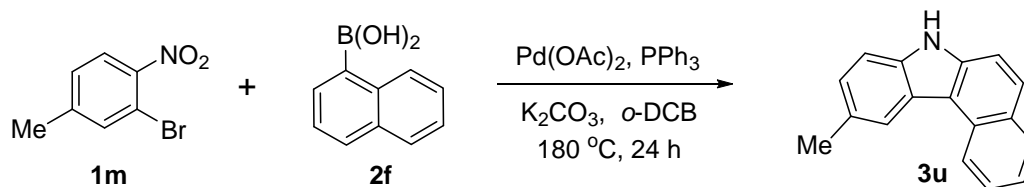

To a re-sealable pressure tube (13 x 100 mm) equipped with magnetic stir bar were added 2-bromo-4-methyl-1-nitrobenzene **1m** (108 mg, 0.5 mmol, 100 mol%), naphthalen-1-ylboronic acid **2f** (112 mg, 0.65 mmol, 130 mol%),  $\text{Pd}(\text{OAc})_2$  (2.2 mg, 0.01 mmol, 2 mol%),  $\text{PPh}_3$  (328 mg, 1.25 mmol, 250 mol %),  $\text{K}_2\text{CO}_3$  (138 mg, 1 mmol, 200 mol%) and *o*-DCB (1 mL, 0.5 M concentration with respect to 2-bromo-4-methyl-1-nitrobenzene **1m**). The mixture was heated at  $180\text{ }^\circ\text{C}$  (oil bath temperature) for 24 hr, at which point the reaction mixture was allowed to cool to ambient temperature. The reaction mixture was filtered through a pad of celite and the resulting liquor was concentrated *in vacuo* and purified by flash column chromatography ( $\text{SiO}_2$ ) using 5% acetone in hexanes as eluant to give **3u** as a white solid (81 mg, 70% yield).  $^1\text{H}$  and  $^{13}\text{C}$  NMR data were consistent with literature values.<sup>16</sup>

**TLC** ( $\text{SiO}_2$ ):  $R_f = 0.34$  (acetone:hexanes, 1:5).

**$^1\text{H}$  NMR** (300 MHz,  $\text{CDCl}_3$ )  $\delta$  8.79 (d,  $J = 8.3\text{ Hz}$ , 1H), 8.37 (s, 1H), 8.31 (s, 1H), 8.01 (d,  $J = 8.1\text{ Hz}$ , 1H), 7.84 (d,  $J = 8.8\text{ Hz}$ , 1H), 7.72 (t,  $J = 7.6\text{ Hz}$ , 1H), 7.59 (d,  $J = 8.8\text{ Hz}$ , 1H), 7.52 – 7.44 (m, 2H), 7.29 (d,  $J = 8.4\text{ Hz}$ , 1H), 2.64 (s, 3H).

**$^{13}\text{C}$  NMR** (75 MHz,  $\text{CDCl}_3$ ):  $\delta$  137.41, 136.78, 130.09, 129.60, 129.27, 127.27, 126.90, 125.87, 124.27, 123.39, 122.98, 122.06, 115.22, 112.79, 110.88, 21.96.

**FTIR** (neat)  $\nu$  3470, 2897, 1696, 1542, 1267, 1152  $\text{cm}^{-1}$ .

**LRMS**  $m/z$  (EI): 232.7 ( $\text{M}^+ + 1$ ), 231.2, 230.2, 228.8, 197.2, 118.8.

(16) B.-Y. Lim, M.-K. Choi and C.-G. Cho, *Tetrahedron Lett.*, 2011, **52**, 6015-6017.

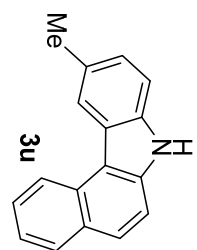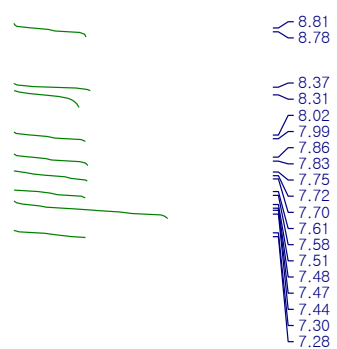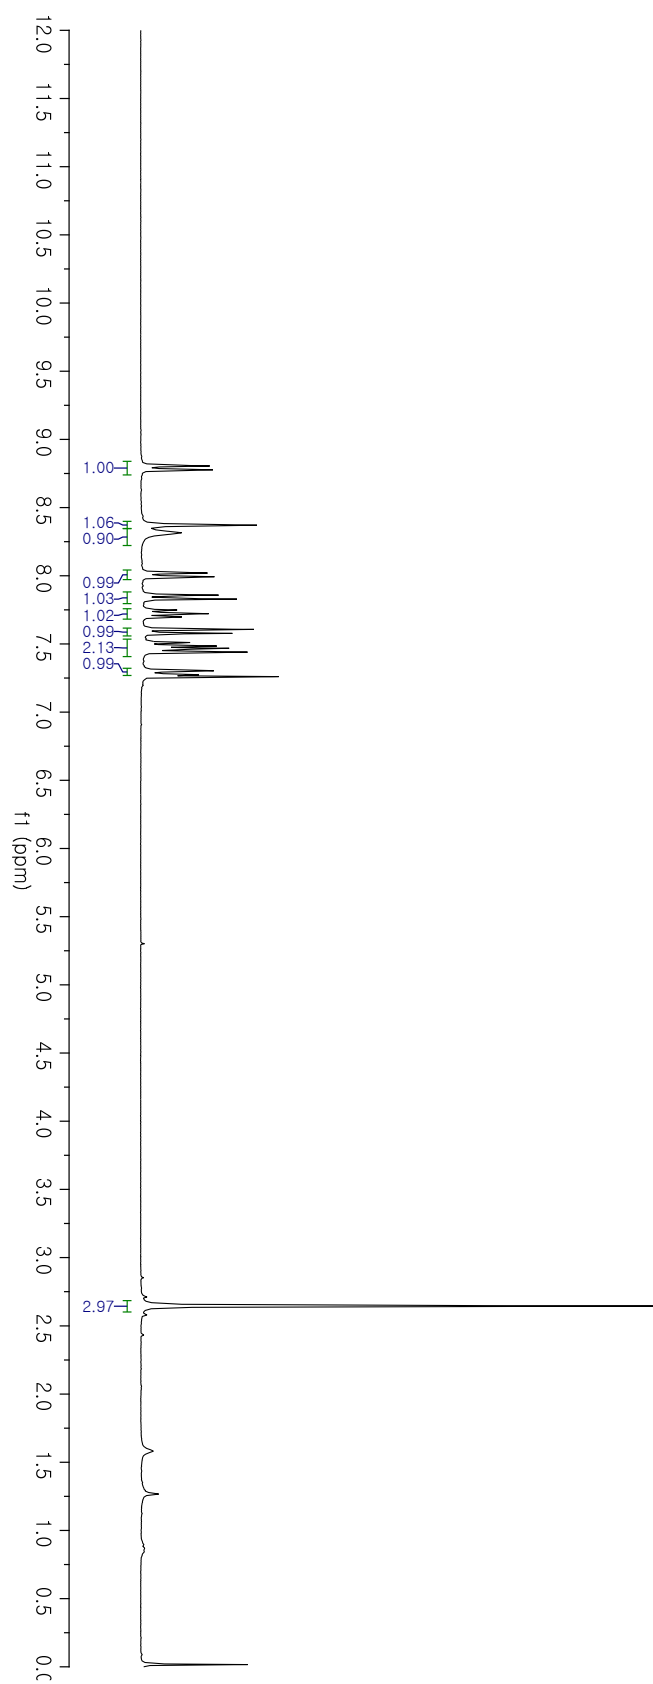

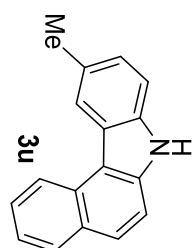

137.41  
136.78  
130.09  
129.60  
129.27  
127.27  
126.90  
125.87  
123.39  
122.98  
122.06  
115.22  
112.79  
110.88

21.96

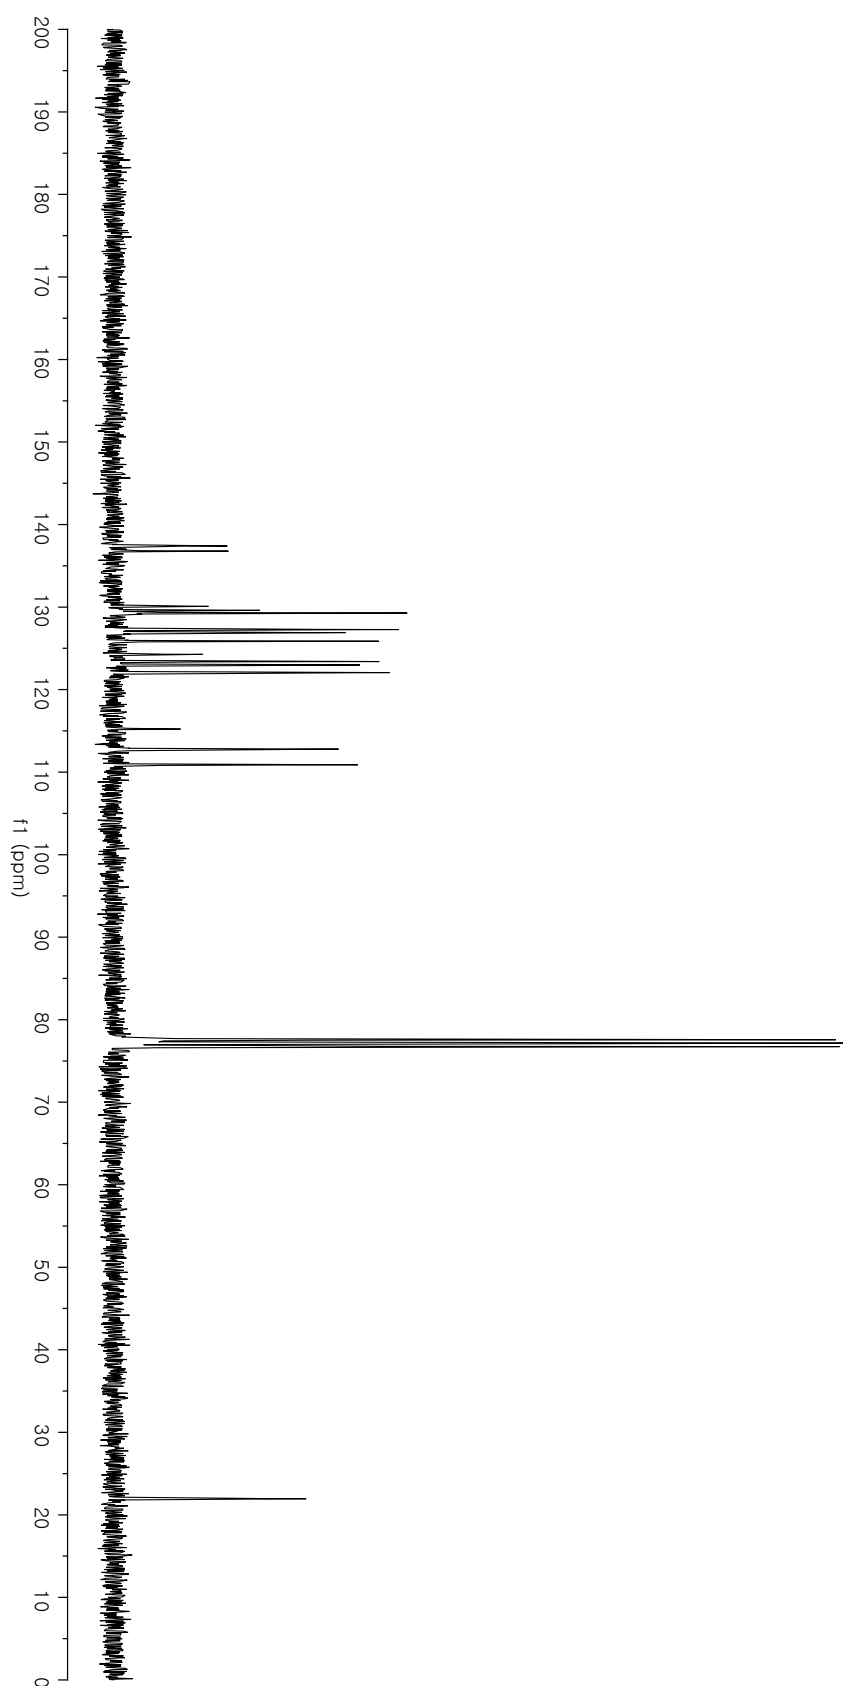

### **2-(Tert-butyl)-7-fluoro-9H-carbazole (3v)**

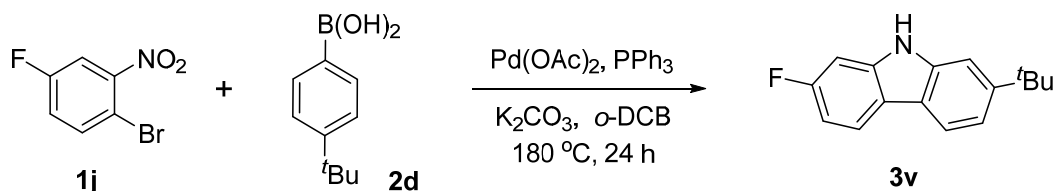

To a re-sealable pressure tube (13 x 100 mm) equipped with magnetic stir bar were added 1-bromo-4-fluoro-2-nitrobenzene **1j** (110 mg, 0.5 mmol, 100 mol%), (4-(tert-butyl)phenyl)boronic acid **2d** (116 mg, 0.65 mmol, 130 mol%), Pd(OAc)<sub>2</sub> (2.2 mg, 0.01 mmol, 2 mol%), PPh<sub>3</sub> (328 mg, 1.25 mmol, 250 mol %), K<sub>2</sub>CO<sub>3</sub> (138 mg, 1 mmol, 200 mol%) and *o*-DCB (1 mL, 0.5 M concentration with respect to 1-bromo-4-fluoro-2-nitrobenzene **1j**). The mixture was heated at 180 °C (oil bath temperature) for 24 hr, at which point the reaction mixture was allowed to cool to ambient temperature. The reaction mixture was filtered through a pad of celite and the resulting liquor was concentrated *in vacuo* and purified by flash column chromatography (SiO<sub>2</sub>) using 5% acetone in hexanes as eluant to give **3v** as a yellow solid (64 mg, 53% yield).

**TLC (SiO<sub>2</sub>)**: R<sub>f</sub> = 0.36 (acetone:hexanes, 1:5).

**<sup>1</sup>H NMR** (300 MHz, DMSO) δ 11.24 (s, 1H), 8.04 (dd, *J* = 8.5, 5.7 Hz, 1H), 7.97 (d, *J* = 8.3 Hz, 1H), 7.43 (s, 1H), 7.23 (dd, *J* = 10.3, 2.1 Hz, 2H), 6.99 – 6.91 (m, 1H), 1.36 (s, 9H).

**<sup>13</sup>C NMR** (75 MHz, DMSO) δ 160.94 (d, *J* = 237.8 Hz), 148.29, 140.61, 140.44, 121.08 (d, *J* = 10.5 Hz), 119.71, 119.50, 119.20, 117.01, 107.26, 106.27 (d, *J* = 24.1 Hz), 97.30 (d, *J* = 26.0 Hz), 34.76, 31.60.

**FTIR** (neat) ν 3475, 3187, 1741, 1598, 1266 cm<sup>-1</sup>.

**LRMS** *m/z* (EI): 242.1 (M<sup>+</sup>+1), 241.1, 227.4, 226.5, 198.2.

**HRMS** *m/z* (EI): calcd. For C<sub>16</sub>H<sub>16</sub>FN (M<sup>+</sup>) 241.1268, found 241.1267.

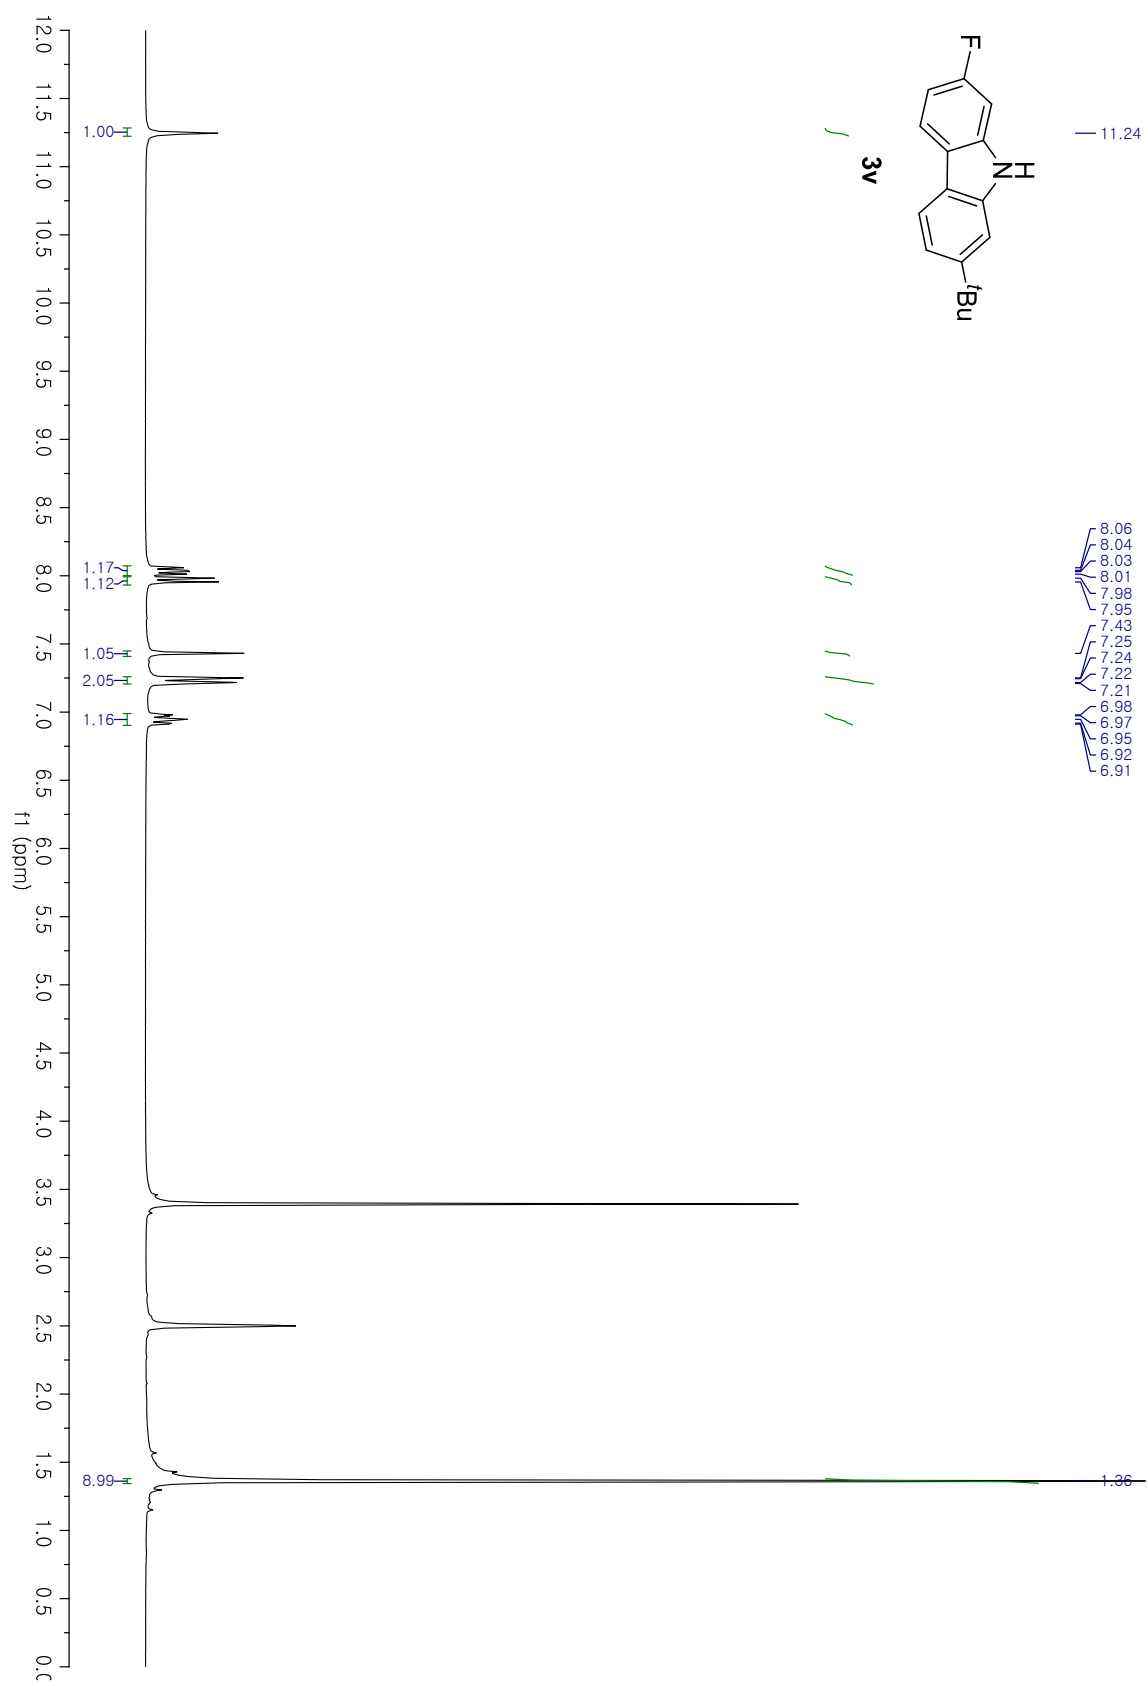

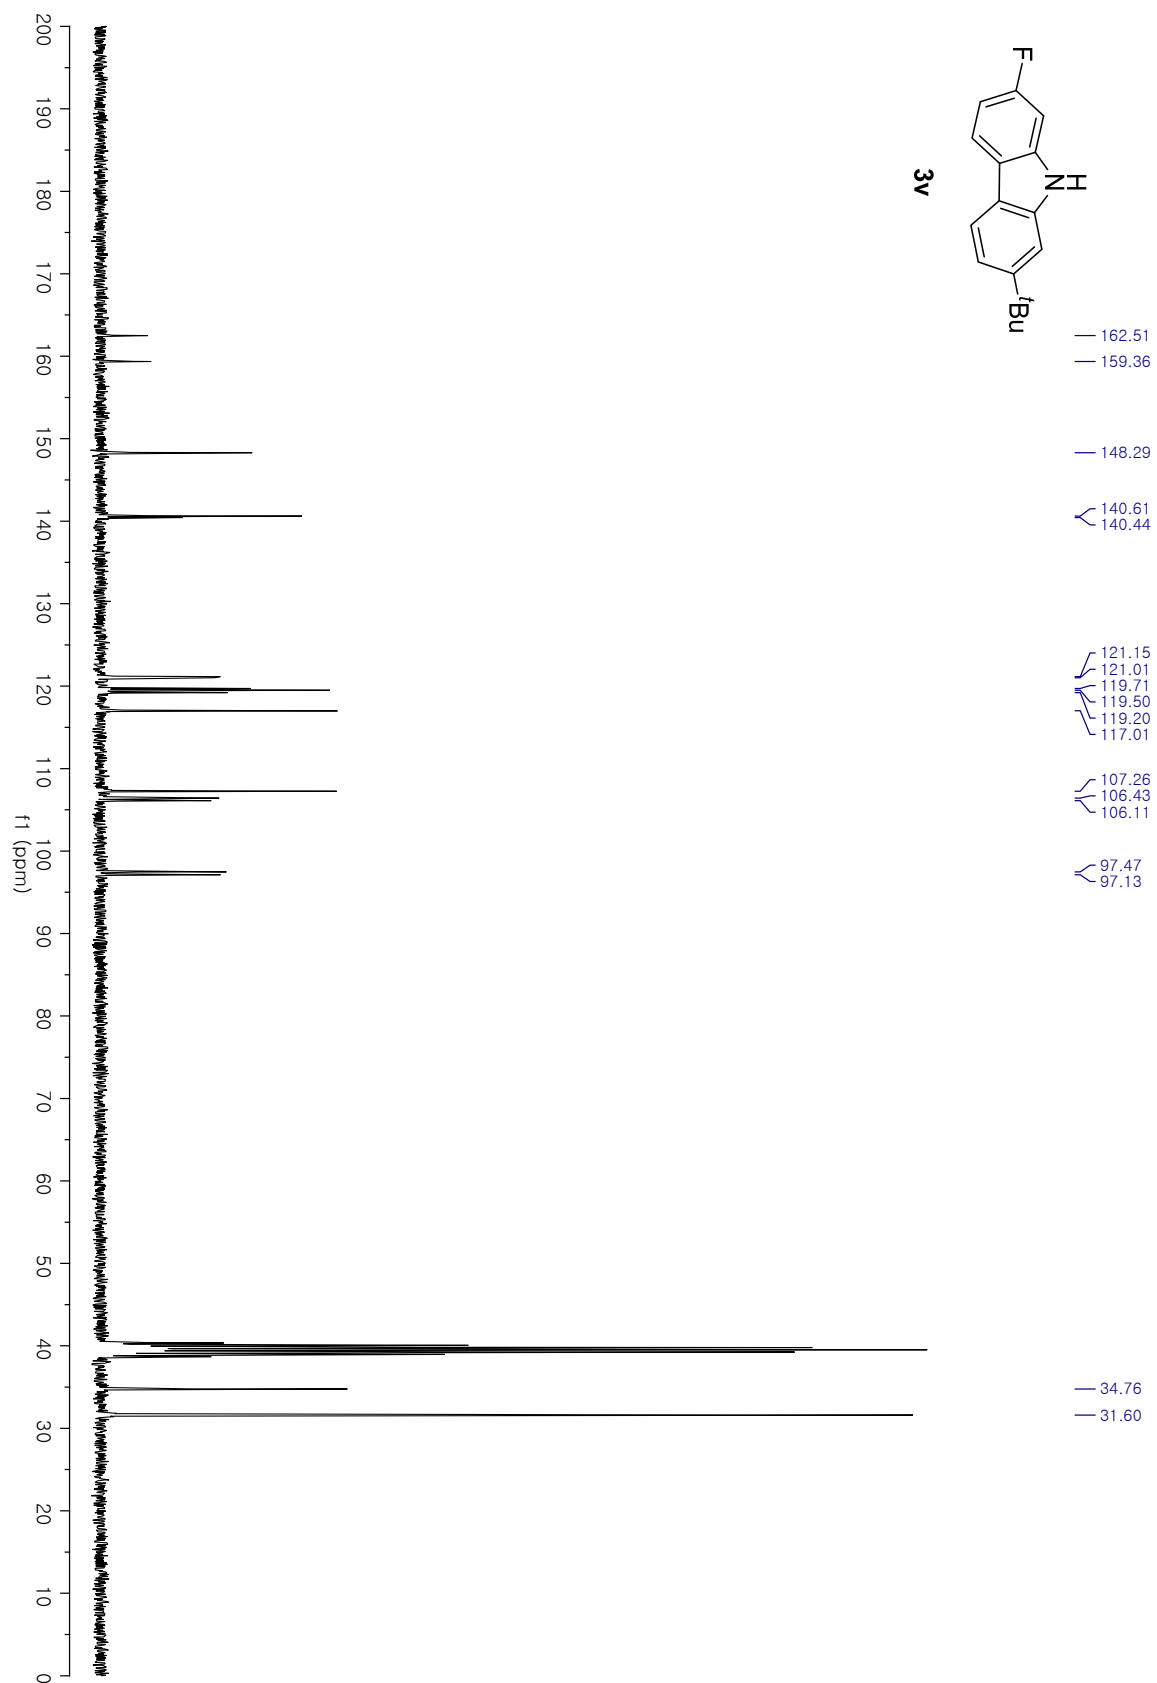



### Glycozoline (3w) and Glycozolicine (3w')

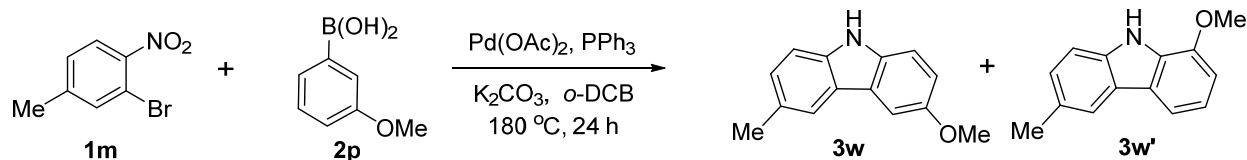

To a re-sealable pressure tube (13 x 100 mm) equipped with magnetic stir bar were added 2-bromo-4-methyl-1-nitrobenzene **1m** (108 mg, 0.5 mmol, 100 mol%), (3-methoxyphenyl)boronic acid **2p** (100 mg, 0.65 mmol, 130 mol%),  $\text{Pd}(\text{OAc})_2$  (2.2 mg, 0.01 mmol, 2 mol%),  $\text{PPh}_3$  (328 mg, 1.25 mmol, 250 mol %),  $\text{K}_2\text{CO}_3$  (138 mg, 1 mmol, 200 mol%) and *o*-DCB (1 mL, 0.5 M concentration with respect to 2-bromo-4-methyl-1-nitrobenzene **1m**). The mixture was heated at  $180\text{ }^\circ\text{C}$  (oil bath temperature) for 24 hr, at which point the reaction mixture was allowed to cool to ambient temperature. The reaction mixture was filtered through a pad of celite and the resulting liquor was concentrated *in vacuo* and purified by flash column chromatography ( $\text{SiO}_2$ ) using 5% acetone in hexanes as eluant to give **3w** as a green solid (37 mg, 35% yield) and **3w'** as a yellow solid (41 mg, 39% yield).  $^1\text{H}$  and  $^{13}\text{C}$  NMR data were consistent with literature values.<sup>15,17</sup>

### Glycozoline(3w)

**TLC ( $\text{SiO}_2$ ):**  $R_f = 0.32$  (acetone:hexanes, 1:6).

**$^1\text{H}$  NMR** (300 MHz,  $\text{CDCl}_3$ )  $\delta$  7.85 (s, 1H), 7.77 (s, 1H), 7.54 (d,  $J = 2.4\text{ Hz}$ , 1H), 7.31 – 7.21 (m, 3H), 7.06 (dd,  $J = 8.7, 2.5\text{ Hz}$ , 1H), 3.94 (s, 3H), 2.54 (s, 3H).

**$^{13}\text{C}$  NMR** (75 MHz,  $\text{CDCl}_3$ )  $\delta$  153.87, 138.69, 134.89, 128.45, 127.32, 123.76, 123.64, 120.25, 115.01, 111.41, 110.56, 103.23, 56.19, 21.54.

**FTIR** (neat)  $\nu$  3410, 2894, 1706, 1492, 1266, 1131  $\text{cm}^{-1}$ .

**LRMS**  $m/z$  (EI): 212.1 ( $\text{M}^+ + 1$ ), 211.2, 197.2, 196.3, 168.2, 167.2.

(15) T. Pirali, F. Zhang, A. H. Miller, J. L. Head, D. McAusland and M. F. Greaney, *Angew. Chem. Int. Ed.*, 2012, **51**, 1006-1009.

(17) C. Schuster, C. Boerger, K. K. Julich-Gruner, R. Hesse, A. Jaeger, G. Kaufmann, A. W. Schmidt and H.-J. Knoelker, *Eur. J. Org. Chem.*, 2014, 4741-4752.

**Glycozolicine (3w')**

**TLC (SiO<sub>2</sub>)**: R<sub>f</sub> = 0.35 (acetone:hexanes, 1:6).

**<sup>1</sup>H NMR** (300 MHz, CDCl<sub>3</sub>) δ 8.17 (s, 1H), 7.87 (s, 1H), 7.67 (d, *J* = 7.8 Hz, 1H), 7.34 (d, *J* = 8.2 Hz, 1H), 7.24 (d, *J* = 8.2 Hz, 1H), 7.16 (t, *J* = 7.8 Hz, 1H), 6.89 (d, *J* = 7.8 Hz, 1H), 4.00 (s, 3H), 2.54 (s, 3H).

**<sup>13</sup>C NMR** (75 MHz, CDCl<sub>3</sub>) δ 145.79, 137.57, 130.24, 128.76, 127.19, 124.32, 123.96, 120.54, 119.61, 112.94, 110.71, 105.87, 55.59, 21.56.

**FTIR** (neat) ν 3410, 2894, 1706, 1492, 1266, 1131 cm<sup>-1</sup>.

**LRMS** *m/z* (EI): 212.2 (M<sup>+</sup>+1), 211.3, 197.2, 196.3, 169.1, 168.2, 142.1.

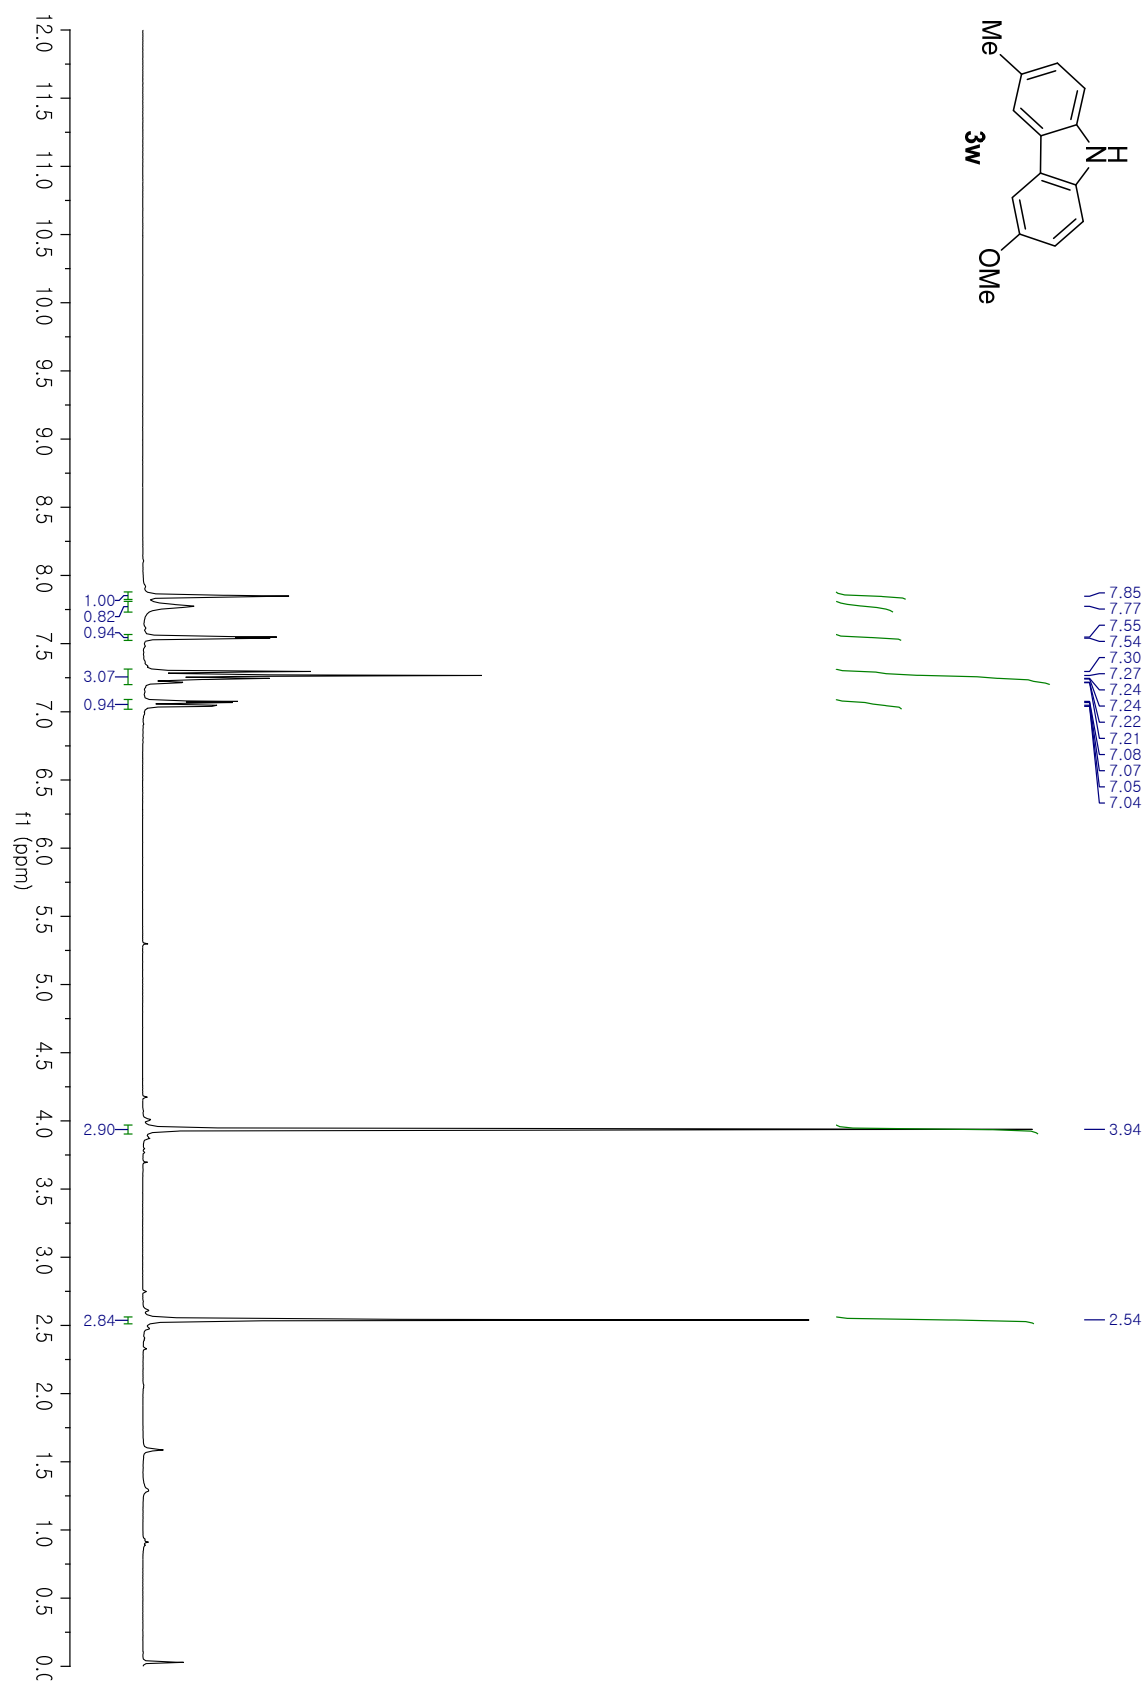

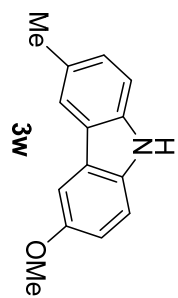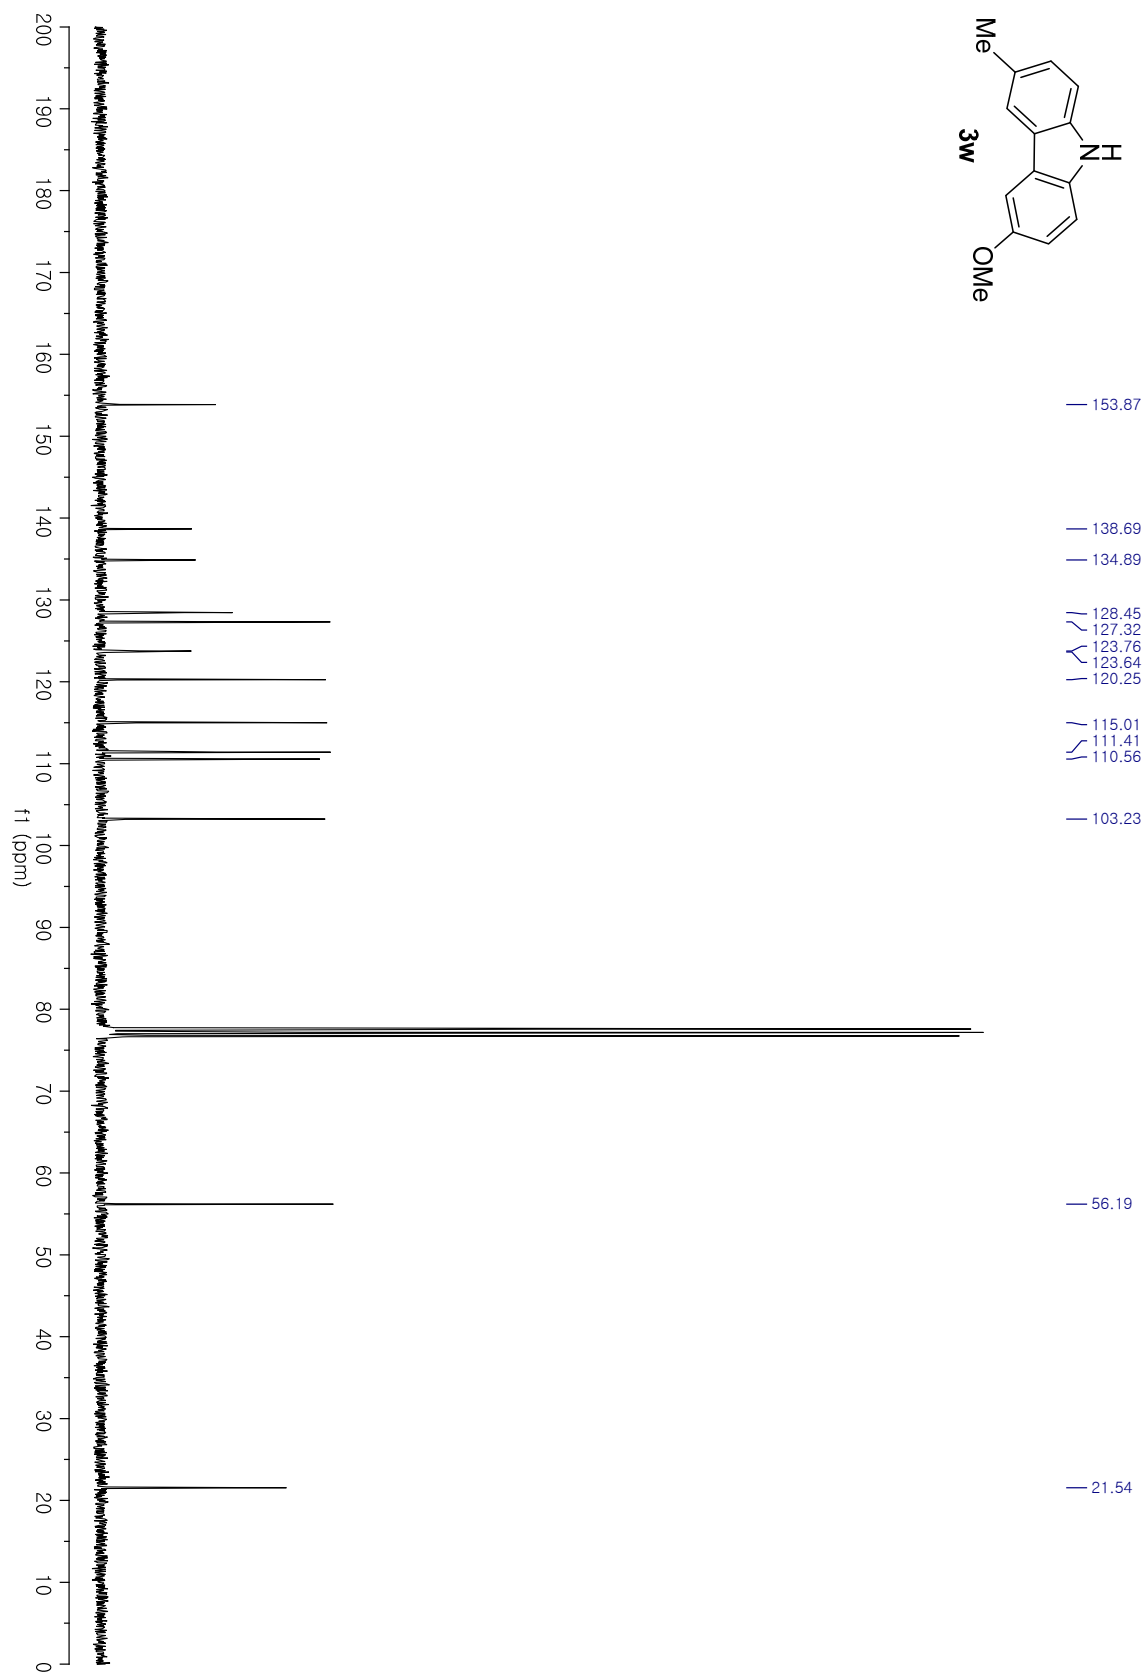

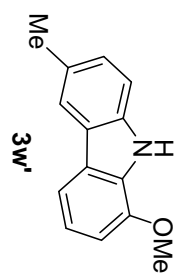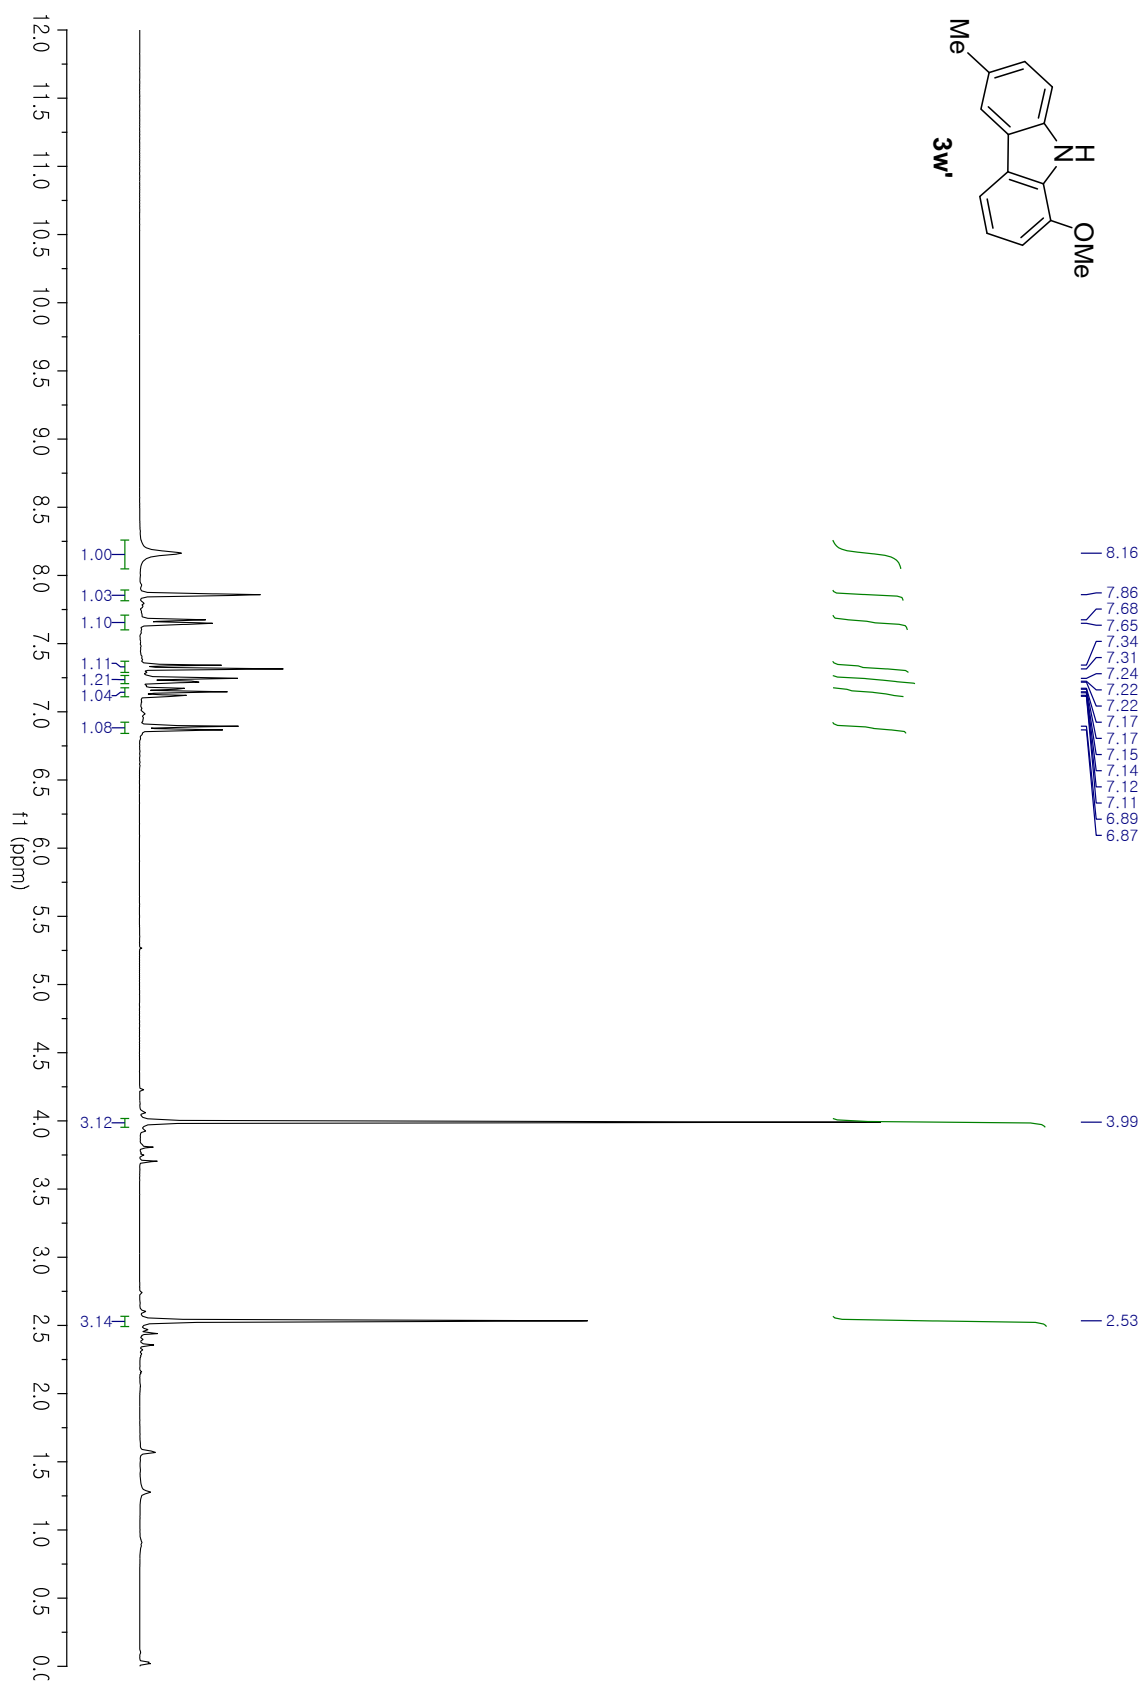

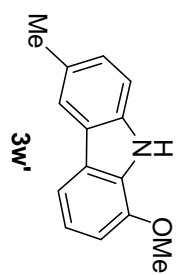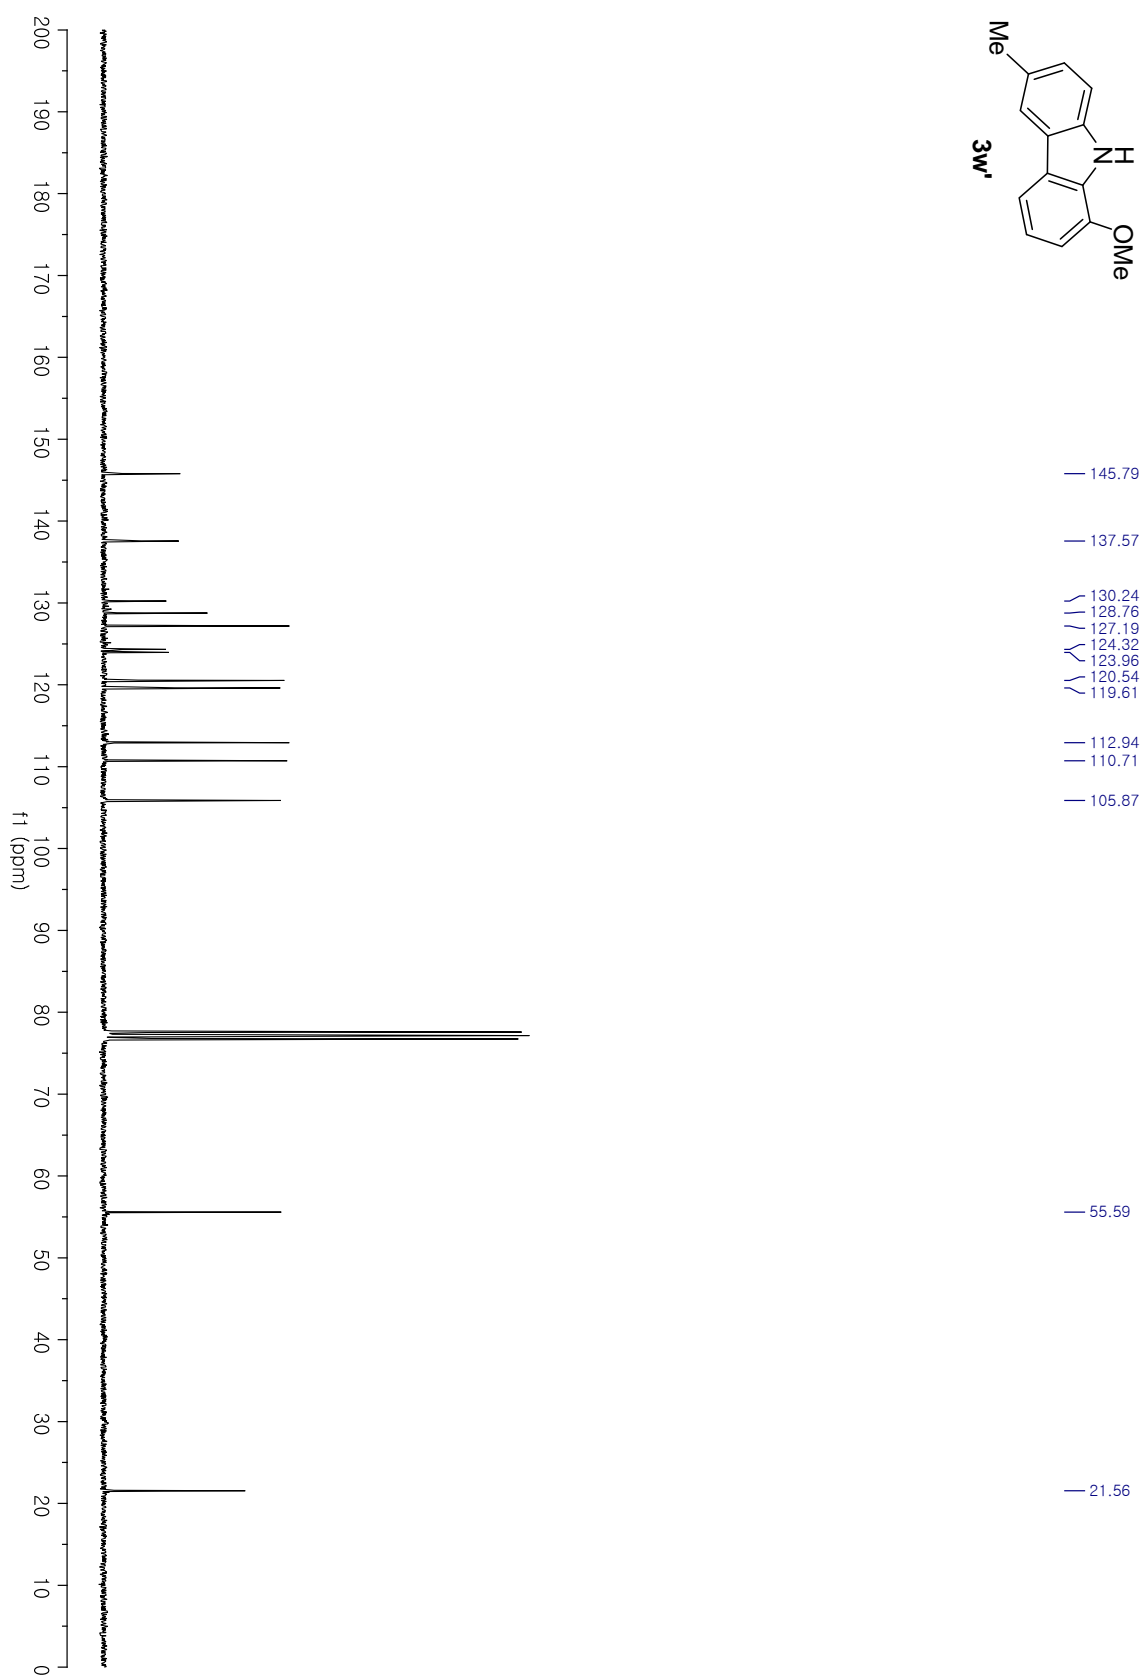

### Glycozolidine (3x) and 2,6-Dimethoxy-1-methyl-9H-carbazole (3x')

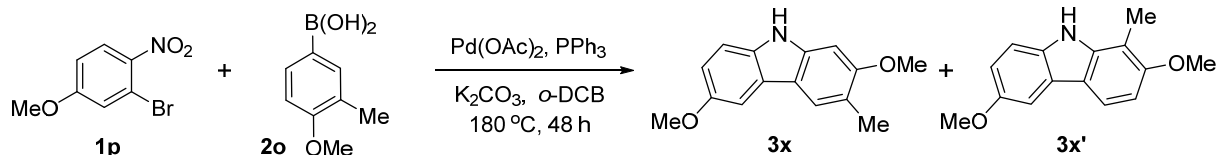

To a re-sealable pressure tube (13 x 100 mm) equipped with magnetic stir bar were added 2-bromo-4-methoxy-1-nitrobenzene **1p** (116 mg, 0.5 mmol, 100 mol%), (4-methoxy-3-methylphenyl)boronic acid **2o** (110 mg, 0.65 mmol, 130 mol%), Pd(OAc) (2.2 mg, 0.01 mmol, 2 mol%), PPh<sub>3</sub> (328 mg, 1.25 mmol, 250 mol %), K<sub>2</sub>CO<sub>3</sub> (138 mg, 1 mmol, 200 mol%) and *o*-DCB (1 mL, 0.5 M concentration with respect to 2-bromo-4-methoxy-1-nitrobenzene **1p**). The mixture was heated at 180 °C (oil bath temperature) for 48 hr, at which point the reaction mixture was allowed to cool to ambient temperature. The reaction mixture was filtered through a pad of celite and the resulting liquor was concentrated *in vacuo* and purified by flash column chromatography (SiO<sub>2</sub>) using 5% acetone in hexanes as eluant to give **3x** as a white solid (56mg, 46% yield) and **3x'** as a white solid (27mg, 22% yield). <sup>1</sup>H and <sup>13</sup>C NMR data were consistent with literature values.<sup>15</sup>

### Glycozolidine (3x)

**TLC (SiO<sub>2</sub>):** R<sub>f</sub> = 0.25 (acetone:hexanes, 1:5).

**<sup>1</sup>H NMR** (300 MHz, CDCl<sub>3</sub>) δ 7.76 (s, 1H), 7.56 (s, 1H), 7.46 (d, *J* = 2.2 Hz, 1H), 7.15 (d, *J* = 8.7 Hz, 1H), 6.96 (dd, *J* = 8.6, 2.3 Hz, 1H), 6.63 (s, 1H), 3.92 (s, 3H), 3.83 (s, 3H), 2.37 (s, 3H).

**<sup>13</sup>C NMR** (75 MHz, CDCl<sub>3</sub>) δ 157.50, 153.90, 140.10, 134.23, 123.96, 121.47, 118.98, 116.17, 113.10, 111.10, 102.53, 92.53, 56.14, 55.52, 16.87.

**FTIR** (neat) ν 3389, 3066, 1787, 1637, 1509, 1365, 1270 cm<sup>-1</sup>.

**LRMS** *m/z* (EI): 242.3 (M<sup>+</sup>+1), 241.3, 227.2, 226.3, 198.2, 183.2, 154.1.

(15) C. Schuster, C. Boerger, K. K. Julich-Gruner, R. Hesse, A. Jaeger, G. Kaufmann, A. W. Schmidt and H.-J. Knoelker, *Eur. J. Org. Chem.*, 2014, 4741-4752.

**2,6-Dimethoxy-1-methyl-9H-carbazole (3x')**

**TLC (SiO<sub>2</sub>)**: R<sub>f</sub> = 0.25 (acetone:hexanes, 1:5).

**<sup>1</sup>H NMR** (300 MHz, DMSO)  $\delta$  10.76 (s, 1H), 7.85 (d,  $J$  = 8.5 Hz, 1H), 7.56 (d,  $J$  = 2.4 Hz, 1H), 7.31 (d,  $J$  = 8.7 Hz, 1H), 6.91 (dd,  $J$  = 8.7, 2.5 Hz, 1H), 6.84 (d,  $J$  = 8.6 Hz, 1H), 3.85 (s, 3H), 3.82 (s, 3H), 2.33 (s, 3H).

**<sup>13</sup>C NMR** (75 MHz, DMSO).  $\delta$  155.44, 153.04, 141.29, 135.08, 123.59, 117.97, 116.79, 113.20, 111.23, 106.54, 103.49, 102.67, 56.08, 55.56, 10.24.

**FTIR** (neat)  $\nu$  3389, 3066, 1787, 1637, 1509, 1365, 1270 cm<sup>-1</sup>.

**LRMS**  $m/z$  (EI): 242.3 (M<sup>+</sup>+1), 241.3, 227.2, 226.3, 198.2, 197.2, 183.2, 154.1.



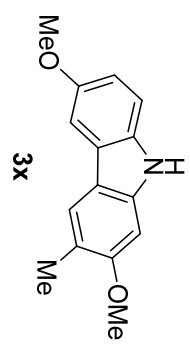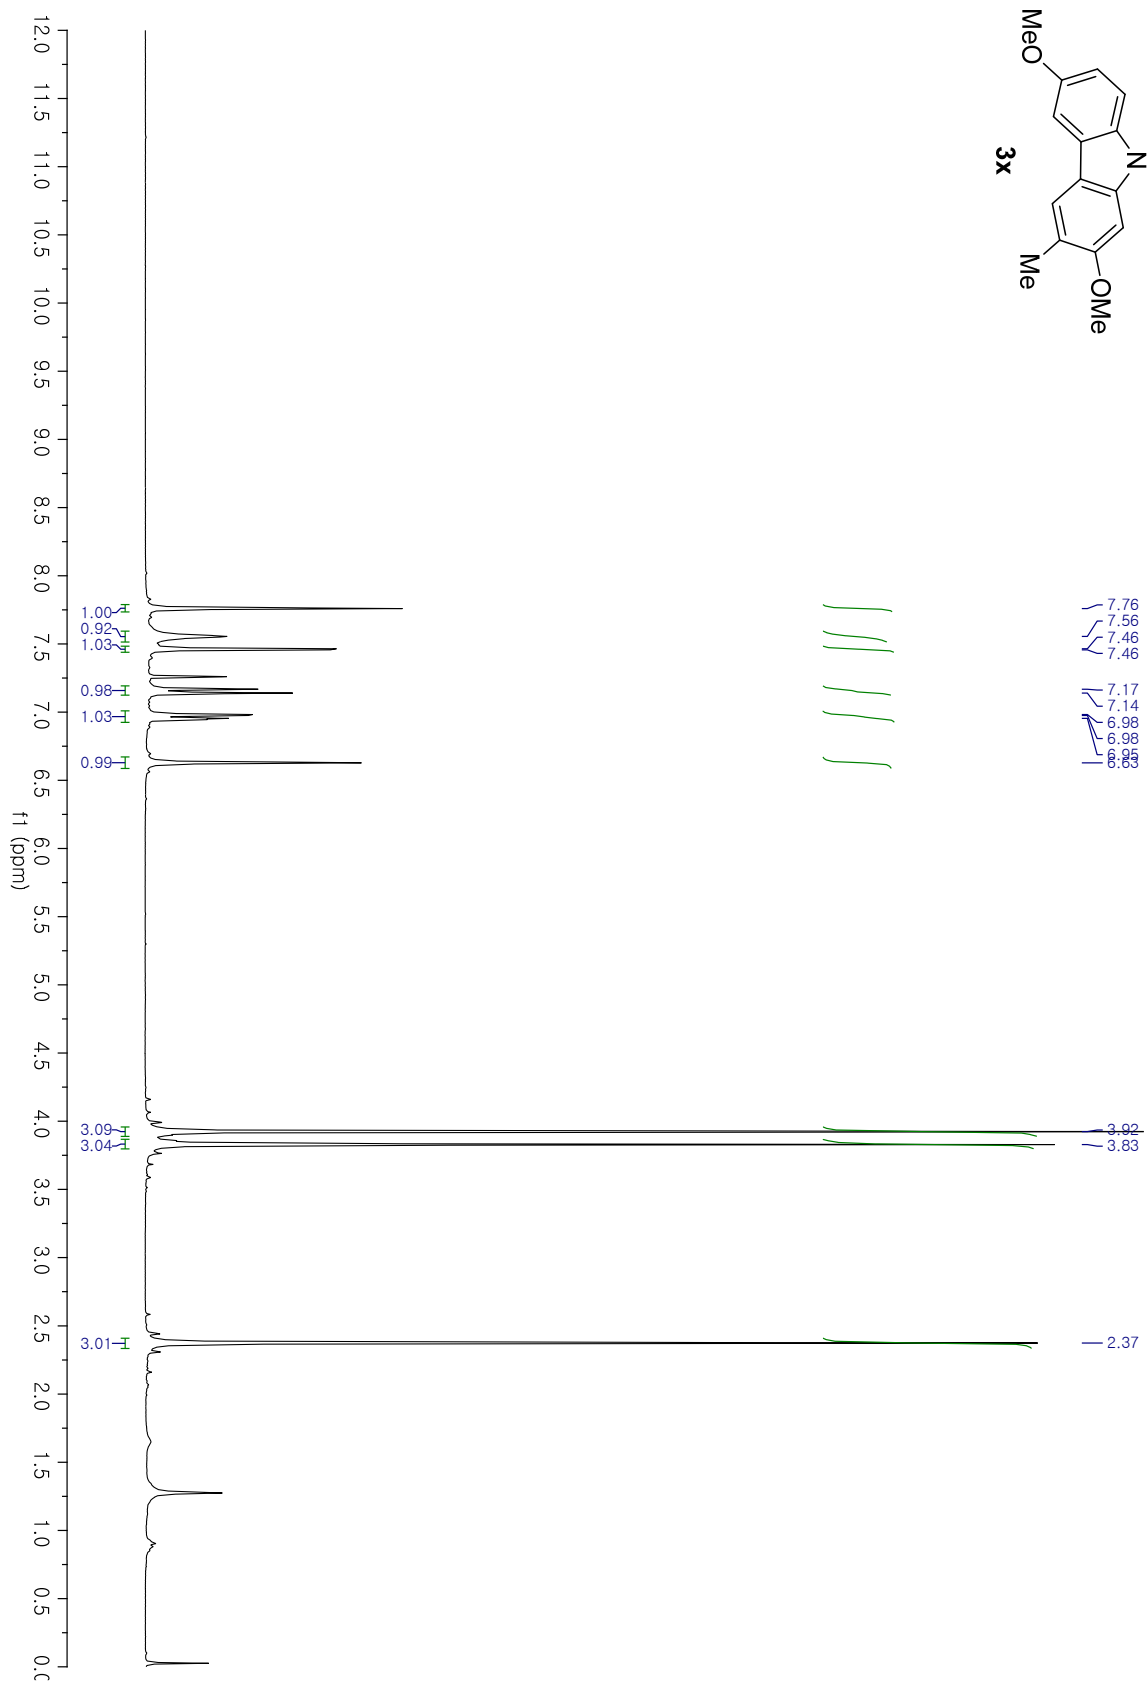

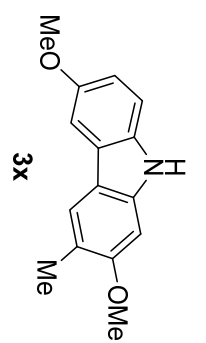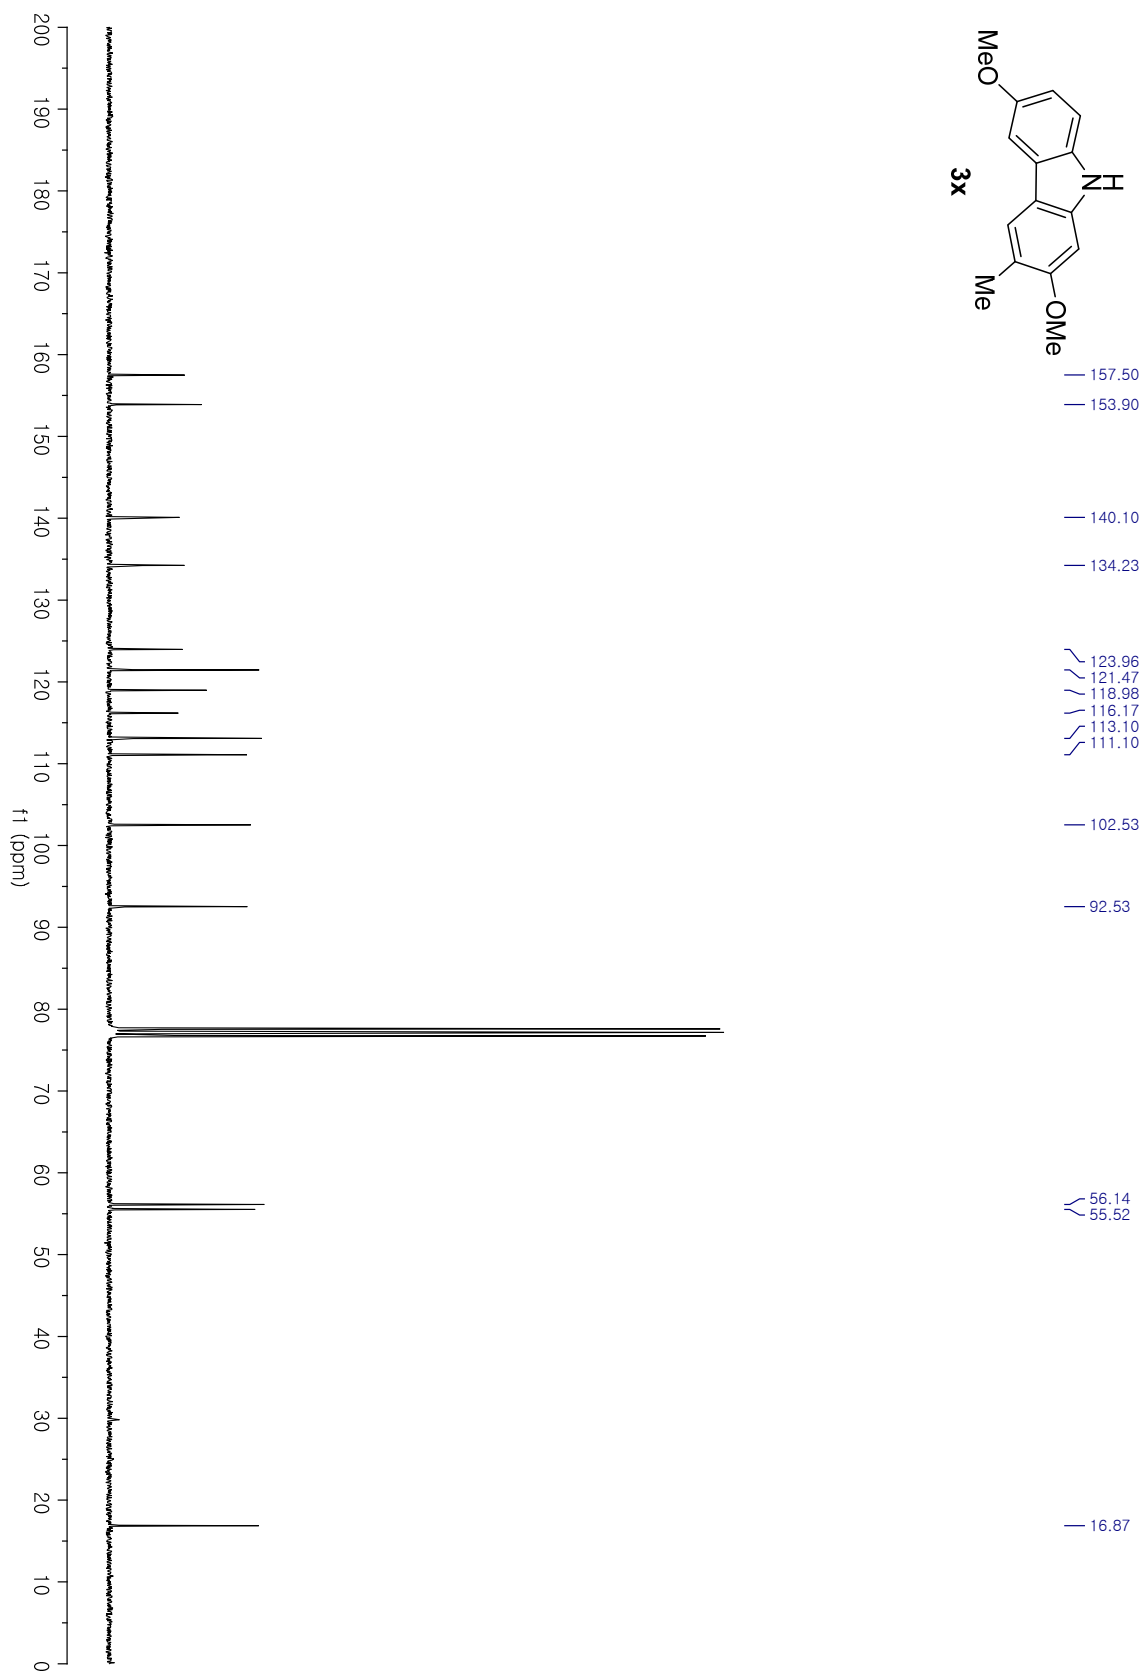

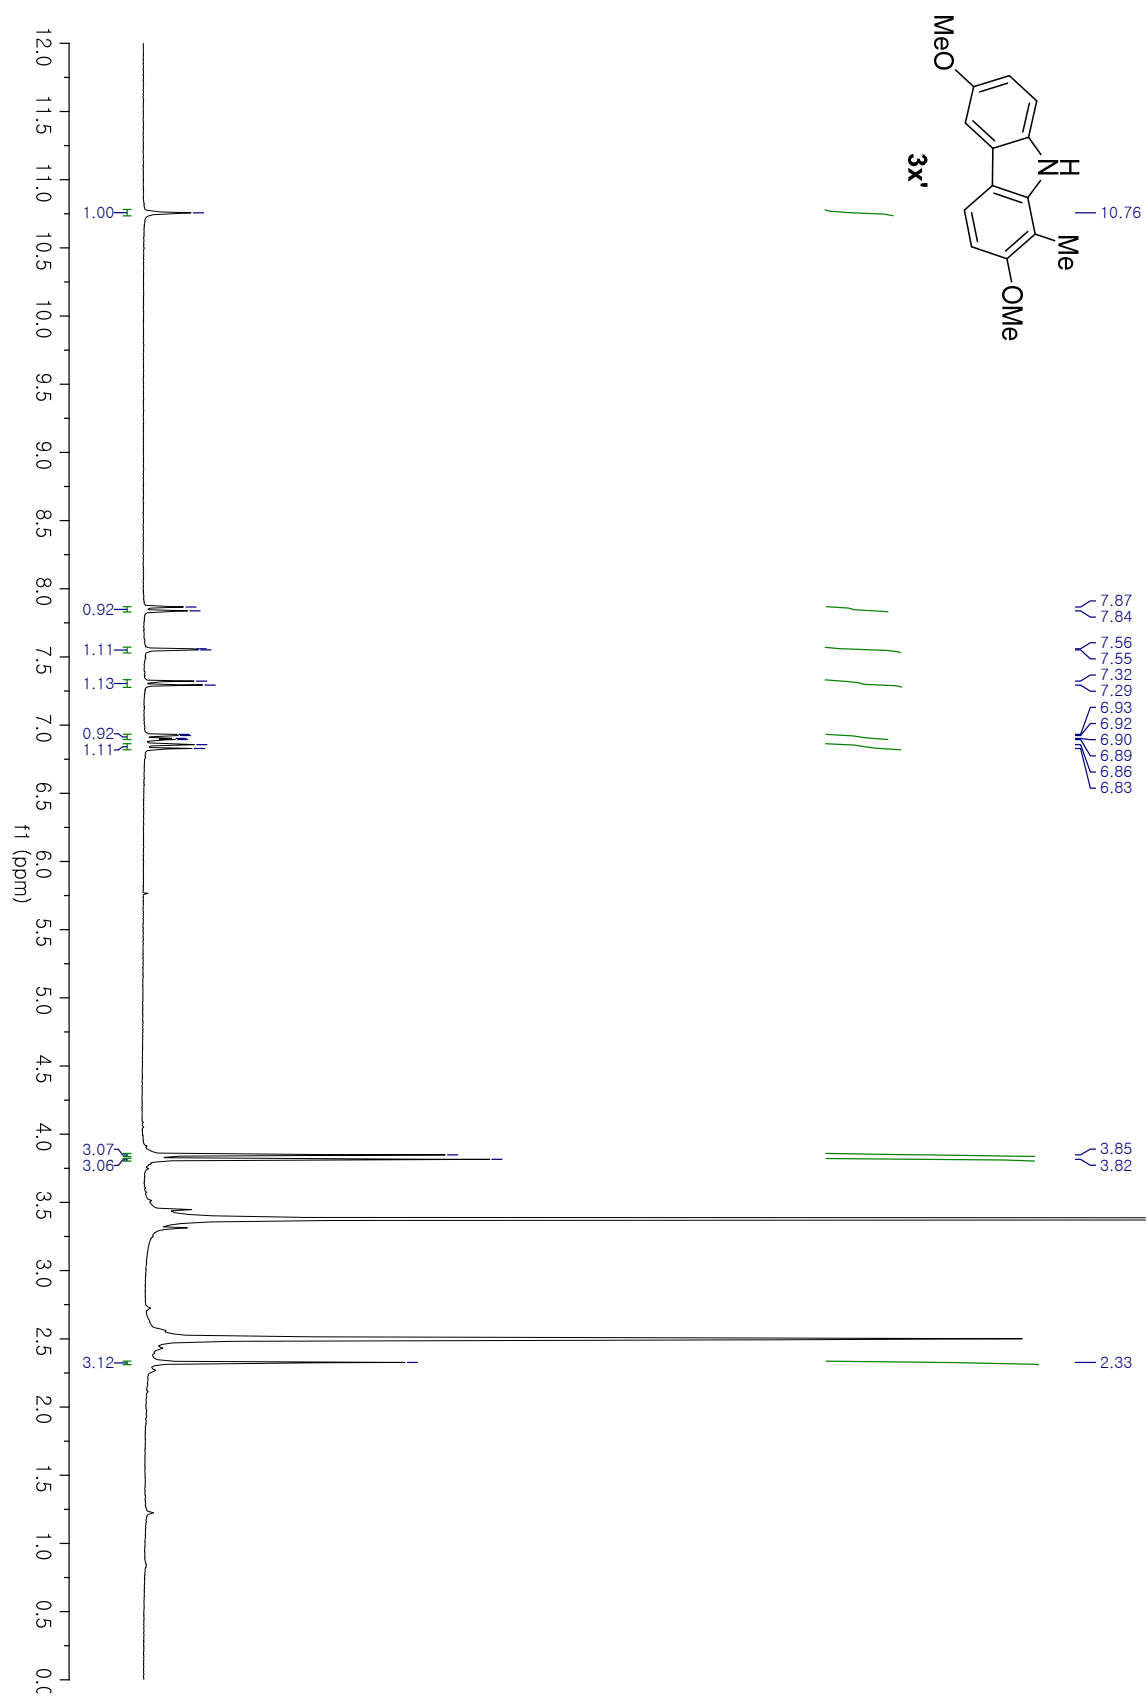

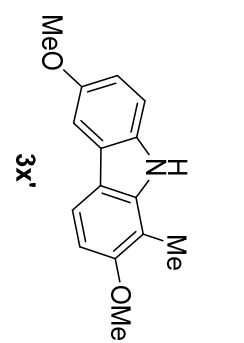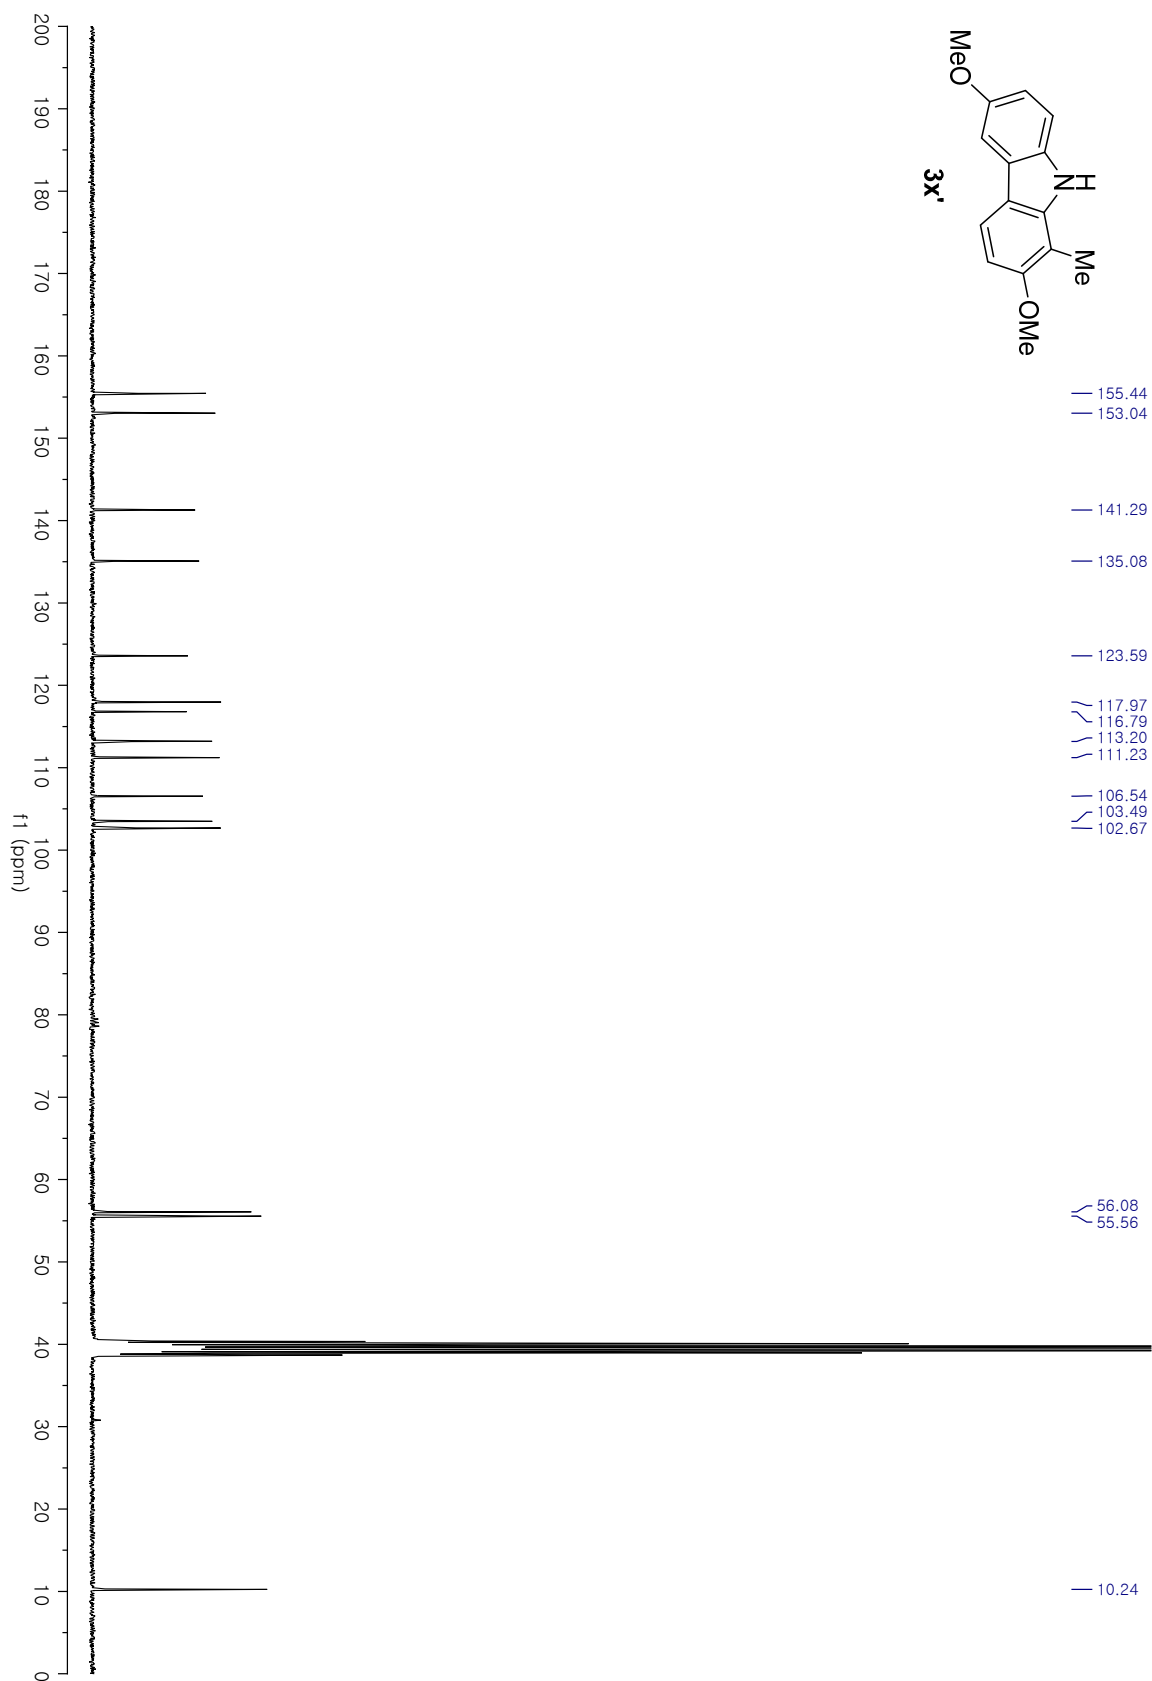

### Calusenalene (3y) and 7-Methyl-10H-[1,3]dioxolo[4,5-a]carbazole (3y')

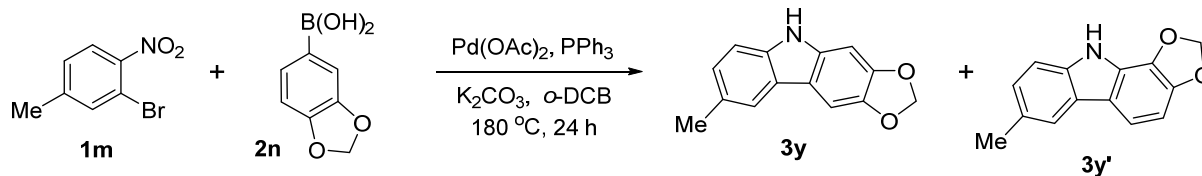

To a re-sealable pressure tube (13 x 100 mm) equipped with magnetic stir bar were added 2-bromo-4-methyl-1-nitrobenzene **1m** (108 mg, 0.5 mmol, 100 mol%), benzo[d][1,3]dioxol-5-ylboronic acid **2n** (110mg, 0.65 mmol, 130 mol%), Pd(OAc) (2.2 mg, 0.01 mmol, 2 mol%), PPh<sub>3</sub> (328 mg, 1.25 mmol, 250 mol %), K<sub>2</sub>CO<sub>3</sub> (138 mg, 1 mmol, 200 mol%) and *o*-DCB (1 mL, 0.5 M concentration with respect to 2-bromo-4-methyl-1-nitrobenzene **1m**). The mixture was heated at 180 °C (oil bath temperature) for 24 hr, at which point the reaction mixture was allowed to cool to ambient temperature. The reaction mixture was filtered through a pad of celite and the resulting liquor was concentrated *in vacuo* and purified by flash column chromatography (SiO<sub>2</sub>) using 5% acetone in hexanes as eluant to give inseparable mixture of **3y** and **3y'** as a white solid (61 mg, 80% yield, **3y**:**3y'**=5.3:1 (determined by <sup>1</sup>H NMR and GC-Mass spectrometer)). Calusenalene (**3y**) can be separable by recrystallization from dichloromethane and hexanes. <sup>1</sup>H and <sup>13</sup>C NMR data were consistent with literature values.<sup>18</sup>

### Calusenalene (3y)

**TLC (SiO<sub>2</sub>):** R<sub>f</sub> = 0.40 (acetone:hexanes, 1:5).

**<sup>1</sup>H NMR** (300 MHz, Acetone) δ 10.09 (s, 1H), 7.76 (s, 1H), 7.50 (s, 1H), 7.31 (d, J = 8.2 Hz, 1H), 7.09 (dd, J = 8.2, 1.2 Hz, 1H), 6.98 (s, 1H), 6.00 (s, 2H), 2.45 (s, 3H).

**<sup>13</sup>C NMR** (75 MHz, Acetone) δ 147.94, 142.82, 139.11, 136.64, 128.26, 126.07, 124.45, 119.77, 116.76, 111.26, 101.66, 99.82, 92.85, 21.48.

**FTIR** (neat) : ν 3400, 3009, 1728, 1366, 1219, 1093, 533 cm<sup>-1</sup>.

**LRMS** *m/z* (EI): 225.9 (M<sup>+</sup>+1), 225.2.

(18) S. Rasheed, D. N. Rao, K. R. Reddy, S. Aravinda, R. A. Vishwakarma and P. Das, *RSC Adv.*, 2014, **4**, 4960-4969.

**7-Methyl-10H-[1,3]dioxolo[4,5-a]carbazole (3y')**

**TLC (SiO<sub>2</sub>)**: R<sub>f</sub> = 0.40 (acetone:hexanes, 1:5).

**<sup>1</sup>H NMR** (300 MHz, Acetone) δ 10.17 (s, 1H), 7.81 (s, J = 0.6 Hz, 2H), 7.61 – 7.57 (m, 1H), 7.36 (d, J = 8.2 Hz, 1H), 7.17 (dd, J = 8.2, 1.2 Hz, 1H), 6.80 (d, J = 8.2 Hz, 1H), 6.07 (s, 2H), 2.46 (s, 3H).

**FTIR** (neat) : ν 3400, 3009, 1728, 1366, 1219, 1093, 533 cm<sup>-1</sup>.

**LRMS** m/z (EI): 225.9 (M<sup>+</sup>+1), 225.2.

**GC**: (Varian 450-GC, SPB<sup>TM</sup>-680 (30 m x 0.25 mm x 0.25 μm), T<sub>0</sub> : 60 °C (hold 4 min), T<sub>1</sub> : Ramp, 250 °C at 10 °C/min, Carrier: He (1.0 mL/min), Total time 60 min), t<sub>3y'</sub> = 26.98 min, t<sub>3y</sub> = 28.69 min, Ratio (**3y:3y'** = 5.3:1).

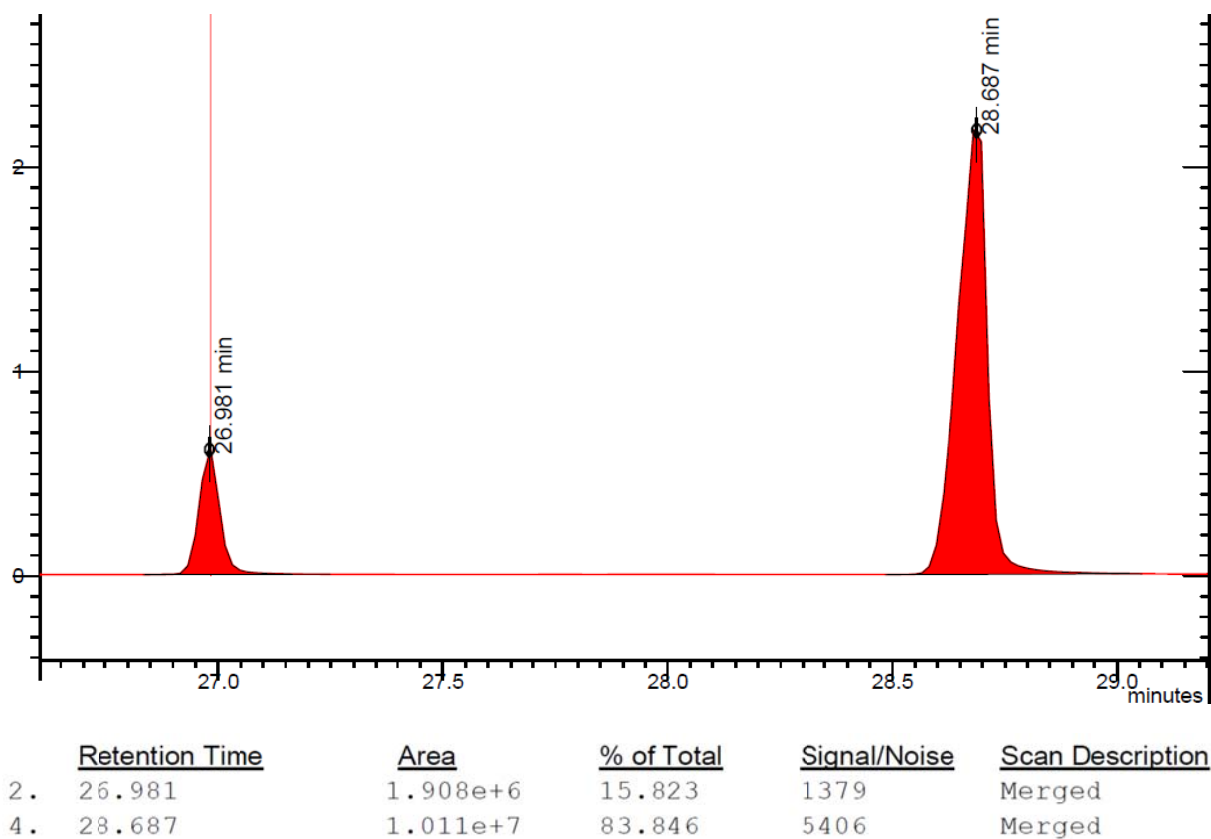

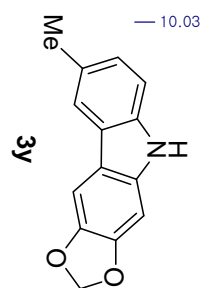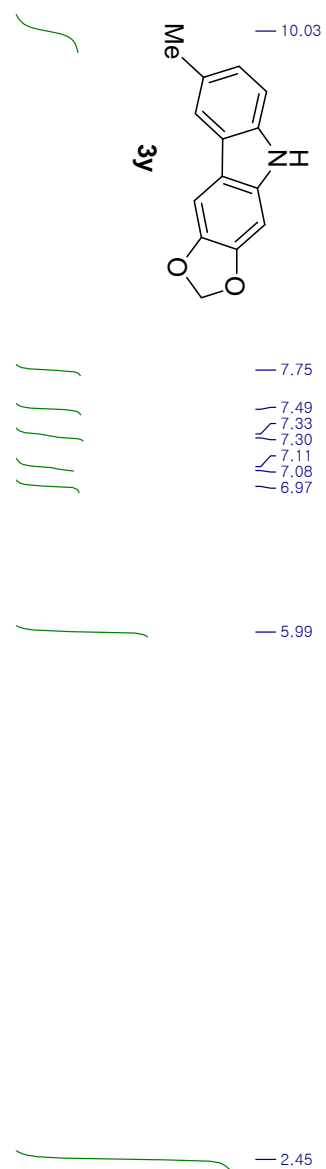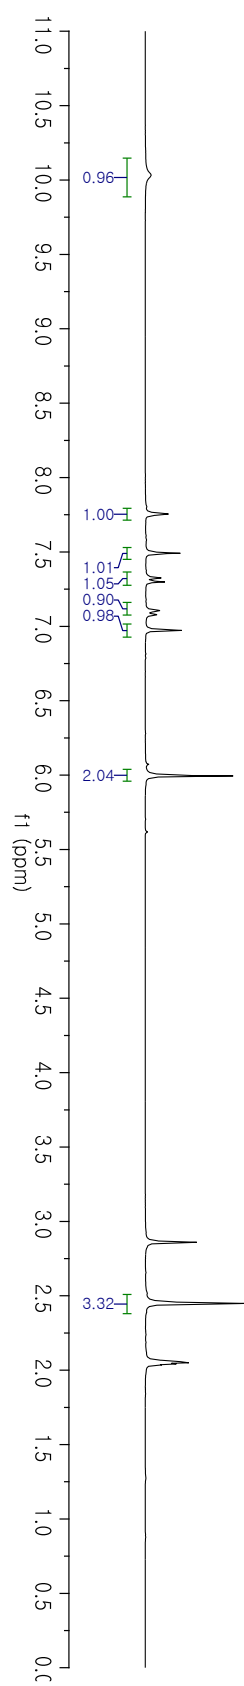

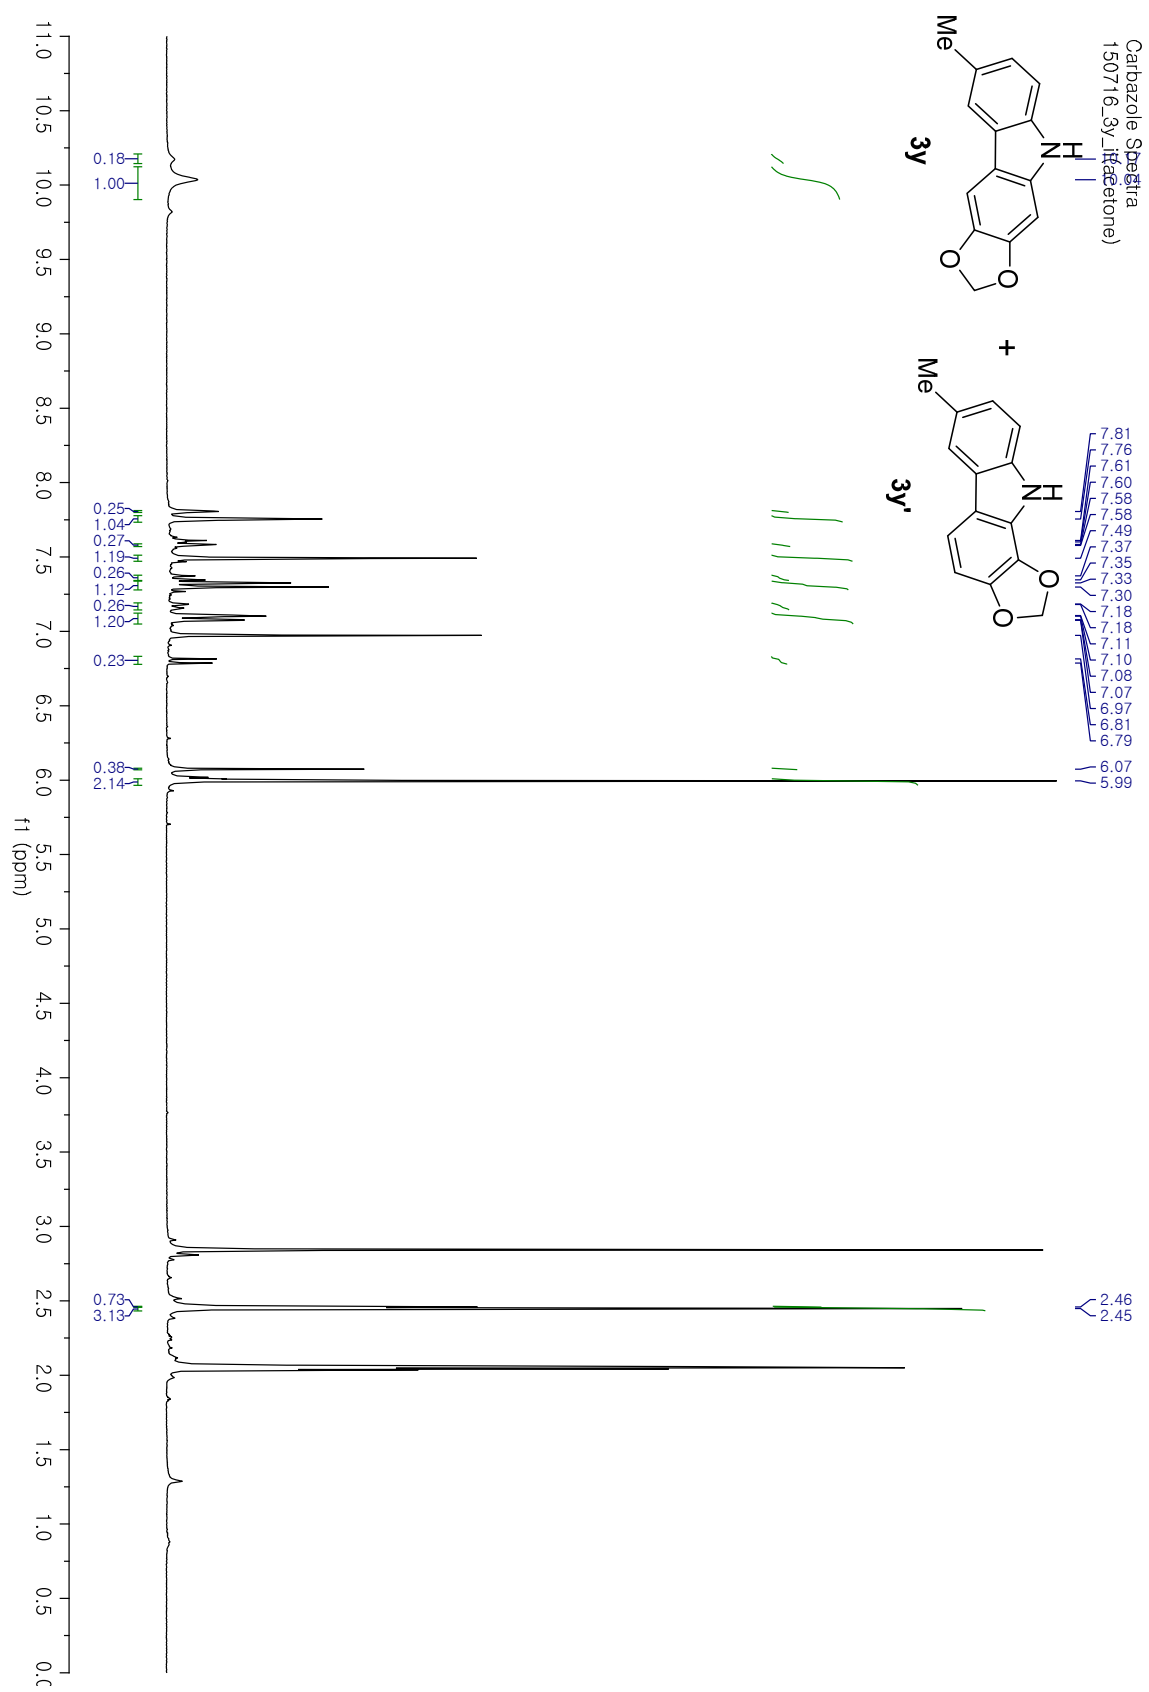



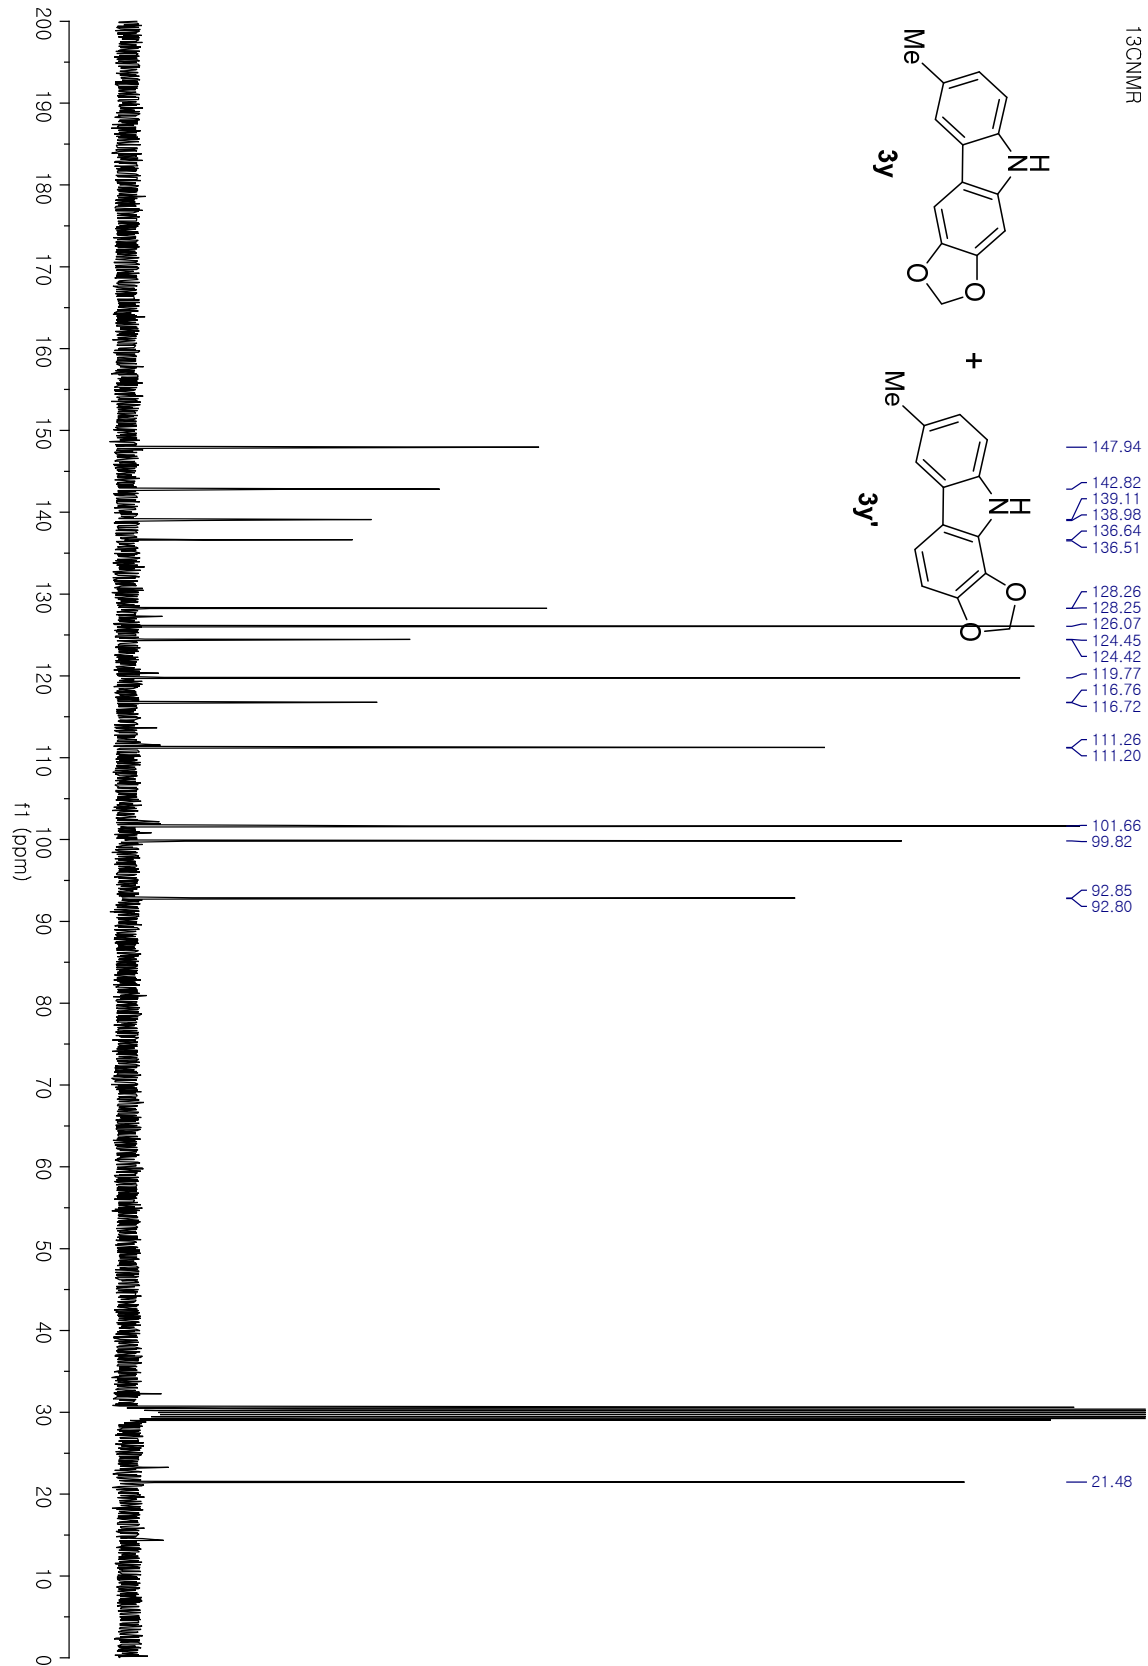

### General Procedure for Suzuki coupling of 3-chlorocarbazole (**3i**)

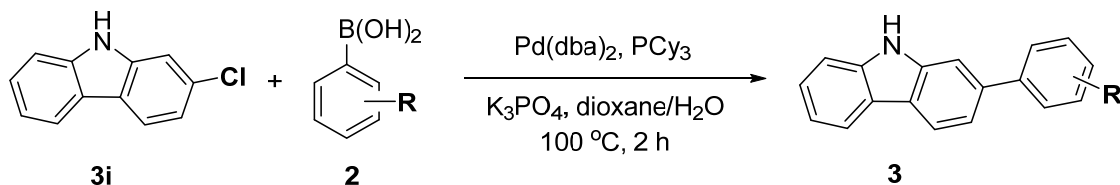

To a re-sealable pressure tube (13 x 100 mm) equipped with magnetic stir bar were 2-chloro-9H-carbazole **3i** (0.1 mmol, 100 mol%), aryl boronic acid **2** (0.15 mmol, 150 mol%),  $\text{Pd}_2(\text{dba})_3$  (0.01 mmol, 10 mol%),  $\text{PCy}_3$  (0.25 mmol, 25 mol %),  $\text{K}_3\text{PO}_4$  (1.27 M in water, 0.34 mmol) and dioxane (2 mL, 0.5 M concentration with respect to 2-chloro-9H-carbazole **3i**). The slurry was sealed and purged with Argon gas for 5 minutes. The mixture was heated at  $100\text{ }^\circ\text{C}$  (oil bath temperature) for 2 hr, at which point the reaction mixture was allowed to cool to ambient temperature. The reaction mixture, treated with saturated sodium bicarbonate solution, and extracted with dichloromethane (3x). The combined organic layers were dried with magnesium sulfate, filtered, and concentrated *in vacuo* and purified by flash column chromatography ( $\text{SiO}_2$ ) and recrystallization from dichloromethane and hexanes under the conditions noted to furnish the corresponding product.

### 2-phenyl-9H-carbazole (3e)

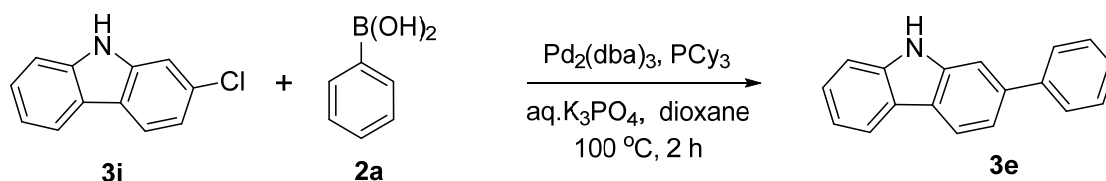

To a re-sealable pressure tube (13 x 100 mm) equipped with magnetic stir bar were 2-chloro-9H-carbazole **3i** (20 mg, 0.1 mmol, 100 mol%), phenylboronic acid **2a** (18.3 mg, 0.15 mmol, 150 mol%),  $\text{Pd}_2(\text{dba})_3$  (9 mg, 0.01 mmol, 10 mol%),  $\text{PCy}_3$  (7 mg, 0.25 mmol, 25 mol %),  $\text{K}_3\text{PO}_4$  (1.27 M in water, 0.27 mL, 0.34 mmol) and dioxane (2 mL, 0.05 M concentration with respect to 2-chloro-9H-carbazole **3i**). The slurry was sealed and purged with Argon gas for 5 minutes. The mixture was heated at  $100^\circ\text{C}$  (oil bath temperature) for 2 hr, at which point the reaction mixture was allowed to cool to ambient temperature. The reaction mixture, treated with saturated sodium bicarbonate solution, and extracted with dichloromethane (3x). The combined organic layers were dried with magnesium sulfate, filtered, and concentrated *in vacuo* and purified by flash column chromatography ( $\text{SiO}_2$ ) using 5% ethyl acetate in hexanes as eluant to give **3e** as a white solid (21.2 mg, 87% yield)

**2-([1,1'-Biphenyl]-4-yl)-9H-carbazole (3ia)**

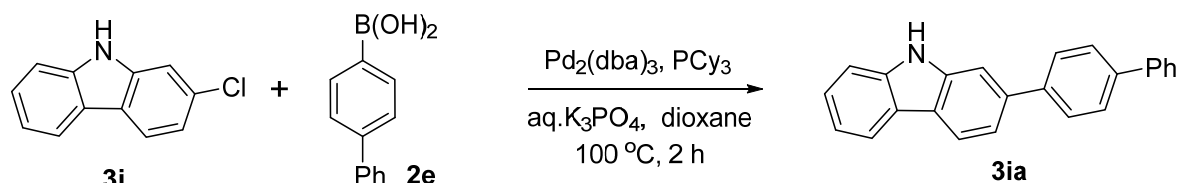

To a re-sealable pressure tube (13 x 100 mm) equipped with magnetic stir bar were 2-chloro-9H-carbazole **3i** (20 mg, 0.1 mmol, 100 mol%), [1,1'-biphenyl]-4-ylboronic acid **2e** (30 mg, 0.15 mmol, 150 mol%),  $\text{Pd}_2(\text{dba})_3$  (9 mg, 0.01 mmol, 10 mol%),  $\text{PCy}_3$  (7 mg, 0.25 mmol, 25 mol %),  $\text{K}_3\text{PO}_4$  (1.27 M in water, 0.27 mL, 0.34 mmol) and dioxane (2 mL, 0.05 M concentration with respect to 2-chloro-9H-carbazole **3i**). The slurry was sealed and purged with Argon gas for 5 minutes. The mixture was heated at  $100\text{ }^\circ\text{C}$  (oil bath temperature) for 2 hr, at which point the reaction mixture was allowed to cool to ambient temperature. The reaction mixture, treated with saturated sodium bicarbonate solution, and extracted with dichloromethane (3x). The combined organic layers were dried with magnesium sulfate, filtered, and concentrated *in vacuo* and purified by recrystallization from dichloromethane and hexanes to give **3ia** as a white solid (23 mg, 72% yield).

**TLC (SiO<sub>2</sub>)**:  $R_f = 0.38$  (ethyl acetate:hexanes, 1:5)

**<sup>1</sup>H NMR** (300 MHz, DMSO) <sup>1</sup>H NMR (300 MHz, DMSO)  $\delta$  11.35 (s, 1H), 8.20 (d,  $J = 8.1$  Hz, 1H), 8.14 (d,  $J = 7.8$  Hz, 1H), 7.86 (d,  $J = 8.1$  Hz, 1H), 7.85 (s, 1H), 7.82 – 7.71 (m, 5H), 7.55 – 7.46 (m, 4H), 7.44 – 7.36 (m, 2H), 7.18 (t,  $J = 7.4$  Hz, 1H).

**<sup>13</sup>C NMR** (75 MHz, DMSO)  $\delta$  140.41, 140.33, 140.20, 139.70, 138.77, 137.20, 129.03, 127.50, 127.21, 126.56, 125.70, 122.19, 121.94, 120.70, 120.30, 118.74, 117.72, 111.03, 108.74.

**FTIR** (neat)  $\nu$  3403, 3101, 1753, 1691, 1530, 1368, 1206, 763  $\text{cm}^{-1}$

**HRMS**  $m/z$  (EI): calcd. For  $\text{C}_{24}\text{H}_{17}\text{N}$  ( $\text{M}^+$ ) 319.1361, found 319.1360.

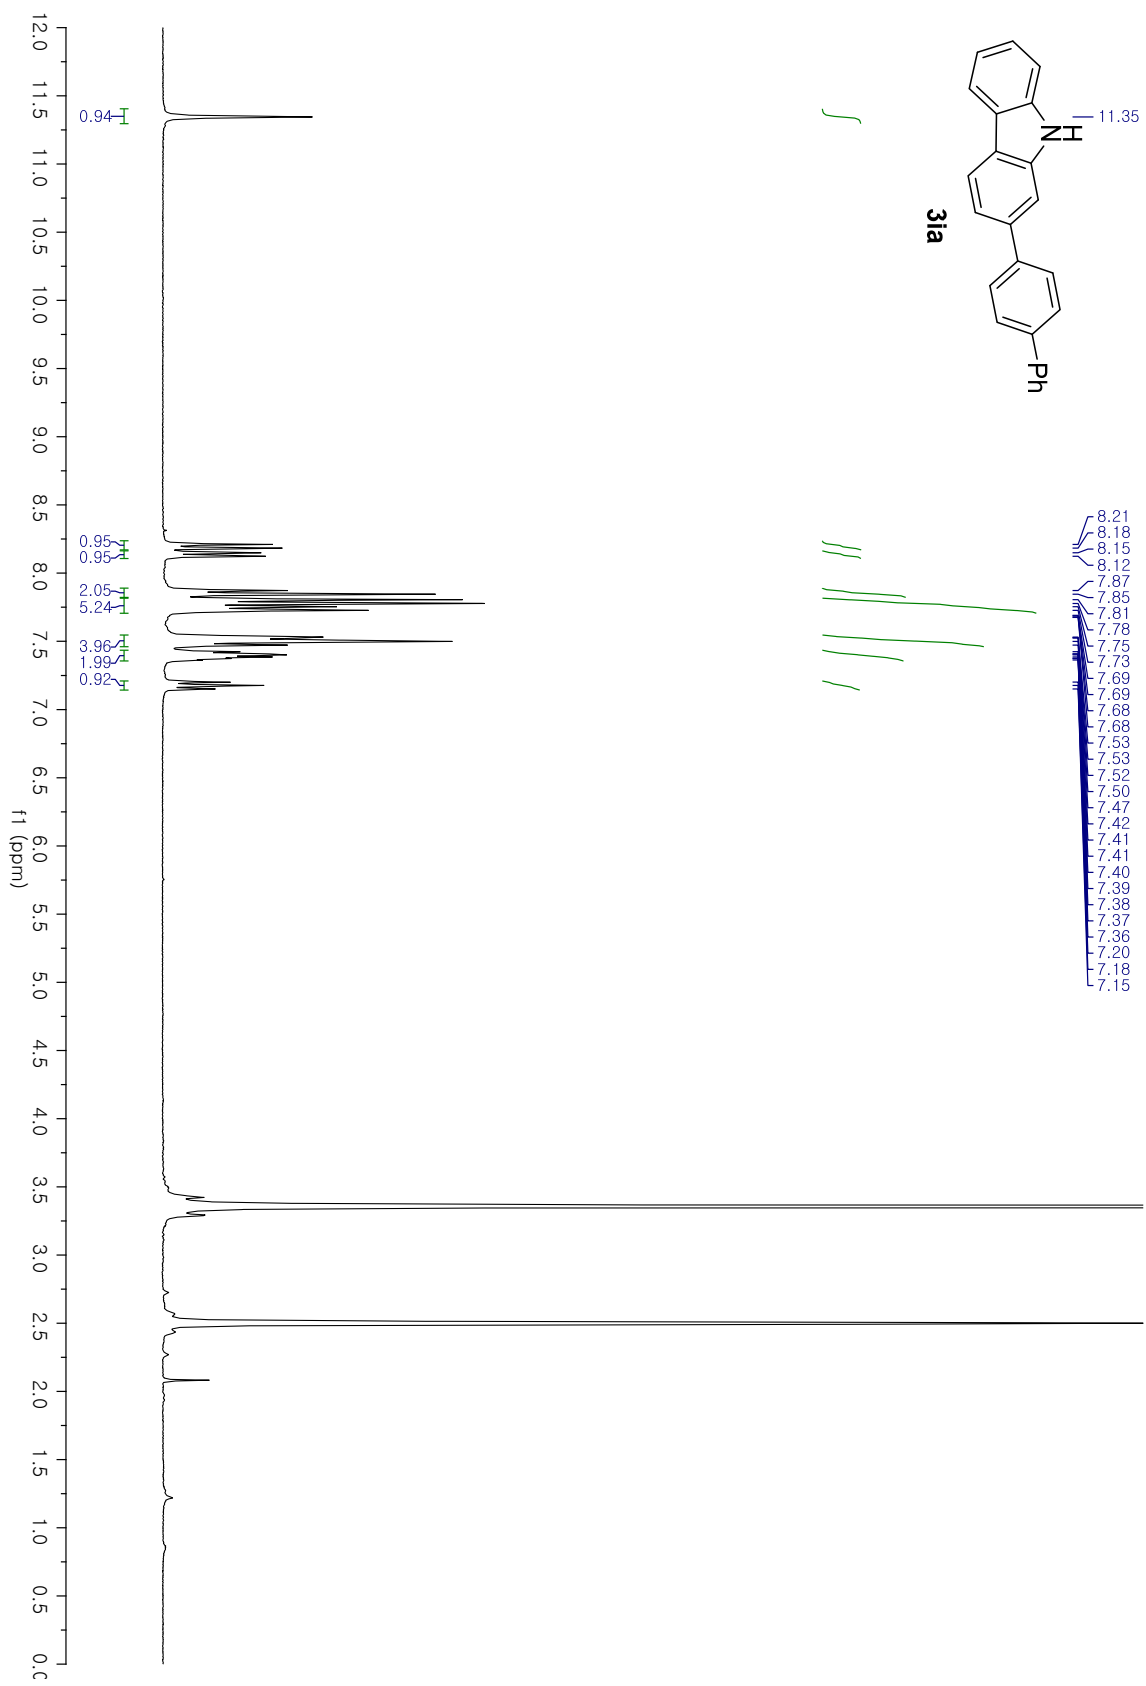

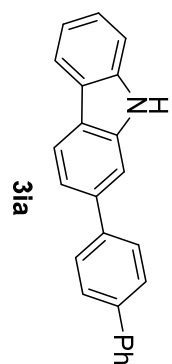

140.41  
 140.33  
 140.20  
 139.70  
 138.77  
 137.20  
 129.03  
 127.50  
 127.21  
 126.56  
 125.70  
 121.94  
 120.70  
 120.30  
 118.74  
 117.63  
 117.63  
 108.74

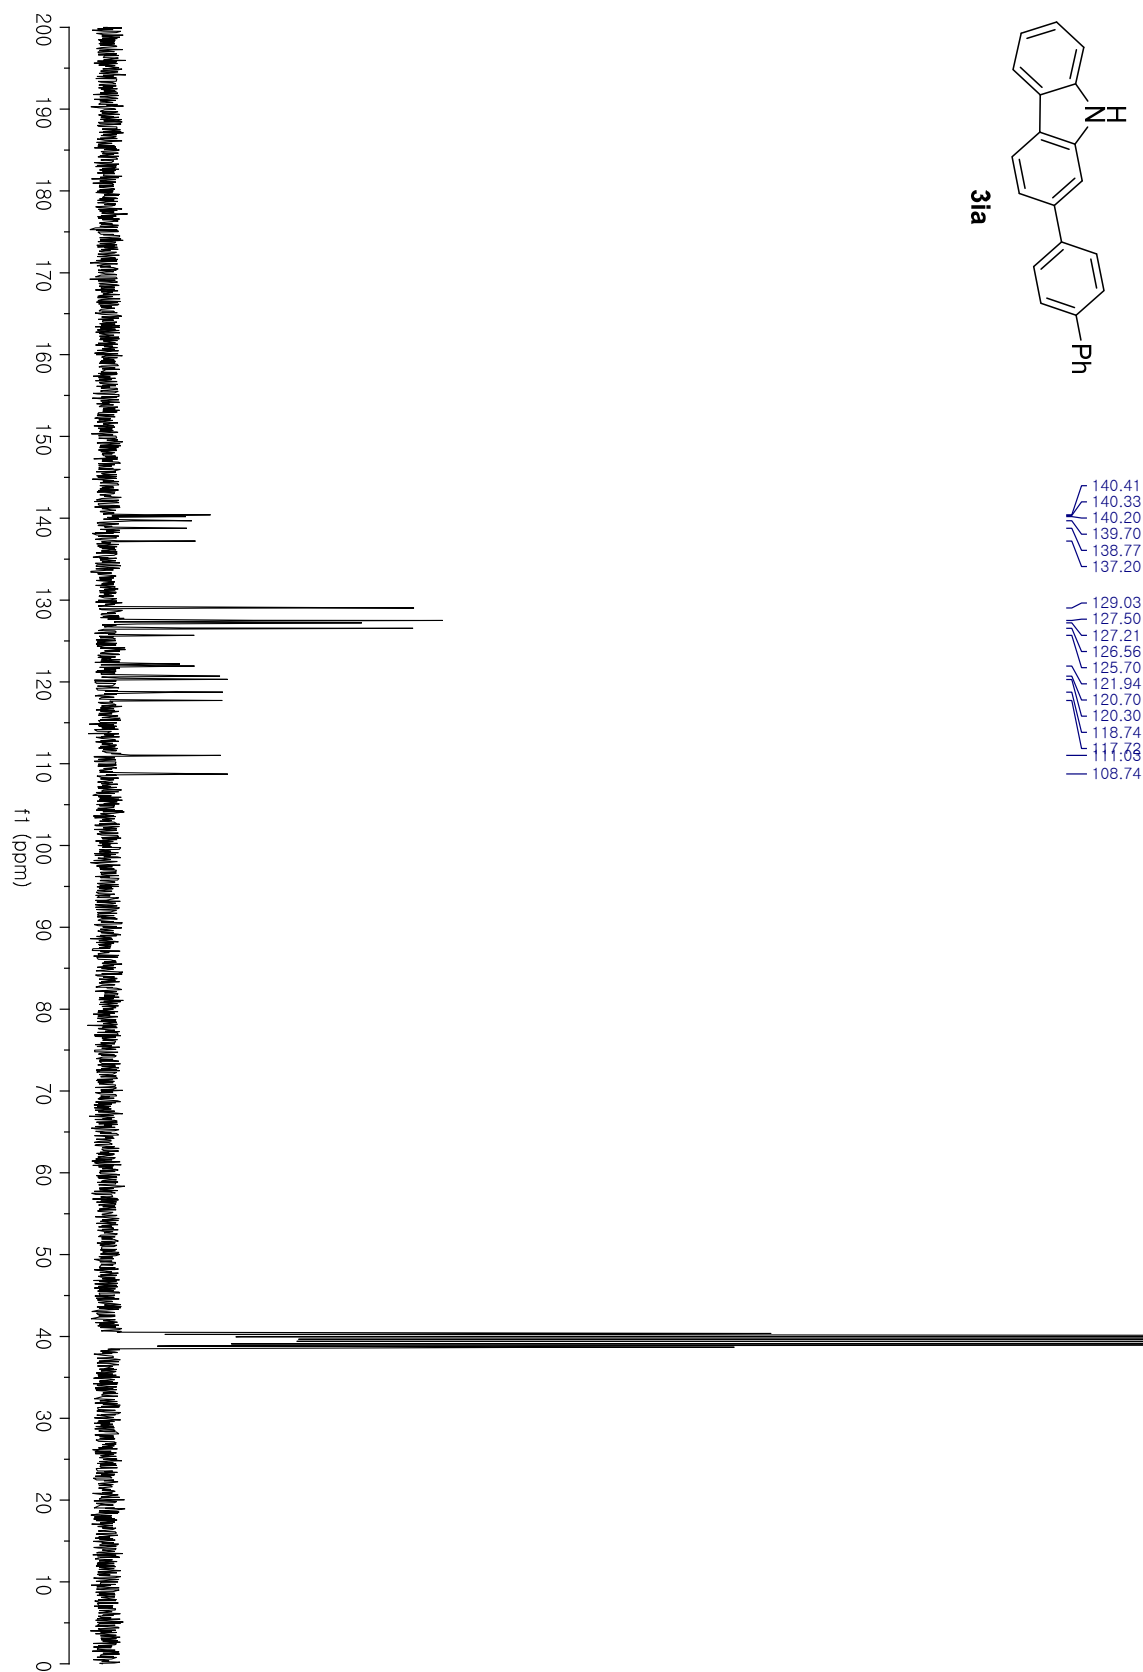

### 2-(4-Fluorophenyl)-9H-carbazole (3ib)

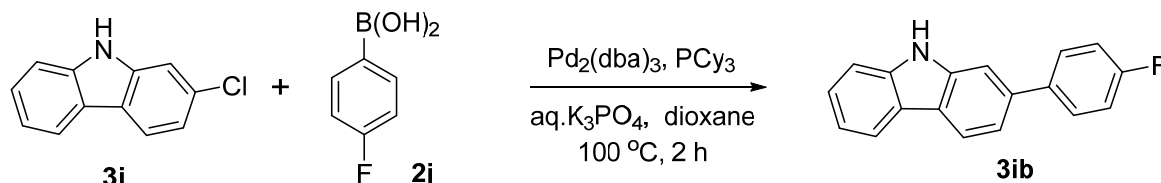

To a re-sealable pressure tube (13 x 100 mm) equipped with magnetic stir bar were 2-chloro-9H-carbazole **3i** (20 mg, 0.1 mmol, 100 mol%), (4-fluorophenyl)boronic acid **2j** (21 mg, 0.15 mmol, 150 mol%),  $\text{Pd}_2(\text{dba})_3$  (9 mg, 0.01 mmol, 10 mol%),  $\text{PCy}_3$  (7 mg, 0.25 mmol, 25 mol %),  $\text{K}_3\text{PO}_4$  (1.27 M in water, 0.27 mL, 0.34 mmol) and dioxane (2 mL, 0.05 M concentration with respect to 2-chloro-9H-carbazole **3i**). The slurry was sealed and purged with Argon gas for 5 minutes. The mixture was heated at  $100\text{ }^\circ\text{C}$  (oil bath temperature) for 2 hr, at which point the reaction mixture was allowed to cool to ambient temperature. The reaction mixture, treated with saturated sodium bicarbonate solution, and extracted with dichloromethane (3x). The combined organic layers were dried with magnesium sulfate, filtered, and concentrated *in vacuo* and purified by flash column chromatography ( $\text{SiO}_2$ ) using 5% ethyl acetate in hexanes as eluant to give **3ib** as a yellow solid (23 mg, 88% yield).

**TLC ( $\text{SiO}_2$ ):**  $R_f = 0.35$  (ethyl acetate:hexanes, 1:5)

**$^1\text{H NMR}$**  (300 MHz,  $\text{CDCl}_3$ )  $\delta$  8.12 (d,  $J = 7.8\text{ Hz}$ , 1H), 8.10 (s, 1H), 8.09 (d,  $J = 7.4\text{ Hz}$ , 1H), 7.68 – 7.61 (m, 2H), 7.58 (s, 1H), 7.46 – 7.40 (m, 3H), 7.30 – 7.22 (m, 1H), 7.19 – 7.11 (m, 2H).

**$^{13}\text{C NMR}$**  (75 MHz, Acetone)  $\delta$  163.17 (d,  $J = 243.9\text{ Hz}$ ), 141.61, 141.56, 139.27 (d,  $J = 3.2\text{ Hz}$ ), 138.56, 129.87 (d,  $J = 8.0\text{ Hz}$ ), 126.59, 123.71, 123.33, 121.34, 121.00, 119.91, 119.11, 116.33 (d,  $J = 21.5\text{ Hz}$ ), 111.80, 109.96.

**FTIR** (neat)  $\nu$  3400, 1650, 1367, 1223, 724  $\text{cm}^{-1}$

**LRMS**  $m/z$  (EI): 262.2 ( $\text{M}^+ + 1$ ), 262.2.

**HRMS**  $m/z$  (EI): calcd. For  $\text{C}_{18}\text{H}_{12}\text{FN}$  ( $\text{M}^+$ ) 261.0954, found 261.0953.

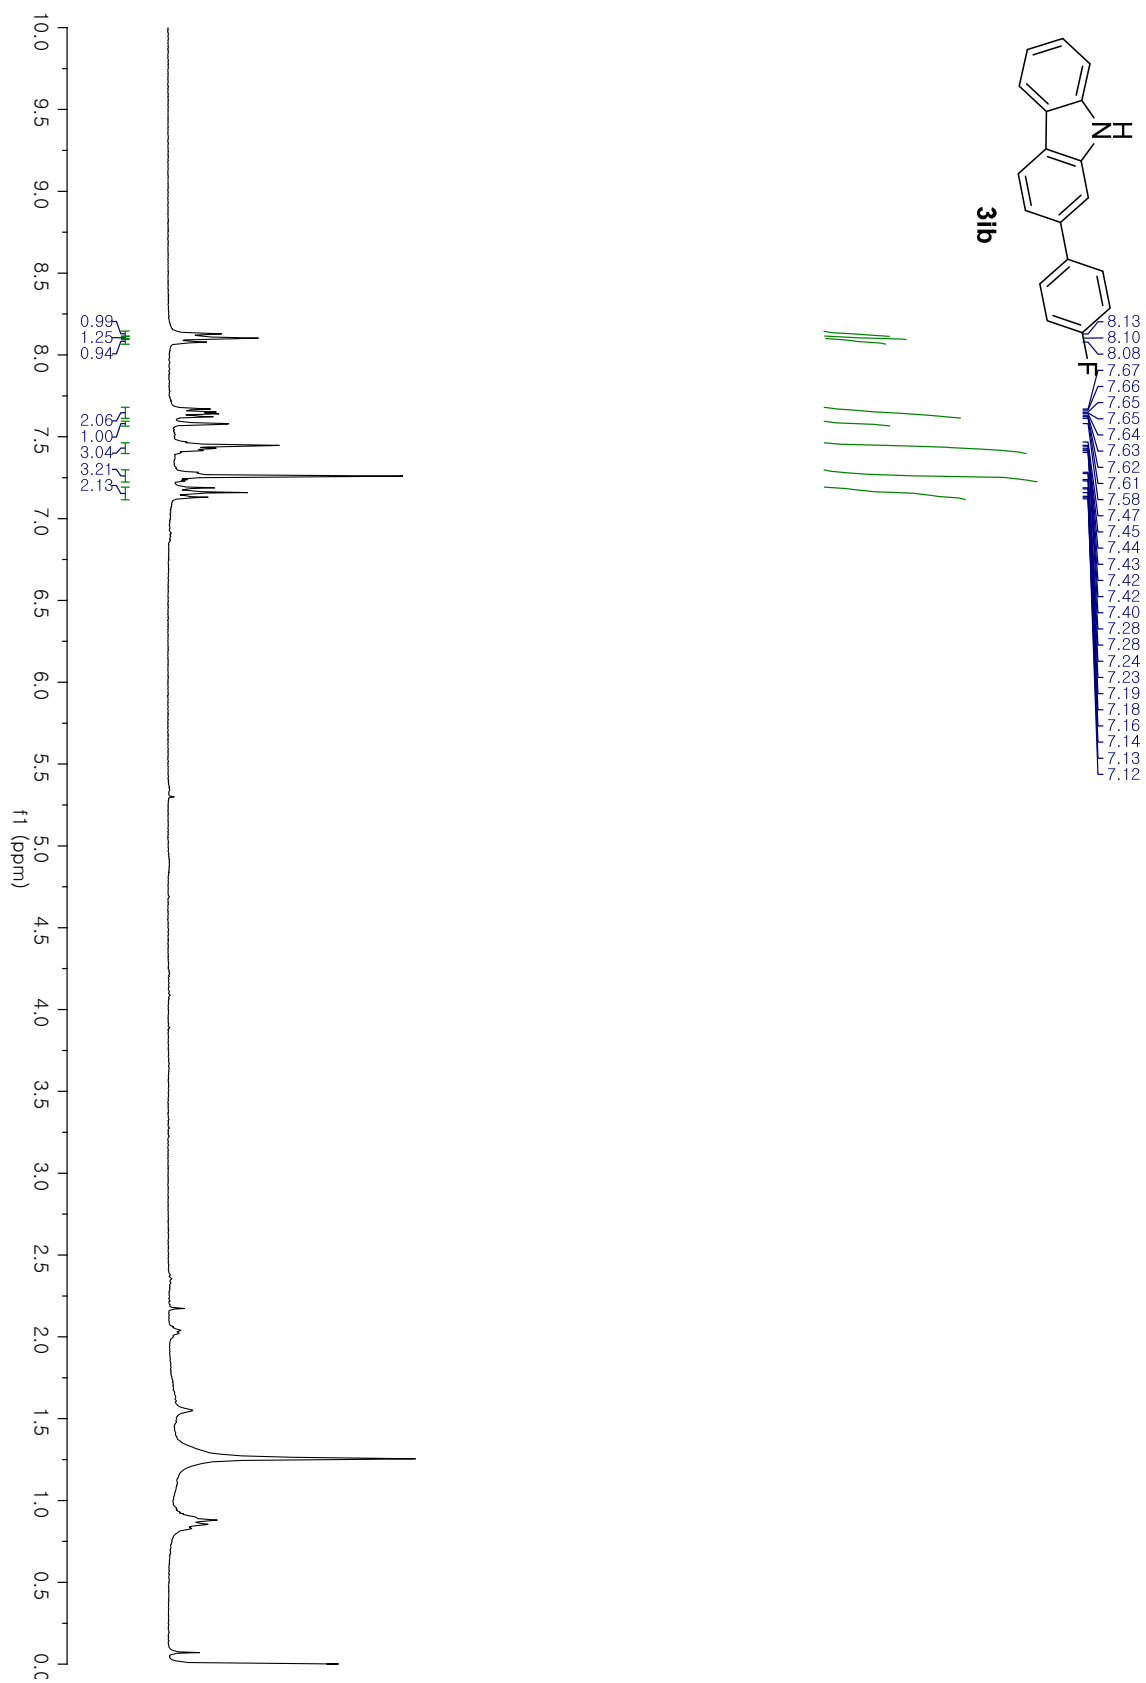



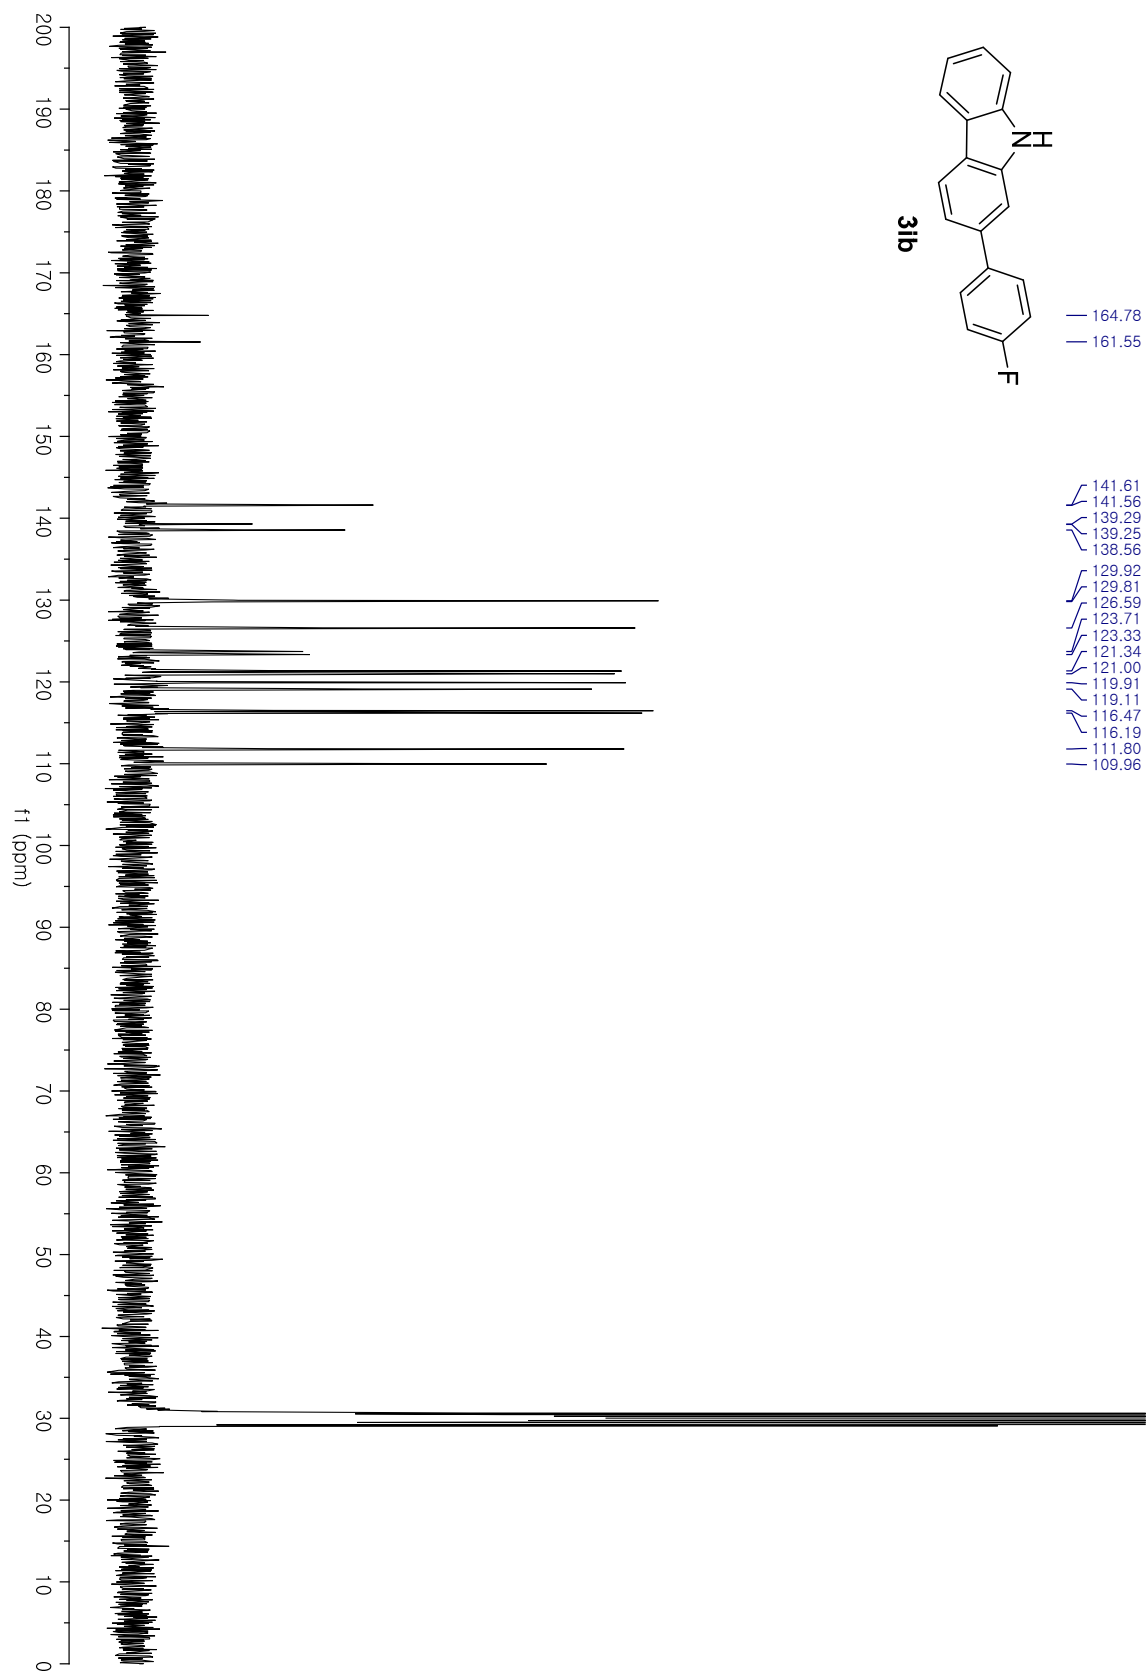

### Methyl 4-(9H-carbazol-2-yl)benzoate (3ic)

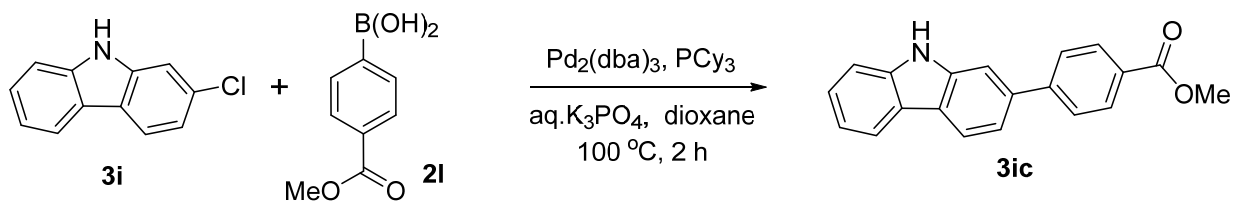

To a re-sealable pressure tube (13 x 100 mm) equipped with magnetic stir bar were 2-chloro-9H-carbazole **3i** (20 mg, 0.1 mmol, 100 mol%), (4-(methoxycarbonyl)phenyl)boronic acid **2i** (27 mg, 0.15 mmol, 150 mol%),  $\text{Pd}_2(\text{dba})_3$  (9 mg, 0.01 mmol, 10 mol%),  $\text{PCy}_3$  (7 mg, 0.25 mmol, 25 mol %),  $\text{K}_3\text{PO}_4$  (1.27 M in water, 0.27 mL, 0.34 mmol) and dioxane (2 mL, 0.05 M concentration with respect to 2-chloro-9H-carbazole **3i**). The slurry was sealed and purged with Argon gas for 5 minutes. The mixture was heated at  $100\text{ }^\circ\text{C}$  (oil bath temperature) for 2 hr, at which point the reaction mixture was allowed to cool to ambient temperature. The reaction mixture, treated with saturated sodium bicarbonate solution, and extracted with dichloromethane (3x). The combined organic layers were dried with magnesium sulfate, filtered, and concentrated *in vacuo* and purified by recrystallization from dichloromethane and hexanes to give **3ic** as a white solid (21 mg, 70% yield).

**TLC ( $\text{SiO}_2$ ):**  $R_f = 0.29$  (ethyl acetate:hexanes, 1:6)

**$^1\text{H NMR}$**  (300 MHz, DMSO)  $\delta$  11.39 (s, 1H), 8.22 (d,  $J = 8.2\text{ Hz}$ , 1H), 8.15 (d,  $J = 7.7\text{ Hz}$ , 1H), 8.07 (d,  $J = 8.4\text{ Hz}$ , 2H), 7.92 (d,  $J = 8.4\text{ Hz}$ , 2H), 7.81 (d,  $J = 1.3\text{ Hz}$ , 1H), 7.54 (dd,  $J = 8.2, 1.5\text{ Hz}$ , 1H), 7.52 (d,  $J = 8.1\text{ Hz}$ , 1H), 7.41 (td,  $J = 8.1, 0.9\text{ Hz}$ , 1H), 7.18 (td,  $J = 7.7, 0.5\text{ Hz}$ , 1H), 3.89 (s, 3H).

**$^{13}\text{C NMR}$**  (75 MHz, DMSO)  $\delta$  166.18, 145.77, 140.47, 140.28, 136.26, 129.86, 128.01, 127.21, 125.98, 122.59, 122.03, 120.83, 120.47, 118.85, 117.91, 111.11, 109.26, 52.16.

**FTIR** (neat)  $\nu$  3388, 2139, 1719, 1363, 1218, 1095, 702  $\text{cm}^{-1}$ .

**HRMS**  $m/z$  (EI): calcd. For  $\text{C}_{20}\text{H}_{15}\text{NO}_2$  ( $\text{M}^+$ ) 301.1103, found 301.1103.

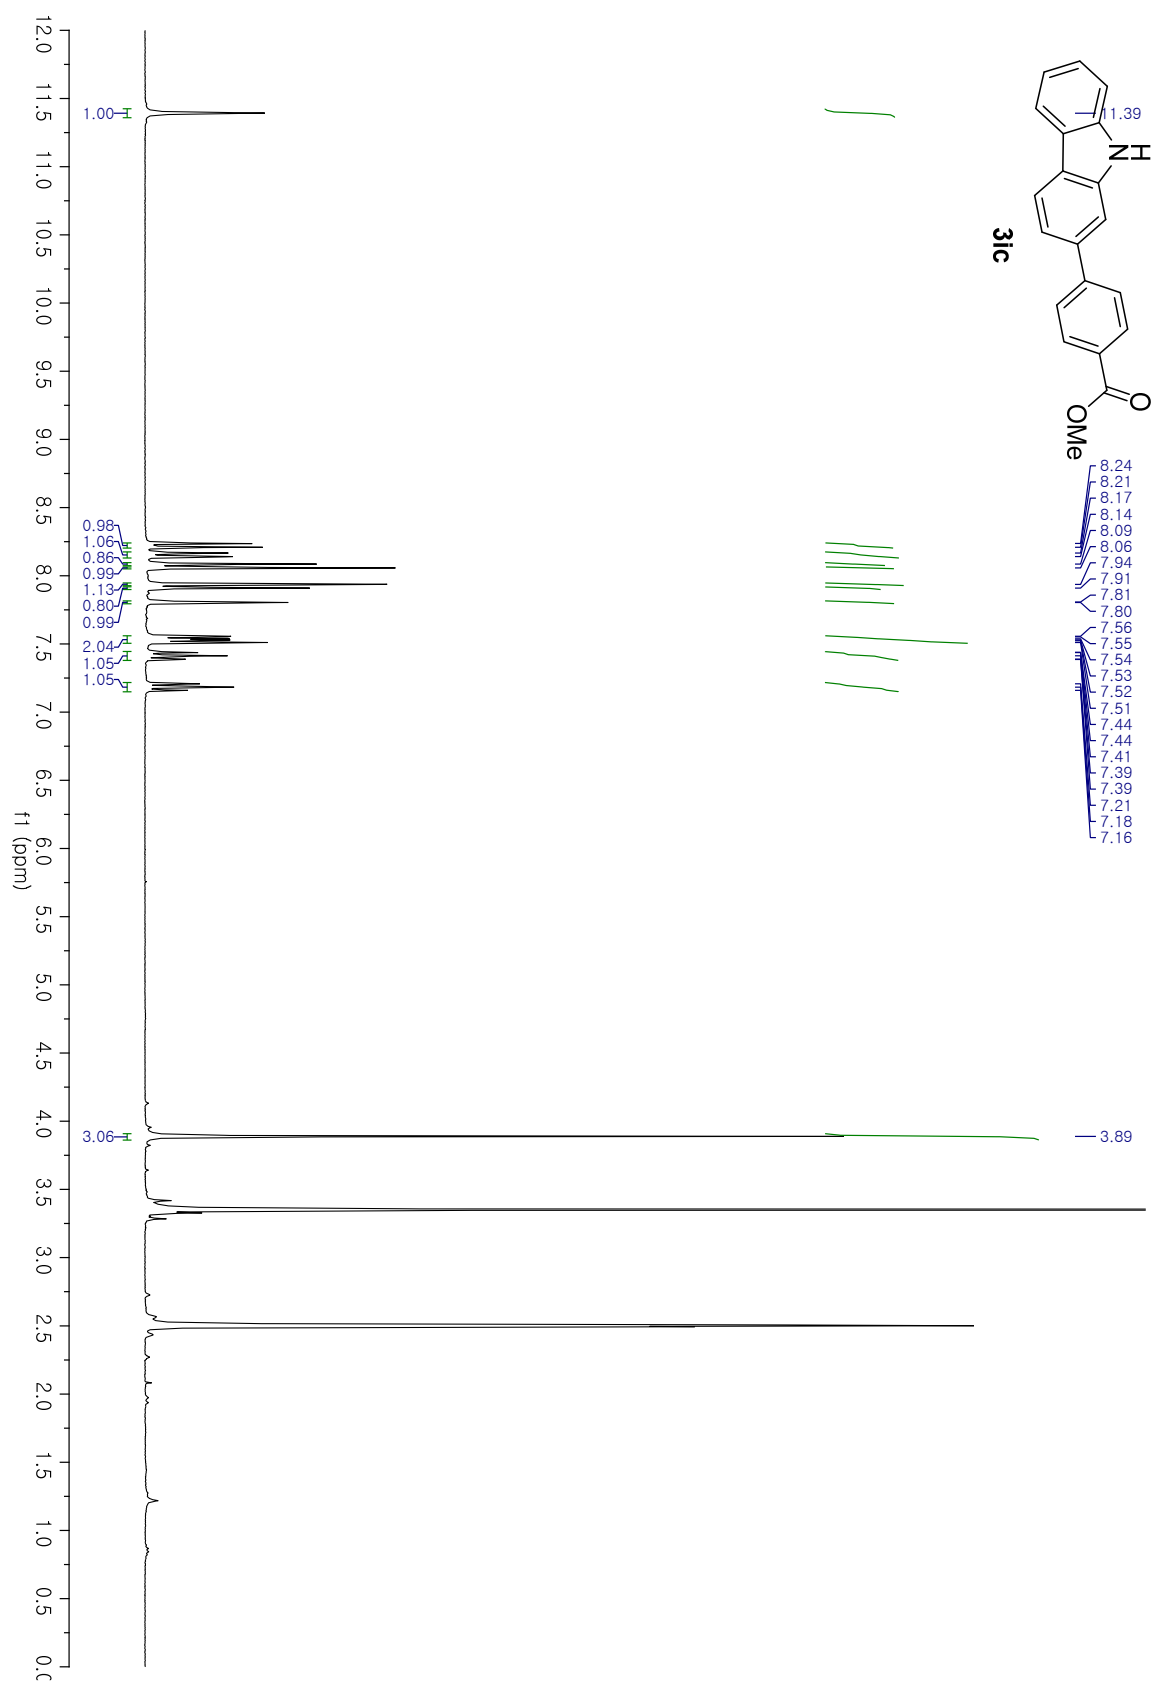

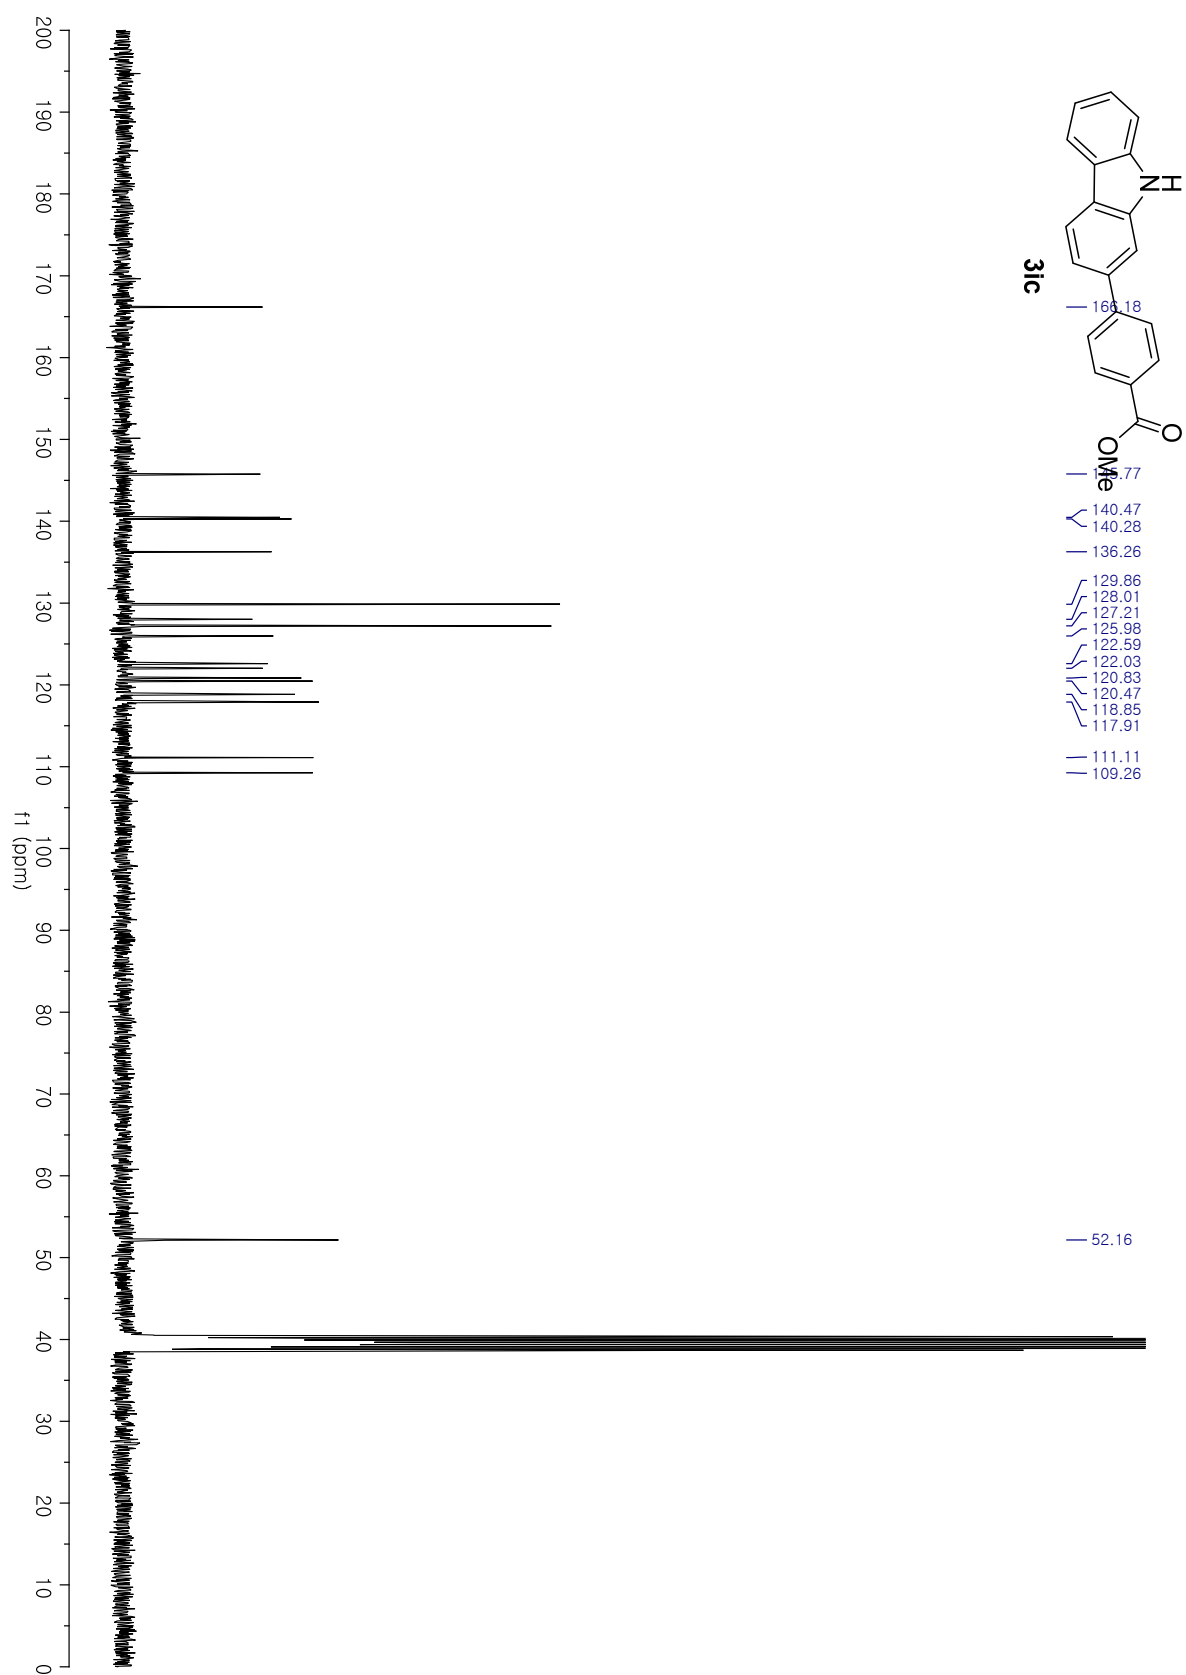

### 2-(2-Methoxyphenyl)-9H-carbazole (3id)

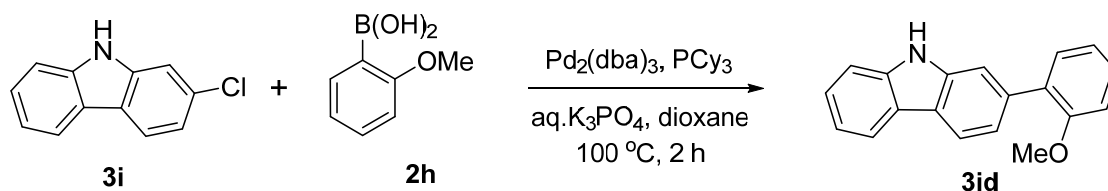

To a re-sealable pressure tube (13 x 100 mm) equipped with magnetic stir bar were 2-chloro-9H-carbazole **3i** (20 mg, 0.1 mmol, 100 mol%), (2-methoxyphenyl)boronic acid **2h** (23 mg, 0.15 mmol, 150 mol%),  $\text{Pd}_2(\text{dba})_3$  (9 mg, 0.01 mmol, 10 mol%),  $\text{PCy}_3$  (7 mg, 0.25 mmol, 25 mol %),  $\text{K}_3\text{PO}_4$  (1.27 M in water, 0.27 mL, 0.34 mmol) and dioxane (2 mL, 0.05 M concentration with respect to 2-chloro-9H-carbazole **3i**). The slurry was sealed and purged with Argon gas for 5 minutes. The mixture was heated at  $100^\circ\text{C}$  (oil bath temperature) for 2 hr, at which point the reaction mixture was allowed to cool to ambient temperature. The reaction mixture, treated with saturated sodium bicarbonate solution, and extracted with dichloromethane (3x). The combined organic layers were dried with magnesium sulfate, filtered, and concentrated *in vacuo* and purified by recrystallization from dichloromethane and hexanes to give **3id** as a white solid (26 mg, 95% yield).

**TLC ( $\text{SiO}_2$ ):**  $R_f$  = 0.38 (ethyl acetate:hexanes, 1:6)

**$^1\text{H NMR}$**  (300 MHz, Acetone)  $\delta$  10.34 (s, 1H), 8.12 (d,  $J$  = 8.2 Hz, 2H), 7.67 (d,  $J$  = 0.6 Hz, 1H), 7.52 (d,  $J$  = 8.1 Hz, 1H), 7.43 – 7.39 (m, 2H), 7.37 – 7.30 (m, 2H), 7.22 – 7.16 (m, 1H), 7.11 (d,  $J$  = 8.0 Hz, 1H), 7.05 (td,  $J$  = 7.4, 0.9 Hz, 1H), 3.81 (s, 3H).

**$^{13}\text{C NMR}$**  (75 MHz, DMSO)  $\delta$  156.58, 140.45, 140.02, 136.01, 131.16, 131.07, 129.05, 125.98, 122.63, 121.60, 121.27, 120.82, 120.53, 119.99, 119.10, 112.23, 112.02, 111.32, 55.90.

**FTIR** (neat)  $\nu$  3409, 3012, 1733, 1599, 1247, 1032, 866, 748  $\text{cm}^{-1}$

**LRMS**  $m/z$  (EI): 273.2 ( $\text{M}^+$ ), 273.9, 258.3.

**HRMS**  $m/z$  (EI): calcd.  $\text{C}_{19}\text{H}_{15}\text{NO}$  ( $\text{M}^+$ ) 273.1155, found 273.1154.

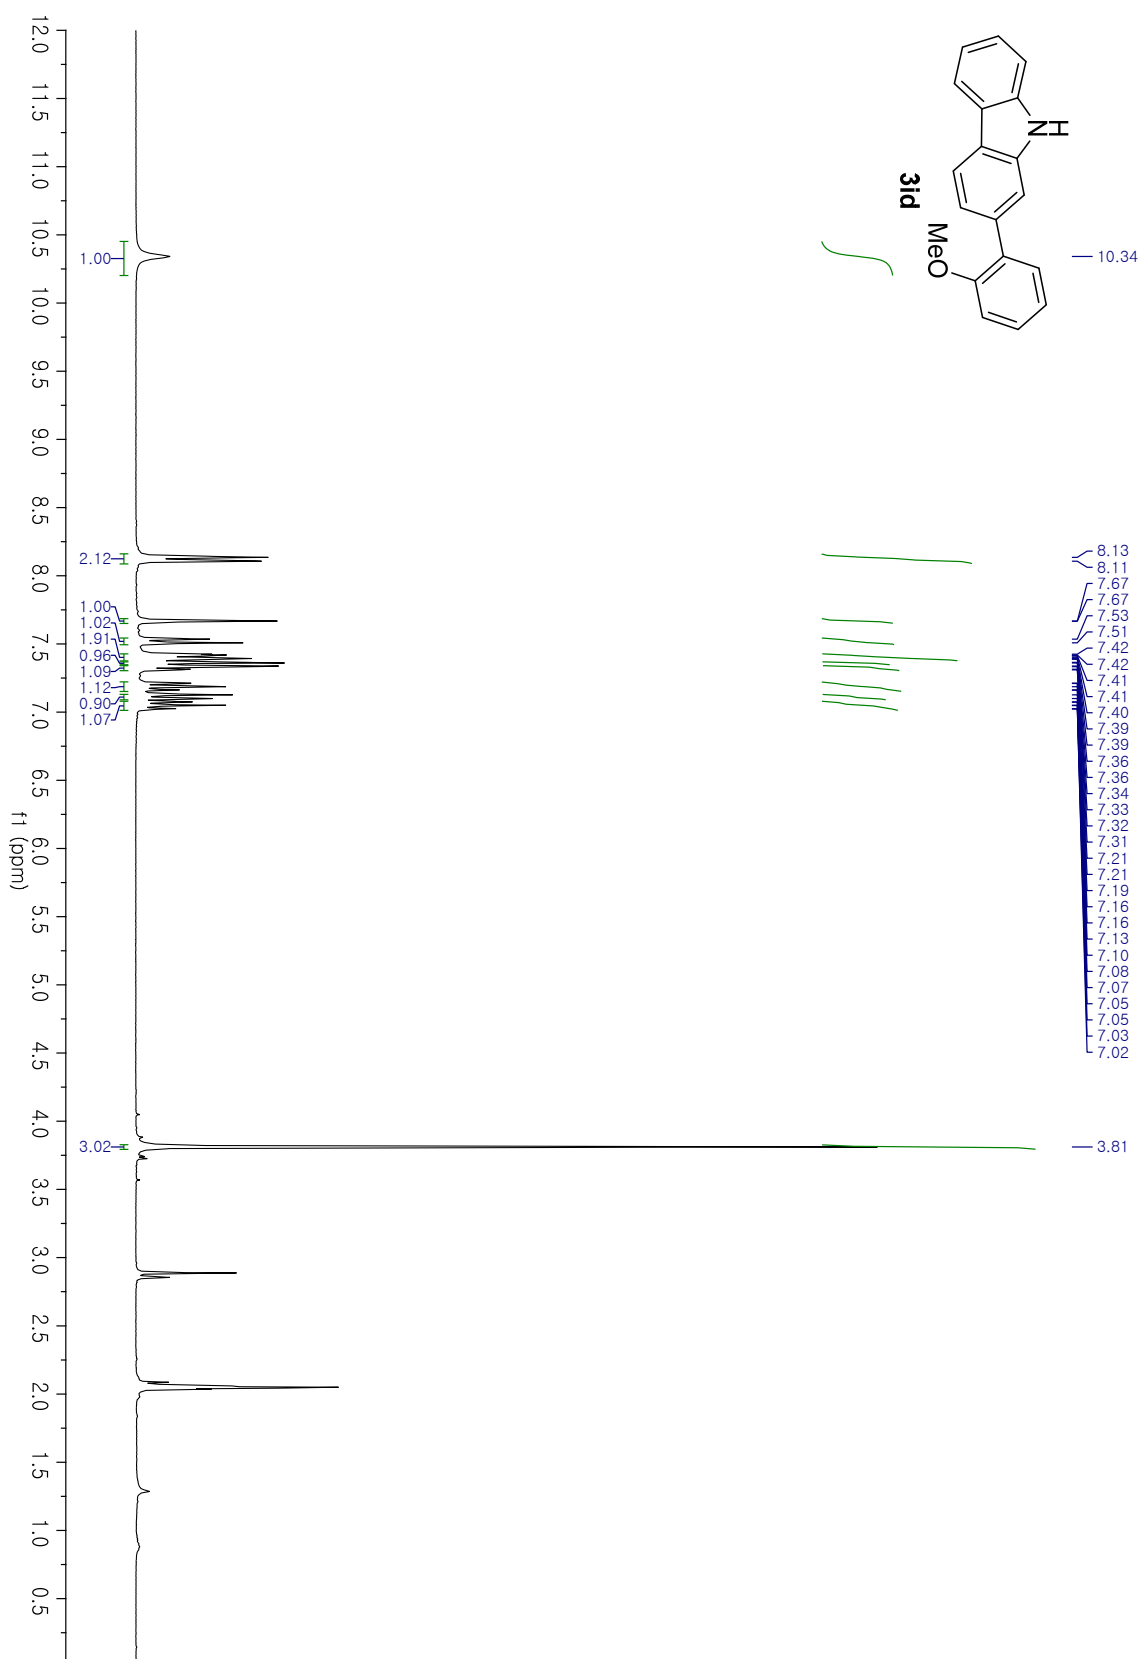

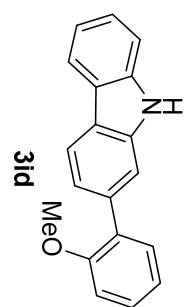

— 156.58

140.45

140.02

— 136.01

131.16

129.05

125.98

122.63

121.60

121.27

120.82

120.53

119.99

119.43

118.23

112.02

111.32

— 55.90

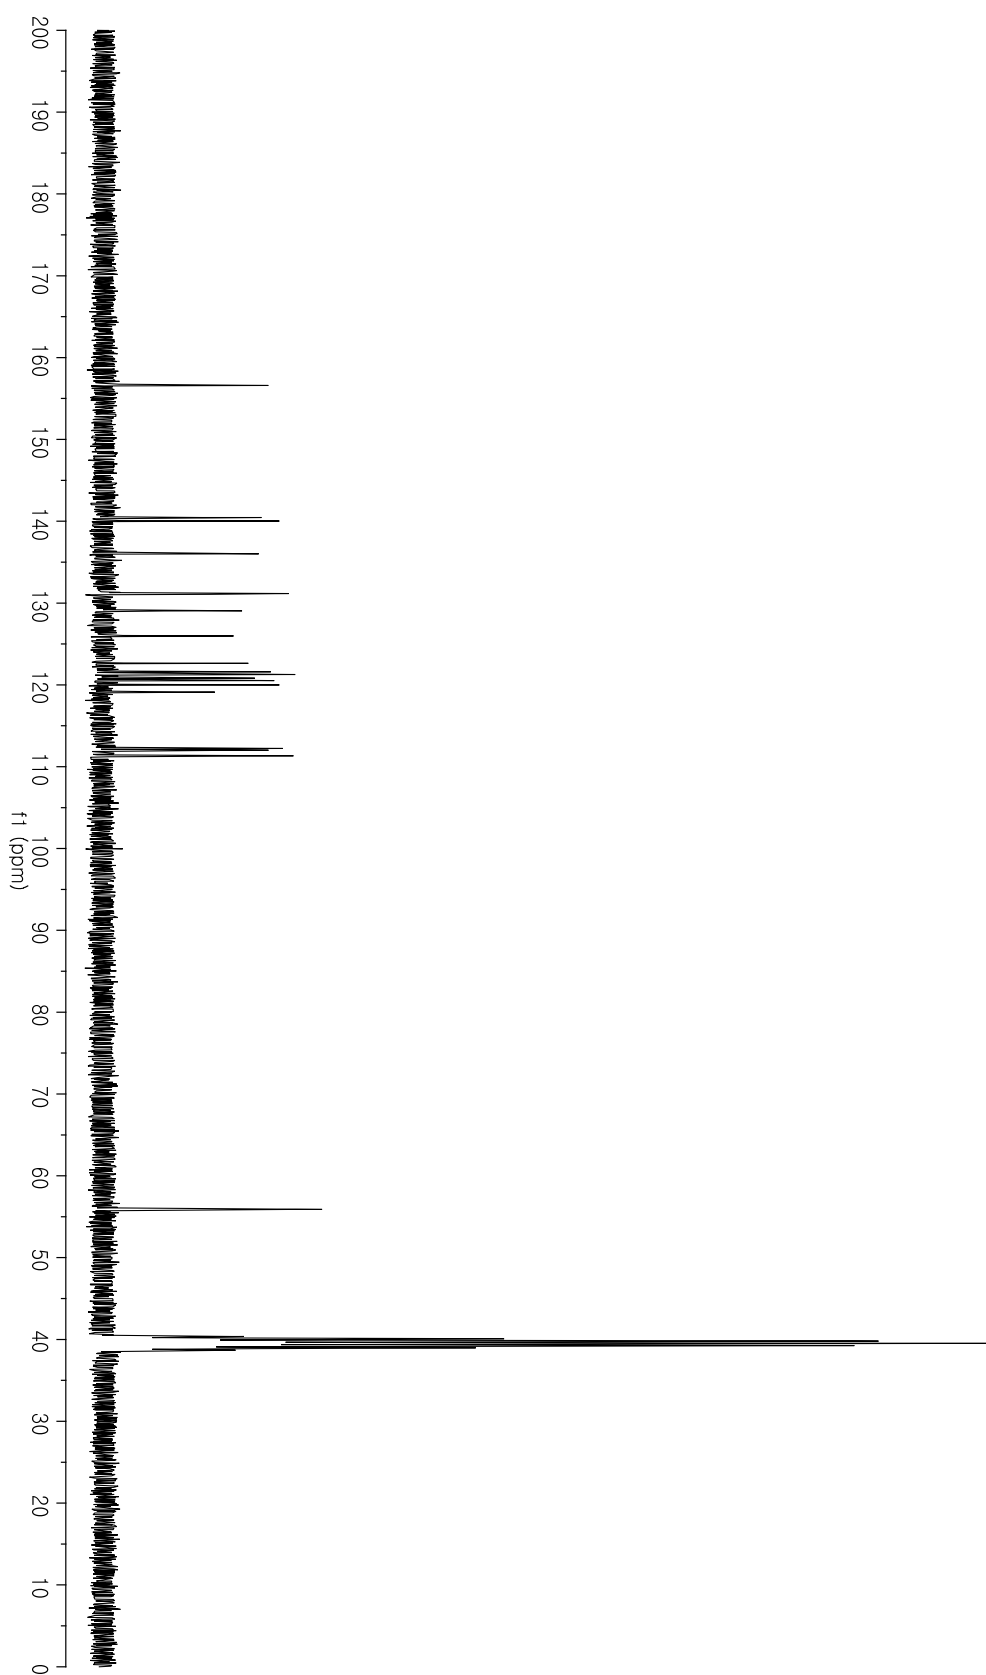

Supplement: c5ob01952d1.pdf [file c5ob01952d1.pdf]
